# Supplementary material
Source: MDPI journal article supplement (https://www.mdpi.com/2304-6740/9/2/14)
Supplement: s1 [file s1]

# Supporting information

## Fluorination effects in XPhos gold(I) fluorothiolates

Guillermo Moreno-Alcantar,<sup>1\*</sup> Cristian Díaz-Rosas,<sup>1</sup> Alberto Fernández-Alarcón,<sup>2\*</sup> Luis Turcio-García,<sup>1</sup> Marcos Flores-Álamo,<sup>1</sup> Tomás Rocha-Rinza,<sup>2</sup> and Hugo Torrens.<sup>1</sup>

<sup>1</sup> School of Chemistry, National Autonomous University of Mexico, Circuito Escolar, Ciudad Universitaria, Coyoacán, 04510 Mexico City, México.

<sup>2</sup> Institute of Chemistry, National Autonomous University of Mexico, Circuito Exterior, Ciudad Universitaria, Coyoacán, 04510, Mexico City, México.

\* Correspondence: lgma@comunidad.unam.mx; al.fedza@gmail.com; Tel.: +52-55-5622-3724

---

### Contents

|                                            |     |
|--------------------------------------------|-----|
| Conformers of <b>7</b> and <b>12</b> ..... | 2   |
| Supplementary QTAIM indicators .....       | 2   |
| Linear regression parameters .....         | 3   |
| Crystallographic tables .....              | 5   |
| Compound 1. ....                           | 5   |
| Compound 2. ....                           | 20  |
| Compound 3 .....                           | 34  |
| Compound 4 .....                           | 48  |
| Compound 6 .....                           | 63  |
| Compound 7. ....                           | 78  |
| Compound 8 .....                           | 104 |
| Compound 12 .....                          | 116 |

---

## Conformers of 7 and 12

Compounds **7** and **12** present two different conformers in the crystal asymmetric unit. In compound **7**, the variations in molecular distances and angles are small. In contrast, the conformers of compound **12** are noticeably different, as shown in Table 1, in the body of the manuscript.

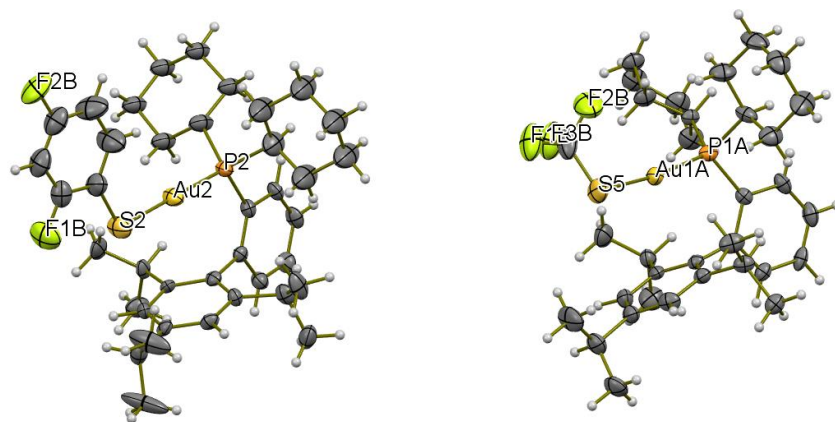

Figure S1. ORTEP diagrams at 50 % probability level of the conformers of **7** and **12** not shown in Figure 1 in the manuscript.

## Supplementary QTAIM indicators

Table S 1 Additional QTAIM parameters for selected interactions.  $\rho(r_{bcp})$  are absent when there's not a bcp associated to the interaction. DI (Au,F) are shown for potential Au-F interaction exist. Only the higher  $\rho$  and DI(Au,H) is reported when there's more than one Au-H contact. Atomic units are used throughout.

| Structure  | $\rho(r_{bcp})$ |        | DI (A,B)                    |        |        |        | $q$     |         |        |         |                   |                   |
|------------|-----------------|--------|-----------------------------|--------|--------|--------|---------|---------|--------|---------|-------------------|-------------------|
|            | Au-H            | S-H    | Au,C <sub>ortho-bis</sub> * | S,H    | Au,F   | Au,H   | Au      | S       | P      | Cs**    | C <sub>ipso</sub> | C <sub>orto</sub> |
| <b>1</b>   | 0.0082          | 0.0068 | 0.0322                      | 0.0352 | 0.0420 | 0.0372 | -0.0212 | -0.116  | 1.592  | -0.0841 | -0.0423           | -0.0339           |
| <b>2</b>   | 0.0065          | 0.0050 | 0.0355                      | 0.0324 | 0.1049 | 0.0335 | -0.0089 | -0.1475 | 1.6362 | -0.075  | -0.0415           | -0.0295           |
| <b>3</b>   | 0.0066          | 0.0038 | 0.0319                      | 0.0218 | 0.0987 | 0.0281 | -0.0078 | -0.1366 | 1.5986 | -0.0836 | -0.0409           | -0.0292           |
| <b>4</b>   | 0.0071          | -      | 0.0327                      | 0.0127 | -      | 0.0354 | -0.0243 | -0.1508 | 1.5844 | -0.145  | -0.043            | -0.0289           |
| <b>6</b>   | 0.0074          | 0.0069 | 0.0347                      | 0.0439 | -      | 0.0330 | -0.0339 | -0.2005 | 1.6295 | -0.1383 | -0.0444           | -0.0357           |
| <b>7</b>   | 0.0082          | -      | 0.0372                      | 0.0418 | -      | 0.0418 | -0.0390 | -0.1539 | 1.4996 | -0.1419 | -0.0466           | -0.0287           |
| <b>8</b>   | 0.0067          | 0.004  | 0.337                       | 0.0242 | -      | 0.0274 | -0.0407 | -0.2021 | 1.618  | -0.1186 | -0.0371           | -0.028            |
| <b>12a</b> | 0.0061          | -      | 0.0538                      | 0.0079 | -      | 0.0317 | -0.0182 | -0.1243 | 1.5942 | 1.5409  | -0.0442           | -0.0261           |
| <b>12b</b> | 0.0079          | 0.0038 | 0.0431                      | 0.0243 | -      | 0.0421 | -0.0096 | -0.0566 | 1.554  | 1.449   | -0.0413           | -0.0282           |

\*C atom not directly involved in the Au- $\pi$  interaction. \*\* C atom directly bonded to the sulfur.

## Linear regression parameters

### ▪ $DI(Au,Ph)$ vs Distance $Au \cdots \pi$ .

Table S2. Linear regression parameters for  $DI(Au,Ph)$  as a function of the  $Au \cdots \pi$  distance in Figure 3a in the body of the manuscript.

| Equation                | $y = a + b \cdot x$ |          |                |
|-------------------------|---------------------|----------|----------------|
| Weight                  | No Weighting        |          |                |
| Residual Sum of Squares | 1.05169E-4          |          |                |
| Pearson's r ( $r^2$ )   | -0.93532 (0.8748)   |          |                |
| Adj. R-Square           | 0.84979             |          |                |
| B                       |                     | Value    | Standard Error |
|                         | Intercept (a)       | 1.21861  | 0.16501        |
|                         | Slope (b)           | -0.31448 | 0.0532         |

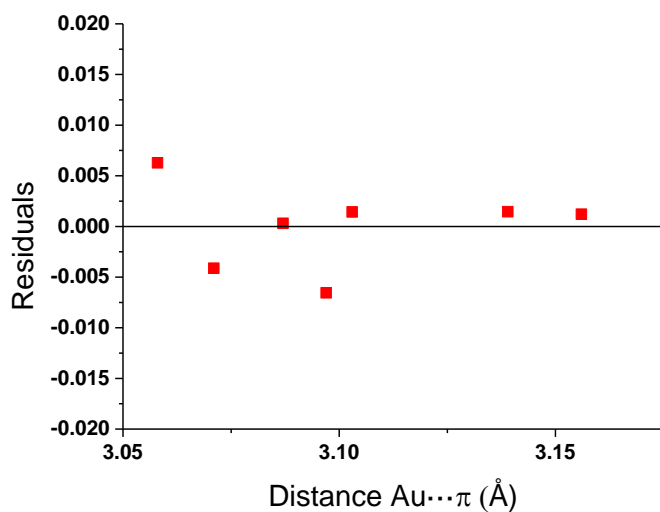

Figure S2. Residuals for the linear fit shown in Figure 3a in the body of the manuscript.

### ▪ $DI(C_{ipso}, C_{ortho})$ vs $\eta_{DI}$

Table S3. Linear regression parameters for the relation between  $DI(C_{ipso}, C_{ortho})$  and  $\eta_{DI}$ , Figure 3b in the body of the manuscript.

| Equation                | $y = a + b \cdot x$ |          |                |
|-------------------------|---------------------|----------|----------------|
| Weight                  | No Weighting        |          |                |
| Residual Sum of Squares | 6.94574E-5          |          |                |
| Pearson's r ( $r^2$ )   | -0.93433 (0.08730)  |          |                |
| Adj. R-Square           | 0.84757             |          |                |
| B                       |                     | Value    | Standard Error |
|                         | Intercept           | 1.52159  | 0.03968        |
|                         | Slope               | -0.12265 | 0.02092        |

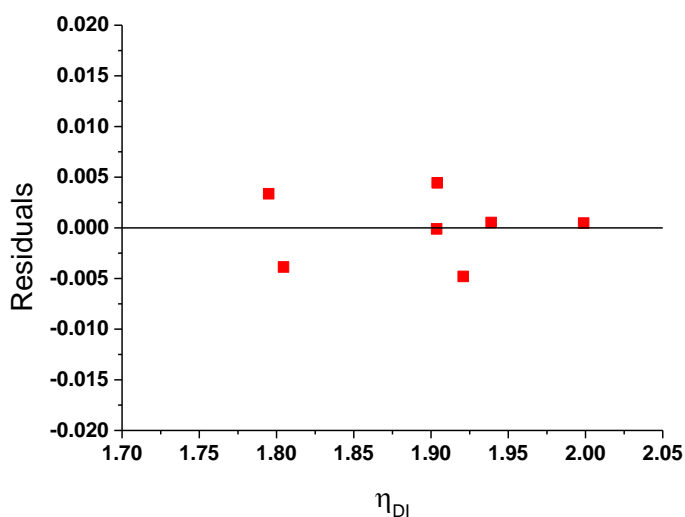

Figure S3 Residuals for the linear fit shown in Figure 3b in the body of the manuscript.

#### ▪ DI(Au,S) vs $\delta^{31}\text{P-NMR}$

Table S4. Linear regression parameters for the relation between the DI(Au,S) and the  $\delta^{31}\text{P-NMR}$ , Figure 6 in the body of the manuscript

| Equation                | $y = a + b \cdot x$ |          |                |
|-------------------------|---------------------|----------|----------------|
| Weight                  | No Weighting        |          |                |
| Residual Sum of Squares | 5.46572E-4          |          |                |
| Pearson's $r$ ( $r^2$ ) | 0.88608 (0.7891)    |          |                |
| Adj. R-Square           | 0.75445             |          |                |
| B                       |                     | Value    | Standard Error |
|                         | Intercept           | -0.08673 | 0.22489        |
|                         | Slope               | 0.02896  | 0.00573        |

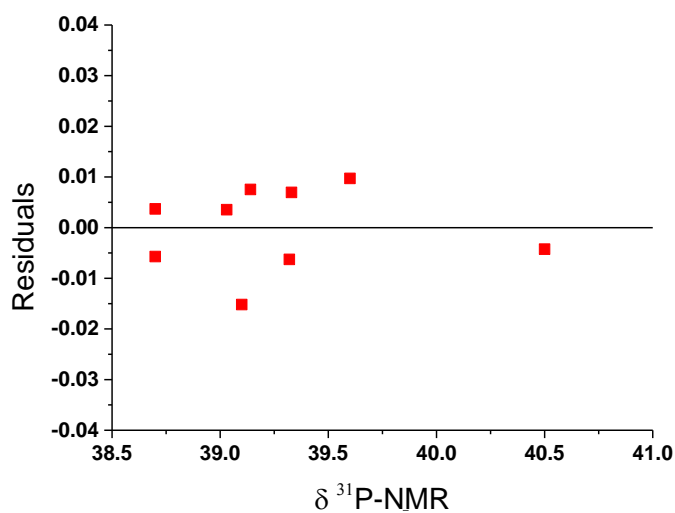

Figure S4 Residuals for the linear fit shown in Figure 6 in the body of the manuscript.

## Crystallographic tables.

### Compound 1.

Table S5. Crystal data and structure refinement for cldr07.

|                                   |                                                       |                             |
|-----------------------------------|-------------------------------------------------------|-----------------------------|
| Identification code               | cldr07                                                |                             |
| Empirical formula                 | C <sub>40</sub> H <sub>49</sub> Au F <sub>7</sub> P S |                             |
| Formula weight                    | 922.79                                                |                             |
| Temperature                       | 130(2) K                                              |                             |
| Wavelength                        | 0.71073 Å                                             |                             |
| Crystal system                    | Monoclinic                                            |                             |
| Space group                       | P 2 <sub>1</sub> /n                                   |                             |
| Unit cell dimensions              | a = 15.7516(6) Å                                      | $\alpha = 90^\circ$ .       |
|                                   | b = 13.6785(5) Å                                      | $\beta = 94.721(4)^\circ$ . |
|                                   | c = 17.5928(7) Å                                      | $\gamma = 90^\circ$ .       |
| Volume                            | 3777.7(3) Å <sup>3</sup>                              |                             |
| Z                                 | 4                                                     |                             |
| Density (calculated)              | 1.623 Mg/m <sup>3</sup>                               |                             |
| Absorption coefficient            | 4.055 mm <sup>-1</sup>                                |                             |
| F(000)                            | 1848                                                  |                             |
| Crystal size                      | 0.398 x 0.263 x 0.070 mm <sup>3</sup>                 |                             |
| Theta range for data collection   | 3.415 to 29.488°.                                     |                             |
| Index ranges                      | -19 ≤ h ≤ 21, -18 ≤ k ≤ 13, -23 ≤ l ≤ 24              |                             |
| Reflections collected             | 20281                                                 |                             |
| Independent reflections           | 8980 [R(int) = 0.0313]                                |                             |
| Completeness to theta = 25.242°   | 99.7 %                                                |                             |
| Absorption correction             | Analytical                                            |                             |
| Max. and min. transmission        | 0.591 and 0.203                                       |                             |
| Refinement method                 | Full-matrix least-squares on F <sup>2</sup>           |                             |
| Data / restraints / parameters    | 8980 / 0 / 457                                        |                             |
| Goodness-of-fit on F <sup>2</sup> | 1.039                                                 |                             |
| Final R indices [I > 2σ(I)]       | R1 = 0.0439, wR2 = 0.0868                             |                             |
| R indices (all data)              | R1 = 0.0617, wR2 = 0.0961                             |                             |
| Extinction coefficient            | n/a                                                   |                             |
| Largest diff. peak and hole       | 3.237 and -2.749 e.Å <sup>-3</sup>                    |                             |

Table S6. Atomic coordinates ( $\times 10^4$ ) and equivalent isotropic displacement parameters ( $\text{\AA}^2 \times 10^3$ ) for cldr07. U(eq) is defined as one third of the trace of the orthogonalized  $U^{ij}$  tensor.

|       | x       | y       | z       | U(eq) |
|-------|---------|---------|---------|-------|
| Au(1) | 6088(1) | 2402(1) | 4122(1) | 28(1) |
| S(1)  | 5531(1) | 1252(1) | 4892(1) | 57(1) |
| P(1)  | 6578(1) | 3442(1) | 3272(1) | 19(1) |
| F(1)  | 4201(3) | 1772(3) | 5897(2) | 68(1) |
| F(2)  | 2579(3) | 1956(3) | 5601(2) | 70(1) |
| F(3)  | 2871(3) | 1106(3) | 3024(2) | 63(1) |
| F(4)  | 4538(3) | 947(3)  | 3341(2) | 57(1) |
| F(5)  | 1283(3) | 1844(5) | 4690(3) | 96(2) |
| F(6)  | 1393(3) | 793(3)  | 3822(3) | 93(2) |
| F(7)  | 1514(3) | 2301(3) | 3575(3) | 67(1) |
| C(1)  | 4445(4) | 1369(4) | 4632(3) | 37(1) |
| C(2)  | 3884(4) | 1613(4) | 5171(4) | 45(2) |
| C(3)  | 3035(4) | 1709(4) | 5007(4) | 43(1) |
| C(4)  | 2658(4) | 1548(4) | 4302(4) | 46(2) |
| C(5)  | 3194(4) | 1292(4) | 3750(3) | 41(1) |
| C(6)  | 4062(4) | 1200(4) | 3907(3) | 37(1) |
| C(7)  | 6277(3) | 2955(3) | 2308(3) | 22(1) |
| C(8)  | 6651(3) | 1927(3) | 2257(3) | 27(1) |
| C(9)  | 6408(3) | 1445(4) | 1487(3) | 33(1) |
| C(10) | 5447(4) | 1445(4) | 1309(3) | 37(1) |
| C(11) | 5083(3) | 2475(4) | 1347(3) | 37(1) |
| C(12) | 5308(3) | 2931(4) | 2133(3) | 28(1) |
| C(13) | 6172(3) | 4707(3) | 3350(3) | 23(1) |
| C(14) | 5276(3) | 4747(4) | 3627(3) | 32(1) |
| C(15) | 5003(4) | 5800(4) | 3745(4) | 41(1) |
| C(16) | 5046(4) | 6389(4) | 3021(4) | 41(1) |
| C(17) | 5948(4) | 6375(4) | 2762(3) | 36(1) |
| C(18) | 6244(3) | 5329(3) | 2634(3) | 28(1) |
| C(19) | 7739(3) | 3580(3) | 3313(3) | 19(1) |
| C(20) | 8110(3) | 3873(3) | 2653(3) | 21(1) |
| C(21) | 8980(3) | 4010(4) | 2648(3) | 26(1) |
| C(22) | 9495(3) | 3847(4) | 3314(3) | 27(1) |
| C(23) | 9138(3) | 3562(4) | 3966(3) | 25(1) |
| C(24) | 8264(3) | 3419(3) | 3981(3) | 19(1) |
| C(25) | 7954(3) | 3071(3) | 4728(3) | 20(1) |
| C(26) | 7722(3) | 3738(3) | 5272(3) | 21(1) |
| C(27) | 7487(3) | 3385(4) | 5972(3) | 24(1) |
| C(28) | 7487(3) | 2397(4) | 6143(3) | 24(1) |
| C(29) | 7731(3) | 1749(3) | 5598(3) | 23(1) |
| C(30) | 7966(3) | 2061(3) | 4887(3) | 21(1) |
| C(31) | 7758(3) | 4837(3) | 5137(3) | 24(1) |
| C(32) | 6970(4) | 5375(4) | 5369(3) | 34(1) |
| C(33) | 8565(4) | 5271(4) | 5555(4) | 41(1) |
| C(34) | 7246(3) | 2054(4) | 6918(3) | 27(1) |

|       |         |         |         |       |
|-------|---------|---------|---------|-------|
| C(35) | 8027(4) | 1664(5) | 7395(3) | 47(2) |
| C(36) | 6535(4) | 1300(4) | 6859(3) | 42(1) |
| C(37) | 8265(3) | 1311(3) | 4326(3) | 25(1) |
| C(38) | 9183(4) | 1016(5) | 4559(4) | 45(2) |
| C(39) | 7701(4) | 413(4)  | 4248(3) | 35(1) |
| C(40) | 1727(5) | 1617(5) | 4087(5) | 58(2) |

---

Table S7. Bond lengths [Å] and angles [°] for cldr07.

---

|              |            |
|--------------|------------|
| Au(1)-P(1)   | 2.2463(12) |
| Au(1)-S(1)   | 2.2968(15) |
| S(1)-C(1)    | 1.743(6)   |
| P(1)-C(19)   | 1.835(5)   |
| P(1)-C(7)    | 1.848(5)   |
| P(1)-C(13)   | 1.854(5)   |
| F(1)-C(2)    | 1.350(7)   |
| F(2)-C(3)    | 1.359(7)   |
| F(3)-C(5)    | 1.360(7)   |
| F(4)-C(6)    | 1.340(6)   |
| F(5)-C(40)   | 1.355(9)   |
| F(6)-C(40)   | 1.313(8)   |
| F(7)-C(40)   | 1.322(8)   |
| C(1)-C(6)    | 1.385(8)   |
| C(1)-C(2)    | 1.388(9)   |
| C(2)-C(3)    | 1.351(9)   |
| C(3)-C(4)    | 1.348(9)   |
| C(4)-C(5)    | 1.383(9)   |
| C(4)-C(40)   | 1.487(9)   |
| C(5)-C(6)    | 1.380(8)   |
| C(7)-C(8)    | 1.529(6)   |
| C(7)-C(12)   | 1.532(6)   |
| C(7)-H(7)    | 1.0000     |
| C(8)-C(9)    | 1.526(7)   |
| C(8)-H(8A)   | 0.9900     |
| C(8)-H(8B)   | 0.9900     |
| C(9)-C(10)   | 1.521(7)   |
| C(9)-H(9A)   | 0.9900     |
| C(9)-H(9B)   | 0.9900     |
| C(10)-C(11)  | 1.525(8)   |
| C(10)-H(10A) | 0.9900     |
| C(10)-H(10B) | 0.9900     |
| C(11)-C(12)  | 1.531(7)   |
| C(11)-H(11A) | 0.9900     |
| C(11)-H(11B) | 0.9900     |
| C(12)-H(12A) | 0.9900     |
| C(12)-H(12B) | 0.9900     |
| C(13)-C(14)  | 1.532(7)   |
| C(13)-C(18)  | 1.532(7)   |
| C(13)-H(13)  | 1.0000     |
| C(14)-C(15)  | 1.522(8)   |
| C(14)-H(14A) | 0.9900     |
| C(14)-H(14B) | 0.9900     |
| C(15)-C(16)  | 1.513(8)   |
| C(15)-H(15A) | 0.9900     |
| C(15)-H(15B) | 0.9900     |
| C(16)-C(17)  | 1.527(8)   |



|              |          |
|--------------|----------|
| C(16)-H(16A) | 0.9900   |
| C(16)-H(16B) | 0.9900   |
| C(17)-C(18)  | 1.529(7) |
| C(17)-H(17A) | 0.9900   |
| C(17)-H(17B) | 0.9900   |
| C(18)-H(18A) | 0.9900   |
| C(18)-H(18B) | 0.9900   |
| C(19)-C(24)  | 1.396(6) |
| C(19)-C(20)  | 1.401(6) |
| C(20)-C(21)  | 1.384(6) |
| C(20)-H(20)  | 0.9500   |
| C(21)-C(22)  | 1.387(7) |
| C(21)-H(21)  | 0.9500   |
| C(22)-C(23)  | 1.374(7) |
| C(22)-H(22)  | 0.9500   |
| C(23)-C(24)  | 1.394(6) |
| C(23)-H(23)  | 0.9500   |
| C(24)-C(25)  | 1.516(6) |
| C(25)-C(26)  | 1.392(6) |
| C(25)-C(30)  | 1.410(6) |
| C(26)-C(27)  | 1.401(7) |
| C(26)-C(31)  | 1.524(6) |
| C(27)-C(28)  | 1.384(7) |
| C(27)-H(27)  | 0.9500   |
| C(28)-C(29)  | 1.382(7) |
| C(28)-C(34)  | 1.520(6) |
| C(29)-C(30)  | 1.400(6) |
| C(29)-H(29)  | 0.9500   |
| C(30)-C(37)  | 1.525(7) |
| C(31)-C(32)  | 1.528(7) |
| C(31)-C(33)  | 1.534(7) |
| C(31)-H(31)  | 1.0000   |
| C(32)-H(32A) | 0.9800   |
| C(32)-H(32B) | 0.9800   |
| C(32)-H(32C) | 0.9800   |
| C(33)-H(33A) | 0.9800   |
| C(33)-H(33B) | 0.9800   |
| C(33)-H(33C) | 0.9800   |
| C(34)-C(36)  | 1.519(7) |
| C(34)-C(35)  | 1.526(7) |
| C(34)-H(34)  | 1.0000   |
| C(35)-H(35A) | 0.9800   |
| C(35)-H(35B) | 0.9800   |
| C(35)-H(35C) | 0.9800   |
| C(36)-H(36A) | 0.9800   |
| C(36)-H(36B) | 0.9800   |
| C(36)-H(36C) | 0.9800   |
| C(37)-C(39)  | 1.516(7) |
| C(37)-C(38)  | 1.524(7) |

|                  |            |
|------------------|------------|
| C(37)-H(37)      | 1.0000     |
| C(38)-H(38A)     | 0.9800     |
| C(38)-H(38B)     | 0.9800     |
| C(38)-H(38C)     | 0.9800     |
| C(39)-H(39A)     | 0.9800     |
| C(39)-H(39B)     | 0.9800     |
| C(39)-H(39C)     | 0.9800     |
|                  |            |
| P(1)-Au(1)-S(1)  | 174.44(6)  |
| C(1)-S(1)-Au(1)  | 101.30(19) |
| C(19)-P(1)-C(7)  | 104.6(2)   |
| C(19)-P(1)-C(13) | 104.5(2)   |
| C(7)-P(1)-C(13)  | 109.9(2)   |
| C(19)-P(1)-Au(1) | 115.80(15) |
| C(7)-P(1)-Au(1)  | 107.86(16) |
| C(13)-P(1)-Au(1) | 113.72(16) |
| C(6)-C(1)-C(2)   | 114.7(5)   |
| C(6)-C(1)-S(1)   | 124.7(5)   |
| C(2)-C(1)-S(1)   | 120.6(5)   |
| F(1)-C(2)-C(3)   | 118.0(6)   |
| F(1)-C(2)-C(1)   | 118.6(6)   |
| C(3)-C(2)-C(1)   | 123.4(6)   |
| C(4)-C(3)-C(2)   | 122.3(6)   |
| C(4)-C(3)-F(2)   | 121.8(6)   |
| C(2)-C(3)-F(2)   | 115.9(6)   |
| C(3)-C(4)-C(5)   | 116.0(6)   |
| C(3)-C(4)-C(40)  | 125.1(6)   |
| C(5)-C(4)-C(40)  | 118.9(6)   |
| F(3)-C(5)-C(6)   | 117.2(6)   |
| F(3)-C(5)-C(4)   | 120.4(6)   |
| C(6)-C(5)-C(4)   | 122.4(6)   |
| F(4)-C(6)-C(5)   | 118.8(5)   |
| F(4)-C(6)-C(1)   | 120.1(5)   |
| C(5)-C(6)-C(1)   | 121.1(6)   |
| C(8)-C(7)-C(12)  | 110.5(4)   |
| C(8)-C(7)-P(1)   | 108.3(3)   |
| C(12)-C(7)-P(1)  | 111.6(3)   |
| C(8)-C(7)-H(7)   | 108.8      |
| C(12)-C(7)-H(7)  | 108.8      |
| P(1)-C(7)-H(7)   | 108.8      |
| C(9)-C(8)-C(7)   | 112.3(4)   |
| C(9)-C(8)-H(8A)  | 109.1      |
| C(7)-C(8)-H(8A)  | 109.1      |
| C(9)-C(8)-H(8B)  | 109.1      |
| C(7)-C(8)-H(8B)  | 109.1      |
| H(8A)-C(8)-H(8B) | 107.9      |
| C(10)-C(9)-C(8)  | 110.8(4)   |
| C(10)-C(9)-H(9A) | 109.5      |
| C(8)-C(9)-H(9A)  | 109.5      |

|                     |          |
|---------------------|----------|
| C(10)-C(9)-H(9B)    | 109.5    |
| C(8)-C(9)-H(9B)     | 109.5    |
| H(9A)-C(9)-H(9B)    | 108.1    |
| C(9)-C(10)-C(11)    | 111.2(4) |
| C(9)-C(10)-H(10A)   | 109.4    |
| C(11)-C(10)-H(10A)  | 109.4    |
| C(9)-C(10)-H(10B)   | 109.4    |
| C(11)-C(10)-H(10B)  | 109.4    |
| H(10A)-C(10)-H(10B) | 108.0    |
| C(10)-C(11)-C(12)   | 110.9(4) |
| C(10)-C(11)-H(11A)  | 109.5    |
| C(12)-C(11)-H(11A)  | 109.5    |
| C(10)-C(11)-H(11B)  | 109.5    |
| C(12)-C(11)-H(11B)  | 109.5    |
| H(11A)-C(11)-H(11B) | 108.1    |
| C(11)-C(12)-C(7)    | 110.0(4) |
| C(11)-C(12)-H(12A)  | 109.7    |
| C(7)-C(12)-H(12A)   | 109.7    |
| C(11)-C(12)-H(12B)  | 109.7    |
| C(7)-C(12)-H(12B)   | 109.7    |
| H(12A)-C(12)-H(12B) | 108.2    |
| C(14)-C(13)-C(18)   | 112.0(4) |
| C(14)-C(13)-P(1)    | 112.9(3) |
| C(18)-C(13)-P(1)    | 114.1(3) |
| C(14)-C(13)-H(13)   | 105.7    |
| C(18)-C(13)-H(13)   | 105.7    |
| P(1)-C(13)-H(13)    | 105.7    |
| C(15)-C(14)-C(13)   | 110.7(4) |
| C(15)-C(14)-H(14A)  | 109.5    |
| C(13)-C(14)-H(14A)  | 109.5    |
| C(15)-C(14)-H(14B)  | 109.5    |
| C(13)-C(14)-H(14B)  | 109.5    |
| H(14A)-C(14)-H(14B) | 108.1    |
| C(16)-C(15)-C(14)   | 110.9(5) |
| C(16)-C(15)-H(15A)  | 109.5    |
| C(14)-C(15)-H(15A)  | 109.5    |
| C(16)-C(15)-H(15B)  | 109.5    |
| C(14)-C(15)-H(15B)  | 109.5    |
| H(15A)-C(15)-H(15B) | 108.0    |
| C(15)-C(16)-C(17)   | 110.5(5) |
| C(15)-C(16)-H(16A)  | 109.5    |
| C(17)-C(16)-H(16A)  | 109.5    |
| C(15)-C(16)-H(16B)  | 109.5    |
| C(17)-C(16)-H(16B)  | 109.5    |
| H(16A)-C(16)-H(16B) | 108.1    |
| C(16)-C(17)-C(18)   | 111.0(5) |
| C(16)-C(17)-H(17A)  | 109.4    |
| C(18)-C(17)-H(17A)  | 109.4    |
| C(16)-C(17)-H(17B)  | 109.4    |

|                     |          |
|---------------------|----------|
| C(18)-C(17)-H(17B)  | 109.4    |
| H(17A)-C(17)-H(17B) | 108.0    |
| C(17)-C(18)-C(13)   | 110.7(4) |
| C(17)-C(18)-H(18A)  | 109.5    |
| C(13)-C(18)-H(18A)  | 109.5    |
| C(17)-C(18)-H(18B)  | 109.5    |
| C(13)-C(18)-H(18B)  | 109.5    |
| H(18A)-C(18)-H(18B) | 108.1    |
| C(24)-C(19)-C(20)   | 119.0(4) |
| C(24)-C(19)-P(1)    | 122.4(3) |
| C(20)-C(19)-P(1)    | 118.7(3) |
| C(21)-C(20)-C(19)   | 121.7(4) |
| C(21)-C(20)-H(20)   | 119.2    |
| C(19)-C(20)-H(20)   | 119.2    |
| C(20)-C(21)-C(22)   | 118.9(4) |
| C(20)-C(21)-H(21)   | 120.6    |
| C(22)-C(21)-H(21)   | 120.6    |
| C(23)-C(22)-C(21)   | 119.9(4) |
| C(23)-C(22)-H(22)   | 120.0    |
| C(21)-C(22)-H(22)   | 120.0    |
| C(22)-C(23)-C(24)   | 121.9(4) |
| C(22)-C(23)-H(23)   | 119.0    |
| C(24)-C(23)-H(23)   | 119.0    |
| C(23)-C(24)-C(19)   | 118.6(4) |
| C(23)-C(24)-C(25)   | 116.7(4) |
| C(19)-C(24)-C(25)   | 124.7(4) |
| C(26)-C(25)-C(30)   | 120.4(4) |
| C(26)-C(25)-C(24)   | 120.8(4) |
| C(30)-C(25)-C(24)   | 118.6(4) |
| C(25)-C(26)-C(27)   | 118.8(4) |
| C(25)-C(26)-C(31)   | 121.6(4) |
| C(27)-C(26)-C(31)   | 119.5(4) |
| C(28)-C(27)-C(26)   | 122.1(4) |
| C(28)-C(27)-H(27)   | 118.9    |
| C(26)-C(27)-H(27)   | 118.9    |
| C(29)-C(28)-C(27)   | 118.1(4) |
| C(29)-C(28)-C(34)   | 121.9(4) |
| C(27)-C(28)-C(34)   | 120.0(4) |
| C(28)-C(29)-C(30)   | 122.2(4) |
| C(28)-C(29)-H(29)   | 118.9    |
| C(30)-C(29)-H(29)   | 118.9    |
| C(29)-C(30)-C(25)   | 118.4(4) |
| C(29)-C(30)-C(37)   | 119.5(4) |
| C(25)-C(30)-C(37)   | 122.1(4) |
| C(26)-C(31)-C(32)   | 113.1(4) |
| C(26)-C(31)-C(33)   | 110.3(4) |
| C(32)-C(31)-C(33)   | 110.2(4) |
| C(26)-C(31)-H(31)   | 107.7    |
| C(32)-C(31)-H(31)   | 107.7    |

|                     |          |
|---------------------|----------|
| C(33)-C(31)-H(31)   | 107.7    |
| C(31)-C(32)-H(32A)  | 109.5    |
| C(31)-C(32)-H(32B)  | 109.5    |
| H(32A)-C(32)-H(32B) | 109.5    |
| C(31)-C(32)-H(32C)  | 109.5    |
| H(32A)-C(32)-H(32C) | 109.5    |
| H(32B)-C(32)-H(32C) | 109.5    |
| C(31)-C(33)-H(33A)  | 109.5    |
| C(31)-C(33)-H(33B)  | 109.5    |
| H(33A)-C(33)-H(33B) | 109.5    |
| C(31)-C(33)-H(33C)  | 109.5    |
| H(33A)-C(33)-H(33C) | 109.5    |
| H(33B)-C(33)-H(33C) | 109.5    |
| C(36)-C(34)-C(28)   | 112.6(4) |
| C(36)-C(34)-C(35)   | 110.8(5) |
| C(28)-C(34)-C(35)   | 110.6(4) |
| C(36)-C(34)-H(34)   | 107.5    |
| C(28)-C(34)-H(34)   | 107.5    |
| C(35)-C(34)-H(34)   | 107.5    |
| C(34)-C(35)-H(35A)  | 109.5    |
| C(34)-C(35)-H(35B)  | 109.5    |
| H(35A)-C(35)-H(35B) | 109.5    |
| C(34)-C(35)-H(35C)  | 109.5    |
| H(35A)-C(35)-H(35C) | 109.5    |
| H(35B)-C(35)-H(35C) | 109.5    |
| C(34)-C(36)-H(36A)  | 109.5    |
| C(34)-C(36)-H(36B)  | 109.5    |
| H(36A)-C(36)-H(36B) | 109.5    |
| C(34)-C(36)-H(36C)  | 109.5    |
| H(36A)-C(36)-H(36C) | 109.5    |
| H(36B)-C(36)-H(36C) | 109.5    |
| C(39)-C(37)-C(38)   | 110.2(4) |
| C(39)-C(37)-C(30)   | 113.2(4) |
| C(38)-C(37)-C(30)   | 109.9(4) |
| C(39)-C(37)-H(37)   | 107.8    |
| C(38)-C(37)-H(37)   | 107.8    |
| C(30)-C(37)-H(37)   | 107.8    |
| C(37)-C(38)-H(38A)  | 109.5    |
| C(37)-C(38)-H(38B)  | 109.5    |
| H(38A)-C(38)-H(38B) | 109.5    |
| C(37)-C(38)-H(38C)  | 109.5    |
| H(38A)-C(38)-H(38C) | 109.5    |
| H(38B)-C(38)-H(38C) | 109.5    |
| C(37)-C(39)-H(39A)  | 109.5    |
| C(37)-C(39)-H(39B)  | 109.5    |
| H(39A)-C(39)-H(39B) | 109.5    |
| C(37)-C(39)-H(39C)  | 109.5    |
| H(39A)-C(39)-H(39C) | 109.5    |
| H(39B)-C(39)-H(39C) | 109.5    |

|                 |          |
|-----------------|----------|
| F(6)-C(40)-F(7) | 107.1(6) |
| F(6)-C(40)-F(5) | 104.8(6) |
| F(7)-C(40)-F(5) | 104.7(6) |
| F(6)-C(40)-C(4) | 113.2(6) |
| F(7)-C(40)-C(4) | 114.1(6) |
| F(5)-C(40)-C(4) | 112.2(6) |

---

Symmetry transformations used to generate equivalent atoms:

Table S8. Anisotropic displacement parameters ( $\text{\AA}^2 \times 10^3$ ) for cldr07. The anisotropic displacement factor exponent takes the form:  $-2\pi^2 [h^2 a^{*2} U^{11} + \dots + 2 h k a^* b^* U^{12}]$

|       | $U^{11}$ | $U^{22}$ | $U^{33}$ | $U^{23}$ | $U^{13}$ | $U^{12}$ |
|-------|----------|----------|----------|----------|----------|----------|
| Au(1) | 21(1)    | 32(1)    | 31(1)    | 12(1)    | -3(1)    | -7(1)    |
| S(1)  | 34(1)    | 72(1)    | 61(1)    | 46(1)    | -13(1)   | -19(1)   |
| P(1)  | 18(1)    | 19(1)    | 20(1)    | 3(1)     | -2(1)    | -2(1)    |
| F(1)  | 94(3)    | 70(3)    | 39(2)    | -8(2)    | 1(2)     | -19(2)   |
| F(2)  | 79(3)    | 63(3)    | 73(3)    | -9(2)    | 32(2)    | 6(2)     |
| F(3)  | 77(3)    | 59(2)    | 48(2)    | 7(2)     | -22(2)   | -5(2)    |
| F(4)  | 67(3)    | 60(2)    | 46(2)    | 3(2)     | 20(2)    | 1(2)     |
| F(5)  | 59(3)    | 149(5)   | 80(3)    | 12(3)    | 20(3)    | 17(3)    |
| F(6)  | 55(3)    | 62(3)    | 154(5)   | -4(3)    | -36(3)   | -5(2)    |
| F(7)  | 55(2)    | 71(3)    | 73(3)    | 27(2)    | -2(2)    | 20(2)    |
| C(1)  | 38(3)    | 38(3)    | 35(3)    | 11(3)    | 2(2)     | -10(3)   |
| C(2)  | 60(4)    | 38(3)    | 38(3)    | 3(3)     | 1(3)     | -14(3)   |
| C(3)  | 50(4)    | 31(3)    | 51(4)    | 2(3)     | 21(3)    | 0(3)     |
| C(4)  | 34(3)    | 35(3)    | 68(5)    | 19(3)    | 10(3)    | -1(3)    |
| C(5)  | 50(4)    | 34(3)    | 38(3)    | 8(3)     | -11(3)   | -2(3)    |
| C(6)  | 44(3)    | 36(3)    | 33(3)    | 5(2)     | 9(3)     | -4(3)    |
| C(7)  | 23(2)    | 20(2)    | 21(2)    | 1(2)     | -5(2)    | 2(2)     |
| C(8)  | 28(3)    | 24(2)    | 28(3)    | -2(2)    | -1(2)    | 5(2)     |
| C(9)  | 38(3)    | 31(3)    | 30(3)    | -6(2)    | 2(2)     | -2(2)    |
| C(10) | 39(3)    | 37(3)    | 34(3)    | -9(2)    | -9(2)    | -10(3)   |
| C(11) | 30(3)    | 43(3)    | 35(3)    | -4(3)    | -14(2)   | 3(2)     |
| C(12) | 19(2)    | 31(3)    | 30(3)    | 0(2)     | -7(2)    | -1(2)    |
| C(13) | 22(2)    | 22(2)    | 25(2)    | -1(2)    | 2(2)     | 1(2)     |
| C(14) | 25(3)    | 34(3)    | 37(3)    | 3(2)     | 8(2)     | -1(2)    |
| C(15) | 31(3)    | 40(3)    | 53(4)    | 1(3)     | 15(3)    | 9(3)     |
| C(16) | 34(3)    | 31(3)    | 57(4)    | 5(3)     | 3(3)     | 9(3)     |
| C(17) | 46(3)    | 21(2)    | 42(3)    | 4(2)     | 12(3)    | 6(2)     |
| C(18) | 35(3)    | 22(2)    | 29(3)    | 2(2)     | 4(2)     | 3(2)     |
| C(19) | 20(2)    | 16(2)    | 22(2)    | 0(2)     | 1(2)     | -1(2)    |
| C(20) | 22(2)    | 22(2)    | 18(2)    | -2(2)    | -1(2)    | 1(2)     |
| C(21) | 27(2)    | 26(2)    | 25(2)    | 0(2)     | 9(2)     | -6(2)    |
| C(22) | 17(2)    | 30(3)    | 33(3)    | -2(2)    | 3(2)     | -6(2)    |
| C(23) | 21(2)    | 29(3)    | 24(2)    | -2(2)    | -4(2)    | 0(2)     |
| C(24) | 21(2)    | 15(2)    | 21(2)    | -1(2)    | -2(2)    | -3(2)    |
| C(25) | 15(2)    | 23(2)    | 21(2)    | 2(2)     | -3(2)    | -4(2)    |
| C(26) | 19(2)    | 23(2)    | 20(2)    | -1(2)    | -2(2)    | -2(2)    |
| C(27) | 25(2)    | 25(2)    | 22(2)    | -2(2)    | 2(2)     | -1(2)    |
| C(28) | 22(2)    | 30(3)    | 20(2)    | 2(2)     | 0(2)     | -3(2)    |
| C(29) | 23(2)    | 23(2)    | 22(2)    | 4(2)     | 0(2)     | -2(2)    |
| C(30) | 18(2)    | 24(2)    | 20(2)    | -3(2)    | -3(2)    | -3(2)    |
| C(31) | 30(3)    | 18(2)    | 24(2)    | 0(2)     | -1(2)    | -2(2)    |
| C(32) | 41(3)    | 28(3)    | 34(3)    | -3(2)    | 5(2)     | 5(2)     |
| C(33) | 45(3)    | 27(3)    | 49(4)    | 0(3)     | -9(3)    | -10(3)   |
| C(34) | 31(3)    | 32(3)    | 19(2)    | 3(2)     | 9(2)     | 2(2)     |

|       |       |       |       |        |       |        |
|-------|-------|-------|-------|--------|-------|--------|
| C(35) | 43(3) | 68(4) | 30(3) | 18(3)  | 5(3)  | 8(3)   |
| C(36) | 47(4) | 42(3) | 38(3) | -1(3)  | 19(3) | -12(3) |
| C(37) | 31(3) | 23(2) | 20(2) | 0(2)   | -1(2) | 1(2)   |
| C(38) | 41(3) | 50(4) | 43(3) | -18(3) | -1(3) | 7(3)   |
| C(39) | 50(3) | 25(3) | 31(3) | -5(2)  | 4(3)  | -3(2)  |
| C(40) | 50(4) | 51(4) | 72(5) | 12(4)  | 7(4)  | 4(3)   |

---



Table S9. Torsion angles [°] for cldr07.

|                         |           |
|-------------------------|-----------|
| Au(1)-S(1)-C(1)-C(6)    | 61.7(5)   |
| Au(1)-S(1)-C(1)-C(2)    | -120.9(5) |
| C(6)-C(1)-C(2)-F(1)     | 178.7(5)  |
| S(1)-C(1)-C(2)-F(1)     | 1.1(8)    |
| C(6)-C(1)-C(2)-C(3)     | -1.9(9)   |
| S(1)-C(1)-C(2)-C(3)     | -179.6(5) |
| F(1)-C(2)-C(3)-C(4)     | -178.8(5) |
| C(1)-C(2)-C(3)-C(4)     | 1.8(10)   |
| F(1)-C(2)-C(3)-F(2)     | -0.3(8)   |
| C(1)-C(2)-C(3)-F(2)     | -179.6(5) |
| C(2)-C(3)-C(4)-C(5)     | -0.9(9)   |
| F(2)-C(3)-C(4)-C(5)     | -179.4(5) |
| C(2)-C(3)-C(4)-C(40)    | 178.4(6)  |
| F(2)-C(3)-C(4)-C(40)    | 0.0(10)   |
| C(3)-C(4)-C(5)-F(3)     | 179.3(5)  |
| C(40)-C(4)-C(5)-F(3)    | -0.1(9)   |
| C(3)-C(4)-C(5)-C(6)     | 0.3(9)    |
| C(40)-C(4)-C(5)-C(6)    | -179.1(6) |
| F(3)-C(5)-C(6)-F(4)     | 0.8(8)    |
| C(4)-C(5)-C(6)-F(4)     | 179.9(5)  |
| F(3)-C(5)-C(6)-C(1)     | -179.6(5) |
| C(4)-C(5)-C(6)-C(1)     | -0.6(9)   |
| C(2)-C(1)-C(6)-F(4)     | -179.2(5) |
| S(1)-C(1)-C(6)-F(4)     | -1.6(8)   |
| C(2)-C(1)-C(6)-C(5)     | 1.3(8)    |
| S(1)-C(1)-C(6)-C(5)     | 178.8(5)  |
| C(19)-P(1)-C(7)-C(8)    | 66.2(4)   |
| C(13)-P(1)-C(7)-C(8)    | 177.9(3)  |
| Au(1)-P(1)-C(7)-C(8)    | -57.6(3)  |
| C(19)-P(1)-C(7)-C(12)   | -171.9(3) |
| C(13)-P(1)-C(7)-C(12)   | -60.2(4)  |
| Au(1)-P(1)-C(7)-C(12)   | 64.3(3)   |
| C(12)-C(7)-C(8)-C(9)    | 55.3(6)   |
| P(1)-C(7)-C(8)-C(9)     | 177.8(4)  |
| C(7)-C(8)-C(9)-C(10)    | -54.3(6)  |
| C(8)-C(9)-C(10)-C(11)   | 55.0(6)   |
| C(9)-C(10)-C(11)-C(12)  | -57.6(6)  |
| C(10)-C(11)-C(12)-C(7)  | 58.1(6)   |
| C(8)-C(7)-C(12)-C(11)   | -56.5(5)  |
| P(1)-C(7)-C(12)-C(11)   | -177.1(3) |
| C(19)-P(1)-C(13)-C(14)  | -158.3(4) |
| C(7)-P(1)-C(13)-C(14)   | 89.9(4)   |
| Au(1)-P(1)-C(13)-C(14)  | -31.1(4)  |
| C(19)-P(1)-C(13)-C(18)  | 72.3(4)   |
| C(7)-P(1)-C(13)-C(18)   | -39.4(4)  |
| Au(1)-P(1)-C(13)-C(18)  | -160.4(3) |
| C(18)-C(13)-C(14)-C(15) | -54.4(6)  |

|                         |           |
|-------------------------|-----------|
| P(1)-C(13)-C(14)-C(15)  | 175.2(4)  |
| C(13)-C(14)-C(15)-C(16) | 56.6(6)   |
| C(14)-C(15)-C(16)-C(17) | -58.5(6)  |
| C(15)-C(16)-C(17)-C(18) | 57.9(7)   |
| C(16)-C(17)-C(18)-C(13) | -55.2(6)  |
| C(14)-C(13)-C(18)-C(17) | 53.7(6)   |
| P(1)-C(13)-C(18)-C(17)  | -176.5(4) |
| C(7)-P(1)-C(19)-C(24)   | -145.0(4) |
| C(13)-P(1)-C(19)-C(24)  | 99.5(4)   |
| Au(1)-P(1)-C(19)-C(24)  | -26.4(4)  |
| C(7)-P(1)-C(19)-C(20)   | 36.1(4)   |
| C(13)-P(1)-C(19)-C(20)  | -79.4(4)  |
| Au(1)-P(1)-C(19)-C(20)  | 154.7(3)  |
| C(24)-C(19)-C(20)-C(21) | -0.1(7)   |
| P(1)-C(19)-C(20)-C(21)  | 178.7(4)  |
| C(19)-C(20)-C(21)-C(22) | 0.2(7)    |
| C(20)-C(21)-C(22)-C(23) | -0.4(7)   |
| C(21)-C(22)-C(23)-C(24) | 0.5(8)    |
| C(22)-C(23)-C(24)-C(19) | -0.5(7)   |
| C(22)-C(23)-C(24)-C(25) | 178.0(4)  |
| C(20)-C(19)-C(24)-C(23) | 0.3(6)    |
| P(1)-C(19)-C(24)-C(23)  | -178.5(3) |
| C(20)-C(19)-C(24)-C(25) | -178.1(4) |
| P(1)-C(19)-C(24)-C(25)  | 3.1(6)    |
| C(23)-C(24)-C(25)-C(26) | 90.5(5)   |
| C(19)-C(24)-C(25)-C(26) | -91.1(5)  |
| C(23)-C(24)-C(25)-C(30) | -84.8(5)  |
| C(19)-C(24)-C(25)-C(30) | 93.6(5)   |
| C(30)-C(25)-C(26)-C(27) | -1.1(6)   |
| C(24)-C(25)-C(26)-C(27) | -176.3(4) |
| C(30)-C(25)-C(26)-C(31) | 176.0(4)  |
| C(24)-C(25)-C(26)-C(31) | 0.8(6)    |
| C(25)-C(26)-C(27)-C(28) | 0.7(7)    |
| C(31)-C(26)-C(27)-C(28) | -176.5(4) |
| C(26)-C(27)-C(28)-C(29) | 0.2(7)    |
| C(26)-C(27)-C(28)-C(34) | 178.6(4)  |
| C(27)-C(28)-C(29)-C(30) | -0.8(7)   |
| C(34)-C(28)-C(29)-C(30) | -179.1(4) |
| C(28)-C(29)-C(30)-C(25) | 0.3(7)    |
| C(28)-C(29)-C(30)-C(37) | 177.4(4)  |
| C(26)-C(25)-C(30)-C(29) | 0.6(6)    |
| C(24)-C(25)-C(30)-C(29) | 175.9(4)  |
| C(26)-C(25)-C(30)-C(37) | -176.3(4) |
| C(24)-C(25)-C(30)-C(37) | -1.1(6)   |
| C(25)-C(26)-C(31)-C(32) | 135.5(5)  |
| C(27)-C(26)-C(31)-C(32) | -47.4(6)  |
| C(25)-C(26)-C(31)-C(33) | -100.6(5) |
| C(27)-C(26)-C(31)-C(33) | 76.4(6)   |
| C(29)-C(28)-C(34)-C(36) | -55.8(6)  |

|                         |           |
|-------------------------|-----------|
| C(27)-C(28)-C(34)-C(36) | 125.9(5)  |
| C(29)-C(28)-C(34)-C(35) | 68.8(6)   |
| C(27)-C(28)-C(34)-C(35) | -109.5(6) |
| C(29)-C(30)-C(37)-C(39) | 46.1(6)   |
| C(25)-C(30)-C(37)-C(39) | -137.0(5) |
| C(29)-C(30)-C(37)-C(38) | -77.6(6)  |
| C(25)-C(30)-C(37)-C(38) | 99.3(5)   |
| C(3)-C(4)-C(40)-F(6)    | -119.7(8) |
| C(5)-C(4)-C(40)-F(6)    | 59.6(9)   |
| C(3)-C(4)-C(40)-F(7)    | 117.5(7)  |
| C(5)-C(4)-C(40)-F(7)    | -63.2(9)  |
| C(3)-C(4)-C(40)-F(5)    | -1.4(10)  |
| C(5)-C(4)-C(40)-F(5)    | 178.0(6)  |

---

## Compound 2.

Table S10. Crystal data and structure refinement for cldr01.

|                                   |                                                       |                 |
|-----------------------------------|-------------------------------------------------------|-----------------|
| Identification code               | cldr01                                                |                 |
| Empirical formula                 | C <sub>39</sub> H <sub>49</sub> Au F <sub>5</sub> P S |                 |
| Formula weight                    | 872.78                                                |                 |
| Temperature                       | 130(2) K                                              |                 |
| Wavelength                        | 0.71073 Å                                             |                 |
| Crystal system                    | Monoclinic                                            |                 |
| Space group                       | P 21/c                                                |                 |
| Unit cell dimensions              | a = 11.9863(4) Å                                      | α = 90°.        |
|                                   | b = 16.3217(5) Å                                      | β = 95.632(3)°. |
|                                   | c = 18.9934(5) Å                                      | γ = 90°.        |
| Volume                            | 3697.87(19) Å <sup>3</sup>                            |                 |
| Z                                 | 4                                                     |                 |
| Density (calculated)              | 1.568 Mg/m <sup>3</sup>                               |                 |
| Absorption coefficient            | 4.130 mm <sup>-1</sup>                                |                 |
| F(000)                            | 1752                                                  |                 |
| Crystal size                      | 0.4292 x 0.2812 x 0.2502 mm <sup>3</sup>              |                 |
| Theta range for data collection   | 3.616 to 29.526°.                                     |                 |
| Index ranges                      | -16 ≤ h ≤ 13, -13 ≤ k ≤ 22, -24 ≤ l ≤ 21              |                 |
| Reflections collected             | 19400                                                 |                 |
| Independent reflections           | 8733 [R(int) = 0.0294]                                |                 |
| Completeness to theta = 25.242°   | 99.7 %                                                |                 |
| Absorption correction             | Analytical                                            |                 |
| Max. and min. transmission        | 0.435 and 0.312                                       |                 |
| Refinement method                 | Full-matrix least-squares on F <sup>2</sup>           |                 |
| Data / restraints / parameters    | 8733 / 0 / 430                                        |                 |
| Goodness-of-fit on F <sup>2</sup> | 1.074                                                 |                 |
| Final R indices [I > 2σ(I)]       | R1 = 0.0284, wR2 = 0.0581                             |                 |
| R indices (all data)              | R1 = 0.0384, wR2 = 0.0630                             |                 |
| Extinction coefficient            | n/a                                                   |                 |
| Largest diff. peak and hole       | 1.206 and -1.128 e.Å <sup>-3</sup>                    |                 |

Table S11. Atomic coordinates ( $\times 10^4$ ) and equivalent isotropic displacement parameters ( $\text{\AA}^2 \times 10^3$ ) for cldr01. U(eq) is defined as one third of the trace of the orthogonalized  $U^{ij}$  tensor.

|       | x        | y       | z        | U(eq) |
|-------|----------|---------|----------|-------|
| Au(1) | 6243(1)  | 4903(1) | 7791(1)  | 18(1) |
| S(1)  | 6080(1)  | 5842(1) | 8683(1)  | 27(1) |
| P(1)  | 6415(1)  | 3942(1) | 6952(1)  | 16(1) |
| F(1)  | 4991(2)  | 6944(1) | 9611(1)  | 36(1) |
| F(2)  | 3108(2)  | 6750(2) | 10227(1) | 50(1) |
| F(3)  | 1943(2)  | 5317(2) | 10094(1) | 54(1) |
| F(4)  | 2746(2)  | 4067(2) | 9332(1)  | 45(1) |
| F(5)  | 4593(2)  | 4246(1) | 8696(1)  | 35(1) |
| C(1)  | 4871(3)  | 5617(2) | 9102(1)  | 23(1) |
| C(2)  | 4458(3)  | 6222(2) | 9524(2)  | 27(1) |
| C(3)  | 3477(3)  | 6122(2) | 9850(2)  | 34(1) |
| C(4)  | 2895(3)  | 5410(3) | 9787(2)  | 36(1) |
| C(5)  | 3296(3)  | 4785(2) | 9394(2)  | 31(1) |
| C(6)  | 4268(3)  | 4893(2) | 9064(2)  | 26(1) |
| C(7)  | 6888(3)  | 2961(2) | 7360(1)  | 20(1) |
| C(8)  | 6397(3)  | 2798(2) | 8064(2)  | 28(1) |
| C(9)  | 6891(3)  | 2021(2) | 8418(2)  | 37(1) |
| C(10) | 6776(3)  | 1284(2) | 7929(2)  | 40(1) |
| C(11) | 7270(3)  | 1455(2) | 7239(2)  | 33(1) |
| C(12) | 6740(3)  | 2214(2) | 6874(2)  | 26(1) |
| C(13) | 5088(2)  | 3767(2) | 6400(1)  | 17(1) |
| C(14) | 4143(3)  | 3507(2) | 6837(2)  | 25(1) |
| C(15) | 3065(3)  | 3363(2) | 6355(2)  | 27(1) |
| C(16) | 2725(3)  | 4107(2) | 5908(2)  | 27(1) |
| C(17) | 3670(3)  | 4389(2) | 5489(2)  | 27(1) |
| C(18) | 4749(3)  | 4538(2) | 5970(2)  | 23(1) |
| C(19) | 7445(2)  | 4131(2) | 6316(1)  | 15(1) |
| C(20) | 7338(3)  | 3707(2) | 5671(1)  | 19(1) |
| C(21) | 8134(3)  | 3774(2) | 5194(1)  | 23(1) |
| C(22) | 9071(3)  | 4256(2) | 5358(2)  | 25(1) |
| C(23) | 9176(3)  | 4691(2) | 5989(2)  | 23(1) |
| C(24) | 8369(2)  | 4647(2) | 6470(1)  | 17(1) |
| C(25) | 8552(2)  | 5191(2) | 7113(1)  | 17(1) |
| C(26) | 8132(2)  | 5992(2) | 7078(1)  | 17(1) |
| C(27) | 8387(2)  | 6512(2) | 7651(1)  | 20(1) |
| C(28) | 9055(2)  | 6260(2) | 8257(2)  | 20(1) |
| C(29) | 9452(2)  | 5463(2) | 8281(2)  | 20(1) |
| C(30) | 9223(3)  | 4921(2) | 7716(2)  | 18(1) |
| C(31) | 7438(3)  | 6320(2) | 6418(2)  | 21(1) |
| C(32) | 8163(3)  | 6826(2) | 5966(2)  | 35(1) |
| C(33) | 6420(3)  | 6809(2) | 6591(2)  | 34(1) |
| C(34) | 9731(3)  | 4070(2) | 7768(2)  | 24(1) |
| C(35) | 9528(3)  | 3635(2) | 8456(2)  | 35(1) |
| C(36) | 10993(3) | 4110(3) | 7691(2)  | 39(1) |

|       |          |         |         |       |
|-------|----------|---------|---------|-------|
| C(37) | 9363(3)  | 6856(2) | 8858(2) | 27(1) |
| C(38) | 10617(4) | 7061(3) | 8891(3) | 69(2) |
| C(39) | 9104(4)  | 6546(3) | 9561(2) | 65(2) |

---

Table S12. Bond lengths [Å] and angles [°] for cldr01.

---

|              |           |
|--------------|-----------|
| Au(1)-P(1)   | 2.2608(8) |
| Au(1)-S(1)   | 2.3067(8) |
| S(1)-C(1)    | 1.759(3)  |
| P(1)-C(19)   | 1.835(3)  |
| P(1)-C(13)   | 1.839(3)  |
| P(1)-C(7)    | 1.844(3)  |
| F(1)-C(2)    | 1.343(4)  |
| F(2)-C(3)    | 1.348(4)  |
| F(3)-C(4)    | 1.340(4)  |
| F(4)-C(5)    | 1.345(4)  |
| F(5)-C(6)    | 1.346(4)  |
| C(1)-C(6)    | 1.383(5)  |
| C(1)-C(2)    | 1.393(4)  |
| C(2)-C(3)    | 1.392(5)  |
| C(3)-C(4)    | 1.355(6)  |
| C(4)-C(5)    | 1.377(5)  |
| C(5)-C(6)    | 1.388(5)  |
| C(7)-C(12)   | 1.529(4)  |
| C(7)-C(8)    | 1.537(4)  |
| C(7)-H(7)    | 1.0000    |
| C(8)-C(9)    | 1.526(5)  |
| C(8)-H(8A)   | 0.9900    |
| C(8)-H(8B)   | 0.9900    |
| C(9)-C(10)   | 1.519(5)  |
| C(9)-H(9A)   | 0.9900    |
| C(9)-H(9B)   | 0.9900    |
| C(10)-C(11)  | 1.517(5)  |
| C(10)-H(10A) | 0.9900    |
| C(10)-H(10B) | 0.9900    |
| C(11)-C(12)  | 1.527(4)  |
| C(11)-H(11A) | 0.9900    |
| C(11)-H(11B) | 0.9900    |
| C(12)-H(12A) | 0.9900    |
| C(12)-H(12B) | 0.9900    |
| C(13)-C(14)  | 1.528(4)  |
| C(13)-C(18)  | 1.534(4)  |
| C(13)-H(13)  | 1.0000    |
| C(14)-C(15)  | 1.526(4)  |
| C(14)-H(14A) | 0.9900    |
| C(14)-H(14B) | 0.9900    |
| C(15)-C(16)  | 1.515(5)  |
| C(15)-H(15A) | 0.9900    |
| C(15)-H(15B) | 0.9900    |
| C(16)-C(17)  | 1.518(4)  |
| C(16)-H(16A) | 0.9900    |
| C(16)-H(16B) | 0.9900    |
| C(17)-C(18)  | 1.527(4)  |

|              |          |
|--------------|----------|
| C(17)-H(17A) | 0.9900   |
| C(17)-H(17B) | 0.9900   |
| C(18)-H(18A) | 0.9900   |
| C(18)-H(18B) | 0.9900   |
| C(19)-C(24)  | 1.400(4) |
| C(19)-C(20)  | 1.402(4) |
| C(20)-C(21)  | 1.383(4) |
| C(20)-H(20)  | 0.9500   |
| C(21)-C(22)  | 1.381(4) |
| C(21)-H(21)  | 0.9500   |
| C(22)-C(23)  | 1.386(4) |
| C(22)-H(22)  | 0.9500   |
| C(23)-C(24)  | 1.396(4) |
| C(23)-H(23)  | 0.9500   |
| C(24)-C(25)  | 1.509(4) |
| C(25)-C(26)  | 1.401(4) |
| C(25)-C(30)  | 1.404(4) |
| C(26)-C(27)  | 1.389(4) |
| C(26)-C(31)  | 1.530(4) |
| C(27)-C(28)  | 1.398(4) |
| C(27)-H(27)  | 0.9500   |
| C(28)-C(29)  | 1.384(4) |
| C(28)-C(37)  | 1.518(4) |
| C(29)-C(30)  | 1.397(4) |
| C(29)-H(29)  | 0.9500   |
| C(30)-C(34)  | 1.516(4) |
| C(31)-C(33)  | 1.522(5) |
| C(31)-C(32)  | 1.524(4) |
| C(31)-H(31)  | 1.0000   |
| C(32)-H(32A) | 0.9800   |
| C(32)-H(32B) | 0.9800   |
| C(32)-H(32C) | 0.9800   |
| C(33)-H(33A) | 0.9800   |
| C(33)-H(33B) | 0.9800   |
| C(33)-H(33C) | 0.9800   |
| C(34)-C(35)  | 1.528(4) |
| C(34)-C(36)  | 1.535(5) |
| C(34)-H(34)  | 1.0000   |
| C(35)-H(35A) | 0.9800   |
| C(35)-H(35B) | 0.9800   |
| C(35)-H(35C) | 0.9800   |
| C(36)-H(36A) | 0.9800   |
| C(36)-H(36B) | 0.9800   |
| C(36)-H(36C) | 0.9800   |
| C(37)-C(39)  | 1.487(5) |
| C(37)-C(38)  | 1.536(5) |
| C(37)-H(37)  | 1.0000   |
| C(38)-H(38A) | 0.9800   |
| C(38)-H(38B) | 0.9800   |



|                  |            |
|------------------|------------|
| C(38)-H(38C)     | 0.9800     |
| C(39)-H(39A)     | 0.9800     |
| C(39)-H(39B)     | 0.9800     |
| C(39)-H(39C)     | 0.9800     |
| P(1)-Au(1)-S(1)  | 177.62(3)  |
| C(1)-S(1)-Au(1)  | 109.03(11) |
| C(19)-P(1)-C(13) | 104.56(12) |
| C(19)-P(1)-C(7)  | 102.92(14) |
| C(13)-P(1)-C(7)  | 108.55(14) |
| C(19)-P(1)-Au(1) | 117.47(10) |
| C(13)-P(1)-Au(1) | 112.04(10) |
| C(7)-P(1)-Au(1)  | 110.58(9)  |
| C(6)-C(1)-C(2)   | 114.9(3)   |
| C(6)-C(1)-S(1)   | 127.2(2)   |
| C(2)-C(1)-S(1)   | 117.9(3)   |
| F(1)-C(2)-C(3)   | 117.4(3)   |
| F(1)-C(2)-C(1)   | 120.1(3)   |
| C(3)-C(2)-C(1)   | 122.5(3)   |
| F(2)-C(3)-C(4)   | 120.5(3)   |
| F(2)-C(3)-C(2)   | 118.9(4)   |
| C(4)-C(3)-C(2)   | 120.7(3)   |
| F(3)-C(4)-C(3)   | 120.7(4)   |
| F(3)-C(4)-C(5)   | 120.6(4)   |
| C(3)-C(4)-C(5)   | 118.7(3)   |
| F(4)-C(5)-C(4)   | 120.0(3)   |
| F(4)-C(5)-C(6)   | 119.8(3)   |
| C(4)-C(5)-C(6)   | 120.2(4)   |
| F(5)-C(6)-C(1)   | 121.4(3)   |
| F(5)-C(6)-C(5)   | 115.6(3)   |
| C(1)-C(6)-C(5)   | 122.9(3)   |
| C(12)-C(7)-C(8)  | 110.8(3)   |
| C(12)-C(7)-P(1)  | 115.18(19) |
| C(8)-C(7)-P(1)   | 112.9(2)   |
| C(12)-C(7)-H(7)  | 105.7      |
| C(8)-C(7)-H(7)   | 105.7      |
| P(1)-C(7)-H(7)   | 105.7      |
| C(9)-C(8)-C(7)   | 111.2(3)   |
| C(9)-C(8)-H(8A)  | 109.4      |
| C(7)-C(8)-H(8A)  | 109.4      |
| C(9)-C(8)-H(8B)  | 109.4      |
| C(7)-C(8)-H(8B)  | 109.4      |
| H(8A)-C(8)-H(8B) | 108.0      |
| C(10)-C(9)-C(8)  | 112.4(3)   |
| C(10)-C(9)-H(9A) | 109.1      |
| C(8)-C(9)-H(9A)  | 109.1      |
| C(10)-C(9)-H(9B) | 109.1      |
| C(8)-C(9)-H(9B)  | 109.1      |
| H(9A)-C(9)-H(9B) | 107.9      |

|                     |            |
|---------------------|------------|
| C(11)-C(10)-C(9)    | 111.2(3)   |
| C(11)-C(10)-H(10A)  | 109.4      |
| C(9)-C(10)-H(10A)   | 109.4      |
| C(11)-C(10)-H(10B)  | 109.4      |
| C(9)-C(10)-H(10B)   | 109.4      |
| H(10A)-C(10)-H(10B) | 108.0      |
| C(10)-C(11)-C(12)   | 111.2(3)   |
| C(10)-C(11)-H(11A)  | 109.4      |
| C(12)-C(11)-H(11A)  | 109.4      |
| C(10)-C(11)-H(11B)  | 109.4      |
| C(12)-C(11)-H(11B)  | 109.4      |
| H(11A)-C(11)-H(11B) | 108.0      |
| C(11)-C(12)-C(7)    | 110.7(2)   |
| C(11)-C(12)-H(12A)  | 109.5      |
| C(7)-C(12)-H(12A)   | 109.5      |
| C(11)-C(12)-H(12B)  | 109.5      |
| C(7)-C(12)-H(12B)   | 109.5      |
| H(12A)-C(12)-H(12B) | 108.1      |
| C(14)-C(13)-C(18)   | 110.2(2)   |
| C(14)-C(13)-P(1)    | 112.33(18) |
| C(18)-C(13)-P(1)    | 110.2(2)   |
| C(14)-C(13)-H(13)   | 108.0      |
| C(18)-C(13)-H(13)   | 108.0      |
| P(1)-C(13)-H(13)    | 108.0      |
| C(15)-C(14)-C(13)   | 110.3(2)   |
| C(15)-C(14)-H(14A)  | 109.6      |
| C(13)-C(14)-H(14A)  | 109.6      |
| C(15)-C(14)-H(14B)  | 109.6      |
| C(13)-C(14)-H(14B)  | 109.6      |
| H(14A)-C(14)-H(14B) | 108.1      |
| C(16)-C(15)-C(14)   | 112.2(3)   |
| C(16)-C(15)-H(15A)  | 109.2      |
| C(14)-C(15)-H(15A)  | 109.2      |
| C(16)-C(15)-H(15B)  | 109.2      |
| C(14)-C(15)-H(15B)  | 109.2      |
| H(15A)-C(15)-H(15B) | 107.9      |
| C(15)-C(16)-C(17)   | 111.3(3)   |
| C(15)-C(16)-H(16A)  | 109.4      |
| C(17)-C(16)-H(16A)  | 109.4      |
| C(15)-C(16)-H(16B)  | 109.4      |
| C(17)-C(16)-H(16B)  | 109.4      |
| H(16A)-C(16)-H(16B) | 108.0      |
| C(16)-C(17)-C(18)   | 111.5(2)   |
| C(16)-C(17)-H(17A)  | 109.3      |
| C(18)-C(17)-H(17A)  | 109.3      |
| C(16)-C(17)-H(17B)  | 109.3      |
| C(18)-C(17)-H(17B)  | 109.3      |
| H(17A)-C(17)-H(17B) | 108.0      |
| C(17)-C(18)-C(13)   | 110.6(3)   |

|                     |          |
|---------------------|----------|
| C(17)-C(18)-H(18A)  | 109.5    |
| C(13)-C(18)-H(18A)  | 109.5    |
| C(17)-C(18)-H(18B)  | 109.5    |
| C(13)-C(18)-H(18B)  | 109.5    |
| H(18A)-C(18)-H(18B) | 108.1    |
| C(24)-C(19)-C(20)   | 118.8(3) |
| C(24)-C(19)-P(1)    | 122.2(2) |
| C(20)-C(19)-P(1)    | 118.9(2) |
| C(21)-C(20)-C(19)   | 121.6(3) |
| C(21)-C(20)-H(20)   | 119.2    |
| C(19)-C(20)-H(20)   | 119.2    |
| C(22)-C(21)-C(20)   | 119.6(3) |
| C(22)-C(21)-H(21)   | 120.2    |
| C(20)-C(21)-H(21)   | 120.2    |
| C(21)-C(22)-C(23)   | 119.3(3) |
| C(21)-C(22)-H(22)   | 120.3    |
| C(23)-C(22)-H(22)   | 120.3    |
| C(22)-C(23)-C(24)   | 122.0(3) |
| C(22)-C(23)-H(23)   | 119.0    |
| C(24)-C(23)-H(23)   | 119.0    |
| C(23)-C(24)-C(19)   | 118.6(3) |
| C(23)-C(24)-C(25)   | 116.5(3) |
| C(19)-C(24)-C(25)   | 124.9(2) |
| C(26)-C(25)-C(30)   | 120.4(3) |
| C(26)-C(25)-C(24)   | 119.2(3) |
| C(30)-C(25)-C(24)   | 120.1(3) |
| C(27)-C(26)-C(25)   | 118.8(3) |
| C(27)-C(26)-C(31)   | 119.2(3) |
| C(25)-C(26)-C(31)   | 121.9(3) |
| C(26)-C(27)-C(28)   | 122.0(3) |
| C(26)-C(27)-H(27)   | 119.0    |
| C(28)-C(27)-H(27)   | 119.0    |
| C(29)-C(28)-C(27)   | 118.1(3) |
| C(29)-C(28)-C(37)   | 121.3(3) |
| C(27)-C(28)-C(37)   | 120.6(3) |
| C(28)-C(29)-C(30)   | 121.9(3) |
| C(28)-C(29)-H(29)   | 119.1    |
| C(30)-C(29)-H(29)   | 119.1    |
| C(29)-C(30)-C(25)   | 118.8(3) |
| C(29)-C(30)-C(34)   | 118.9(3) |
| C(25)-C(30)-C(34)   | 122.3(3) |
| C(33)-C(31)-C(32)   | 110.5(3) |
| C(33)-C(31)-C(26)   | 112.9(2) |
| C(32)-C(31)-C(26)   | 110.9(3) |
| C(33)-C(31)-H(31)   | 107.4    |
| C(32)-C(31)-H(31)   | 107.4    |
| C(26)-C(31)-H(31)   | 107.4    |
| C(31)-C(32)-H(32A)  | 109.5    |
| C(31)-C(32)-H(32B)  | 109.5    |

|                     |          |
|---------------------|----------|
| H(32A)-C(32)-H(32B) | 109.5    |
| C(31)-C(32)-H(32C)  | 109.5    |
| H(32A)-C(32)-H(32C) | 109.5    |
| H(32B)-C(32)-H(32C) | 109.5    |
| C(31)-C(33)-H(33A)  | 109.5    |
| C(31)-C(33)-H(33B)  | 109.5    |
| H(33A)-C(33)-H(33B) | 109.5    |
| C(31)-C(33)-H(33C)  | 109.5    |
| H(33A)-C(33)-H(33C) | 109.5    |
| H(33B)-C(33)-H(33C) | 109.5    |
| C(30)-C(34)-C(35)   | 112.6(3) |
| C(30)-C(34)-C(36)   | 110.3(3) |
| C(35)-C(34)-C(36)   | 110.0(3) |
| C(30)-C(34)-H(34)   | 107.9    |
| C(35)-C(34)-H(34)   | 107.9    |
| C(36)-C(34)-H(34)   | 107.9    |
| C(34)-C(35)-H(35A)  | 109.5    |
| C(34)-C(35)-H(35B)  | 109.5    |
| H(35A)-C(35)-H(35B) | 109.5    |
| C(34)-C(35)-H(35C)  | 109.5    |
| H(35A)-C(35)-H(35C) | 109.5    |
| H(35B)-C(35)-H(35C) | 109.5    |
| C(34)-C(36)-H(36A)  | 109.5    |
| C(34)-C(36)-H(36B)  | 109.5    |
| H(36A)-C(36)-H(36B) | 109.5    |
| C(34)-C(36)-H(36C)  | 109.5    |
| H(36A)-C(36)-H(36C) | 109.5    |
| H(36B)-C(36)-H(36C) | 109.5    |
| C(39)-C(37)-C(28)   | 113.7(3) |
| C(39)-C(37)-C(38)   | 109.1(3) |
| C(28)-C(37)-C(38)   | 109.6(3) |
| C(39)-C(37)-H(37)   | 108.1    |
| C(28)-C(37)-H(37)   | 108.1    |
| C(38)-C(37)-H(37)   | 108.1    |
| C(37)-C(38)-H(38A)  | 109.5    |
| C(37)-C(38)-H(38B)  | 109.5    |
| H(38A)-C(38)-H(38B) | 109.5    |
| C(37)-C(38)-H(38C)  | 109.5    |
| H(38A)-C(38)-H(38C) | 109.5    |
| H(38B)-C(38)-H(38C) | 109.5    |
| C(37)-C(39)-H(39A)  | 109.5    |
| C(37)-C(39)-H(39B)  | 109.5    |
| H(39A)-C(39)-H(39B) | 109.5    |
| C(37)-C(39)-H(39C)  | 109.5    |
| H(39A)-C(39)-H(39C) | 109.5    |
| H(39B)-C(39)-H(39C) | 109.5    |

---

Table S13. Anisotropic displacement parameters ( $\text{\AA}^2 \times 10^3$ ) for cldr01. The anisotropic displacement factor exponent takes the form:  $-2\pi^2 [h^2 a^{*2} U^{11} + \dots + 2 h k a^* b^* U^{12}]$

|       | $U^{11}$ | $U^{22}$ | $U^{33}$ | $U^{23}$ | $U^{13}$ | $U^{12}$ |
|-------|----------|----------|----------|----------|----------|----------|
| Au(1) | 20(1)    | 20(1)    | 14(1)    | -1(1)    | 3(1)     | -3(1)    |
| S(1)  | 30(1)    | 26(1)    | 26(1)    | -8(1)    | 7(1)     | -5(1)    |
| P(1)  | 20(1)    | 15(1)    | 12(1)    | 1(1)     | 0(1)     | -4(1)    |
| F(1)  | 54(1)    | 28(1)    | 25(1)    | -6(1)    | 4(1)     | 4(1)     |
| F(2)  | 66(2)    | 50(2)    | 35(1)    | 0(1)     | 19(1)    | 29(1)    |
| F(3)  | 39(1)    | 75(2)    | 51(1)    | 13(1)    | 26(1)    | 14(1)    |
| F(4)  | 42(1)    | 53(2)    | 44(1)    | 2(1)     | 16(1)    | -14(1)   |
| F(5)  | 44(1)    | 29(1)    | 35(1)    | -7(1)    | 18(1)    | -8(1)    |
| C(1)  | 27(2)    | 26(2)    | 15(1)    | 0(1)     | 1(1)     | 4(2)     |
| C(2)  | 39(2)    | 26(2)    | 15(1)    | 2(1)     | 0(1)     | 9(2)     |
| C(3)  | 45(2)    | 40(2)    | 19(2)    | 2(2)     | 7(1)     | 24(2)    |
| C(4)  | 33(2)    | 51(3)    | 25(2)    | 11(2)    | 14(1)    | 12(2)    |
| C(5)  | 31(2)    | 38(2)    | 24(2)    | 9(2)     | 3(1)     | -1(2)    |
| C(6)  | 30(2)    | 30(2)    | 18(2)    | 1(1)     | 3(1)     | 6(2)     |
| C(7)  | 24(2)    | 17(2)    | 19(1)    | 5(1)     | -5(1)    | -4(1)    |
| C(8)  | 34(2)    | 29(2)    | 21(2)    | 10(1)    | -2(1)    | -3(2)    |
| C(9)  | 40(2)    | 41(2)    | 28(2)    | 20(2)    | -3(2)    | -6(2)    |
| C(10) | 44(2)    | 26(2)    | 47(2)    | 20(2)    | -8(2)    | -4(2)    |
| C(11) | 41(2)    | 18(2)    | 39(2)    | 4(2)     | -5(2)    | 2(2)     |
| C(12) | 31(2)    | 18(2)    | 27(2)    | 4(1)     | -4(1)    | -1(1)    |
| C(13) | 22(2)    | 15(2)    | 13(1)    | -1(1)    | -1(1)    | -2(1)    |
| C(14) | 22(2)    | 30(2)    | 22(2)    | 10(1)    | 1(1)     | -7(2)    |
| C(15) | 22(2)    | 28(2)    | 30(2)    | 2(2)     | 0(1)     | -8(2)    |
| C(16) | 20(2)    | 30(2)    | 31(2)    | -3(2)    | 0(1)     | 0(2)     |
| C(17) | 23(2)    | 35(2)    | 23(2)    | 7(2)     | -2(1)    | 4(2)     |
| C(18) | 25(2)    | 22(2)    | 22(2)    | 5(1)     | 2(1)     | 0(1)     |
| C(19) | 21(2)    | 13(1)    | 11(1)    | 2(1)     | -2(1)    | 0(1)     |
| C(20) | 26(2)    | 16(2)    | 15(1)    | 0(1)     | -4(1)    | -1(1)    |
| C(21) | 33(2)    | 22(2)    | 12(1)    | -5(1)    | -1(1)    | 5(1)     |
| C(22) | 32(2)    | 27(2)    | 17(1)    | -1(1)    | 8(1)     | 0(2)     |
| C(23) | 23(2)    | 26(2)    | 22(2)    | -2(1)    | 6(1)     | -4(1)    |
| C(24) | 21(2)    | 14(2)    | 15(1)    | 0(1)     | 1(1)     | 0(1)     |
| C(25) | 16(1)    | 19(2)    | 16(1)    | -1(1)    | 3(1)     | -4(1)    |
| C(26) | 14(1)    | 20(2)    | 16(1)    | 2(1)     | 2(1)     | -2(1)    |
| C(27) | 20(2)    | 19(2)    | 23(2)    | -4(1)    | 4(1)     | 1(1)     |
| C(28) | 18(2)    | 26(2)    | 19(1)    | -7(1)    | 4(1)     | -2(1)    |
| C(29) | 19(2)    | 26(2)    | 16(1)    | -2(1)    | -1(1)    | 0(1)     |
| C(30) | 19(2)    | 18(2)    | 18(1)    | -1(1)    | 2(1)     | 1(1)     |
| C(31) | 25(2)    | 17(2)    | 19(1)    | -1(1)    | -4(1)    | -2(1)    |
| C(32) | 44(2)    | 39(2)    | 23(2)    | 5(2)     | 2(2)     | -8(2)    |
| C(33) | 33(2)    | 35(2)    | 33(2)    | 9(2)     | -1(1)    | 9(2)     |
| C(34) | 30(2)    | 21(2)    | 22(2)    | -4(1)    | -1(1)    | 3(2)     |
| C(35) | 46(2)    | 30(2)    | 28(2)    | 4(2)     | -6(2)    | 2(2)     |
| C(36) | 30(2)    | 40(2)    | 48(2)    | -1(2)    | 7(2)     | 12(2)    |

|       |       |       |       |        |       |        |
|-------|-------|-------|-------|--------|-------|--------|
| C(37) | 30(2) | 28(2) | 22(2) | -12(1) | -5(1) | 7(2)   |
| C(38) | 63(3) | 71(4) | 75(3) | -41(3) | 17(2) | -29(3) |
| C(39) | 98(4) | 70(4) | 28(2) | -21(2) | 15(2) | -29(3) |

---

Table S14. Torsion angles [°] for cldr01.

|                         |           |
|-------------------------|-----------|
| Au(1)-S(1)-C(1)-C(6)    | 16.7(3)   |
| Au(1)-S(1)-C(1)-C(2)    | -163.6(2) |
| C(6)-C(1)-C(2)-F(1)     | 178.6(3)  |
| S(1)-C(1)-C(2)-F(1)     | -1.1(4)   |
| C(6)-C(1)-C(2)-C(3)     | -3.6(4)   |
| S(1)-C(1)-C(2)-C(3)     | 176.7(2)  |
| F(1)-C(2)-C(3)-F(2)     | 0.5(4)    |
| C(1)-C(2)-C(3)-F(2)     | -177.3(3) |
| F(1)-C(2)-C(3)-C(4)     | -179.9(3) |
| C(1)-C(2)-C(3)-C(4)     | 2.3(5)    |
| F(2)-C(3)-C(4)-F(3)     | 0.3(5)    |
| C(2)-C(3)-C(4)-F(3)     | -179.2(3) |
| F(2)-C(3)-C(4)-C(5)     | 179.7(3)  |
| C(2)-C(3)-C(4)-C(5)     | 0.1(5)    |
| F(3)-C(4)-C(5)-F(4)     | -1.7(5)   |
| C(3)-C(4)-C(5)-F(4)     | 178.9(3)  |
| F(3)-C(4)-C(5)-C(6)     | 178.4(3)  |
| C(3)-C(4)-C(5)-C(6)     | -0.9(5)   |
| C(2)-C(1)-C(6)-F(5)     | -177.6(3) |
| S(1)-C(1)-C(6)-F(5)     | 2.1(5)    |
| C(2)-C(1)-C(6)-C(5)     | 2.8(5)    |
| S(1)-C(1)-C(6)-C(5)     | -177.5(3) |
| F(4)-C(5)-C(6)-F(5)     | -0.2(5)   |
| C(4)-C(5)-C(6)-F(5)     | 179.7(3)  |
| F(4)-C(5)-C(6)-C(1)     | 179.5(3)  |
| C(4)-C(5)-C(6)-C(1)     | -0.6(5)   |
| C(19)-P(1)-C(7)-C(12)   | -69.2(2)  |
| C(13)-P(1)-C(7)-C(12)   | 41.2(3)   |
| Au(1)-P(1)-C(7)-C(12)   | 164.5(2)  |
| C(19)-P(1)-C(7)-C(8)    | 162.1(2)  |
| C(13)-P(1)-C(7)-C(8)    | -87.4(2)  |
| Au(1)-P(1)-C(7)-C(8)    | 35.8(2)   |
| C(12)-C(7)-C(8)-C(9)    | 54.4(3)   |
| P(1)-C(7)-C(8)-C(9)     | -174.8(2) |
| C(7)-C(8)-C(9)-C(10)    | -53.5(4)  |
| C(8)-C(9)-C(10)-C(11)   | 54.2(4)   |
| C(9)-C(10)-C(11)-C(12)  | -55.9(4)  |
| C(10)-C(11)-C(12)-C(7)  | 57.3(4)   |
| C(8)-C(7)-C(12)-C(11)   | -56.4(3)  |
| P(1)-C(7)-C(12)-C(11)   | 174.0(2)  |
| C(19)-P(1)-C(13)-C(14)  | 173.9(2)  |
| C(7)-P(1)-C(13)-C(14)   | 64.6(3)   |
| Au(1)-P(1)-C(13)-C(14)  | -57.8(2)  |
| C(19)-P(1)-C(13)-C(18)  | -62.8(2)  |
| C(7)-P(1)-C(13)-C(18)   | -172.1(2) |
| Au(1)-P(1)-C(13)-C(18)  | 65.5(2)   |
| C(18)-C(13)-C(14)-C(15) | 57.1(3)   |

|                         |           |
|-------------------------|-----------|
| P(1)-C(13)-C(14)-C(15)  | -179.6(2) |
| C(13)-C(14)-C(15)-C(16) | -56.0(4)  |
| C(14)-C(15)-C(16)-C(17) | 54.5(4)   |
| C(15)-C(16)-C(17)-C(18) | -54.3(4)  |
| C(16)-C(17)-C(18)-C(13) | 56.2(4)   |
| C(14)-C(13)-C(18)-C(17) | -57.6(3)  |
| P(1)-C(13)-C(18)-C(17)  | 177.9(2)  |
| C(13)-P(1)-C(19)-C(24)  | 148.9(2)  |
| C(7)-P(1)-C(19)-C(24)   | -97.7(3)  |
| Au(1)-P(1)-C(19)-C(24)  | 24.0(3)   |
| C(13)-P(1)-C(19)-C(20)  | -34.9(3)  |
| C(7)-P(1)-C(19)-C(20)   | 78.5(2)   |
| Au(1)-P(1)-C(19)-C(20)  | -159.8(2) |
| C(24)-C(19)-C(20)-C(21) | 1.4(4)    |
| P(1)-C(19)-C(20)-C(21)  | -174.9(2) |
| C(19)-C(20)-C(21)-C(22) | 1.3(5)    |
| C(20)-C(21)-C(22)-C(23) | -2.4(5)   |
| C(21)-C(22)-C(23)-C(24) | 0.9(5)    |
| C(22)-C(23)-C(24)-C(19) | 1.8(5)    |
| C(22)-C(23)-C(24)-C(25) | -176.3(3) |
| C(20)-C(19)-C(24)-C(23) | -2.9(4)   |
| P(1)-C(19)-C(24)-C(23)  | 173.3(2)  |
| C(20)-C(19)-C(24)-C(25) | 175.0(3)  |
| P(1)-C(19)-C(24)-C(25)  | -8.8(4)   |
| C(23)-C(24)-C(25)-C(26) | 87.9(3)   |
| C(19)-C(24)-C(25)-C(26) | -90.0(4)  |
| C(23)-C(24)-C(25)-C(30) | -86.1(4)  |
| C(19)-C(24)-C(25)-C(30) | 95.9(4)   |
| C(30)-C(25)-C(26)-C(27) | -0.4(4)   |
| C(24)-C(25)-C(26)-C(27) | -174.4(3) |
| C(30)-C(25)-C(26)-C(31) | 177.4(3)  |
| C(24)-C(25)-C(26)-C(31) | 3.4(4)    |
| C(25)-C(26)-C(27)-C(28) | 0.5(4)    |
| C(31)-C(26)-C(27)-C(28) | -177.4(3) |
| C(26)-C(27)-C(28)-C(29) | -1.0(4)   |
| C(26)-C(27)-C(28)-C(37) | 177.1(3)  |
| C(27)-C(28)-C(29)-C(30) | 1.5(4)    |
| C(37)-C(28)-C(29)-C(30) | -176.6(3) |
| C(28)-C(29)-C(30)-C(25) | -1.4(5)   |
| C(28)-C(29)-C(30)-C(34) | 177.2(3)  |
| C(26)-C(25)-C(30)-C(29) | 0.8(4)    |
| C(24)-C(25)-C(30)-C(29) | 174.8(3)  |
| C(26)-C(25)-C(30)-C(34) | -177.7(3) |
| C(24)-C(25)-C(30)-C(34) | -3.7(4)   |
| C(27)-C(26)-C(31)-C(33) | -45.8(4)  |
| C(25)-C(26)-C(31)-C(33) | 136.4(3)  |
| C(27)-C(26)-C(31)-C(32) | 78.8(3)   |
| C(25)-C(26)-C(31)-C(32) | -98.9(3)  |
| C(29)-C(30)-C(34)-C(35) | 50.6(4)   |



|                         |           |
|-------------------------|-----------|
| C(25)-C(30)-C(34)-C(35) | -130.9(3) |
| C(29)-C(30)-C(34)-C(36) | -72.8(4)  |
| C(25)-C(30)-C(34)-C(36) | 105.7(3)  |
| C(29)-C(28)-C(37)-C(39) | -54.3(4)  |
| C(27)-C(28)-C(37)-C(39) | 127.6(4)  |
| C(29)-C(28)-C(37)-C(38) | 68.0(4)   |
| C(27)-C(28)-C(37)-C(38) | -110.1(4) |

---

### Compound 3

Table S15. Crystal data and structure refinement for cldr02.

|                                   |                                                       |                 |
|-----------------------------------|-------------------------------------------------------|-----------------|
| Identification code               | cldr02                                                |                 |
| Empirical formula                 | C <sub>39</sub> H <sub>50</sub> Au F <sub>4</sub> P S |                 |
| Formula weight                    | 854.78                                                |                 |
| Temperature                       | 130(2) K                                              |                 |
| Wavelength                        | 0.71073 Å                                             |                 |
| Crystal system                    | Monoclinic                                            |                 |
| Space group                       | P 2 <sub>1</sub> /n                                   |                 |
| Unit cell dimensions              | a = 11.1097(4) Å                                      | α = 90°.        |
|                                   | b = 18.1906(6) Å                                      | β = 98.494(4)°. |
|                                   | c = 18.0439(6) Å                                      | γ = 90°.        |
| Volume                            | 3606.5(2) Å <sup>3</sup>                              |                 |
| Z                                 | 4                                                     |                 |
| Density (calculated)              | 1.574 Mg/m <sup>3</sup>                               |                 |
| Absorption coefficient            | 4.229 mm <sup>-1</sup>                                |                 |
| F(000)                            | 1720                                                  |                 |
| Crystal size                      | 0.430 x 0.280 x 0.240 mm <sup>3</sup>                 |                 |
| Theta range for data collection   | 3.524 to 29.562°.                                     |                 |
| Index ranges                      | -14 ≤ h ≤ 14, -24 ≤ k ≤ 24, -24 ≤ l ≤ 25              |                 |
| Reflections collected             | 47096                                                 |                 |
| Independent reflections           | 9037 [R(int) = 0.0488]                                |                 |
| Completeness to theta = 25.242°   | 99.8 %                                                |                 |
| Absorption correction             | Analytical                                            |                 |
| Max. and min. transmission        | 0.417 and 0.254                                       |                 |
| Refinement method                 | Full-matrix least-squares on F <sup>2</sup>           |                 |
| Data / restraints / parameters    | 9037 / 0 / 421                                        |                 |
| Goodness-of-fit on F <sup>2</sup> | 1.083                                                 |                 |
| Final R indices [I > 2σ(I)]       | R1 = 0.0256, wR2 = 0.0527                             |                 |
| R indices (all data)              | R1 = 0.0339, wR2 = 0.0567                             |                 |
| Extinction coefficient            | n/a                                                   |                 |
| Largest diff. peak and hole       | 0.939 and -1.303 e.Å <sup>-3</sup>                    |                 |

Table 2. Atomic coordinates ( $\times 10^4$ ) and equivalent isotropic displacement parameters ( $\text{\AA}^2 \times 10^3$ ) for cldr02.  $U(\text{eq})$  is defined as one third of the trace of the orthogonalized  $U^{ij}$  tensor.

|       | x        | y       | z       | U(eq) |
|-------|----------|---------|---------|-------|
| Au(1) | 9535(1)  | 5972(1) | 2585(1) | 18(1) |
| S(1)  | 10232(1) | 4888(1) | 3160(1) | 27(1) |
| P(1)  | 8882(1)  | 6998(1) | 1937(1) | 16(1) |
| F(1)  | 10370(2) | 3486(1) | 3940(1) | 44(1) |
| F(2)  | 9348(2)  | 3061(1) | 5105(1) | 45(1) |
| F(3)  | 7421(2)  | 5362(1) | 5138(1) | 45(1) |
| F(4)  | 8424(2)  | 5798(1) | 3983(1) | 33(1) |
| C(1)  | 9442(2)  | 4658(1) | 3899(1) | 19(1) |
| C(2)  | 9632(3)  | 3965(1) | 4221(2) | 25(1) |
| C(3)  | 9097(3)  | 3744(2) | 4824(2) | 28(1) |
| C(4)  | 8335(3)  | 4198(2) | 5149(2) | 28(1) |
| C(5)  | 8134(3)  | 4880(2) | 4836(2) | 26(1) |
| C(6)  | 8667(2)  | 5106(1) | 4233(1) | 22(1) |
| C(7)  | 7408(2)  | 6836(1) | 1347(1) | 18(1) |
| C(8)  | 7570(2)  | 6270(2) | 742(2)  | 24(1) |
| C(9)  | 6358(3)  | 6125(2) | 244(2)  | 28(1) |
| C(10) | 5397(3)  | 5859(2) | 697(2)  | 36(1) |
| C(11) | 5229(3)  | 6415(2) | 1310(2) | 33(1) |
| C(12) | 6436(3)  | 6575(2) | 1812(2) | 28(1) |
| C(13) | 8741(2)  | 7795(1) | 2560(1) | 19(1) |
| C(14) | 8359(3)  | 7557(2) | 3309(1) | 29(1) |
| C(15) | 8377(3)  | 8215(2) | 3841(2) | 35(1) |
| C(16) | 7582(3)  | 8843(2) | 3483(2) | 37(1) |
| C(17) | 7975(3)  | 9075(2) | 2747(2) | 33(1) |
| C(18) | 7949(3)  | 8426(2) | 2207(1) | 26(1) |
| C(19) | 9858(2)  | 7345(1) | 1277(1) | 15(1) |
| C(20) | 9342(2)  | 7806(1) | 694(1)  | 20(1) |
| C(21) | 10037(3) | 8110(1) | 196(1)  | 22(1) |
| C(22) | 11275(3) | 7959(1) | 274(1)  | 23(1) |
| C(23) | 11790(2) | 7502(1) | 842(1)  | 21(1) |
| C(24) | 11104(2) | 7179(1) | 1349(1) | 15(1) |
| C(25) | 11770(2) | 6661(1) | 1912(1) | 15(1) |
| C(26) | 12422(2) | 6930(1) | 2585(1) | 16(1) |
| C(27) | 13127(2) | 6448(1) | 3063(1) | 19(1) |
| C(28) | 13225(2) | 5706(1) | 2898(1) | 17(1) |
| C(29) | 12576(2) | 5451(1) | 2234(1) | 17(1) |
| C(30) | 11844(2) | 5910(1) | 1736(1) | 16(1) |
| C(31) | 12443(3) | 7745(1) | 2782(1) | 22(1) |
| C(32) | 12114(3) | 7884(2) | 3563(2) | 29(1) |
| C(33) | 13687(3) | 8072(2) | 2707(2) | 39(1) |
| C(34) | 14064(2) | 5219(1) | 3425(1) | 22(1) |
| C(35) | 15391(3) | 5431(2) | 3413(2) | 35(1) |
| C(36) | 13875(3) | 4404(2) | 3274(2) | 34(1) |
| C(37) | 11205(2) | 5600(1) | 1001(1) | 18(1) |

|       |          |         |         |       |
|-------|----------|---------|---------|-------|
| C(38) | 10713(3) | 4823(2) | 1065(2) | 29(1) |
| C(39) | 12082(3) | 5617(2) | 425(2)  | 31(1) |

---

Table S16. Bond lengths [Å] and angles [°] for cldr02.

---

|              |           |
|--------------|-----------|
| Au(1)-P(1)   | 2.2647(6) |
| Au(1)-S(1)   | 2.3081(7) |
| S(1)-C(1)    | 1.752(3)  |
| P(1)-C(19)   | 1.837(2)  |
| P(1)-C(7)    | 1.840(3)  |
| P(1)-C(13)   | 1.855(3)  |
| F(1)-C(2)    | 1.345(3)  |
| F(2)-C(3)    | 1.355(3)  |
| F(3)-C(5)    | 1.349(3)  |
| F(4)-C(6)    | 1.351(3)  |
| C(1)-C(6)    | 1.386(4)  |
| C(1)-C(2)    | 1.392(4)  |
| C(2)-C(3)    | 1.374(4)  |
| C(3)-C(4)    | 1.375(4)  |
| C(4)-C(5)    | 1.368(4)  |
| C(4)-H(4)    | 0.9500    |
| C(5)-C(6)    | 1.376(4)  |
| C(7)-C(8)    | 1.530(4)  |
| C(7)-C(12)   | 1.538(4)  |
| C(7)-H(7)    | 1.0000    |
| C(8)-C(9)    | 1.528(4)  |
| C(8)-H(8A)   | 0.9900    |
| C(8)-H(8B)   | 0.9900    |
| C(9)-C(10)   | 1.517(4)  |
| C(9)-H(9A)   | 0.9900    |
| C(9)-H(9B)   | 0.9900    |
| C(10)-C(11)  | 1.530(4)  |
| C(10)-H(10A) | 0.9900    |
| C(10)-H(10B) | 0.9900    |
| C(11)-C(12)  | 1.531(4)  |
| C(11)-H(11A) | 0.9900    |
| C(11)-H(11B) | 0.9900    |
| C(12)-H(12A) | 0.9900    |
| C(12)-H(12B) | 0.9900    |
| C(13)-C(18)  | 1.527(4)  |
| C(13)-C(14)  | 1.537(3)  |
| C(13)-H(13)  | 1.0000    |
| C(14)-C(15)  | 1.533(4)  |
| C(14)-H(14A) | 0.9900    |
| C(14)-H(14B) | 0.9900    |
| C(15)-C(16)  | 1.527(4)  |
| C(15)-H(15A) | 0.9900    |
| C(15)-H(15B) | 0.9900    |
| C(16)-C(17)  | 1.519(4)  |
| C(16)-H(16A) | 0.9900    |
| C(16)-H(16B) | 0.9900    |
| C(17)-C(18)  | 1.528(4)  |

|              |          |
|--------------|----------|
| C(17)-H(17A) | 0.9900   |
| C(17)-H(17B) | 0.9900   |
| C(18)-H(18A) | 0.9900   |
| C(18)-H(18B) | 0.9900   |
| C(19)-C(20)  | 1.399(3) |
| C(19)-C(24)  | 1.404(3) |
| C(20)-C(21)  | 1.384(4) |
| C(20)-H(20)  | 0.9500   |
| C(21)-C(22)  | 1.390(4) |
| C(21)-H(21)  | 0.9500   |
| C(22)-C(23)  | 1.377(4) |
| C(22)-H(22)  | 0.9500   |
| C(23)-C(24)  | 1.402(3) |
| C(23)-H(23)  | 0.9500   |
| C(24)-C(25)  | 1.499(3) |
| C(25)-C(30)  | 1.407(3) |
| C(25)-C(26)  | 1.407(3) |
| C(26)-C(27)  | 1.387(3) |
| C(26)-C(31)  | 1.523(3) |
| C(27)-C(28)  | 1.389(4) |
| C(27)-H(27)  | 0.9500   |
| C(28)-C(29)  | 1.385(3) |
| C(28)-C(34)  | 1.515(3) |
| C(29)-C(30)  | 1.396(3) |
| C(29)-H(29)  | 0.9500   |
| C(30)-C(37)  | 1.518(3) |
| C(31)-C(32)  | 1.528(4) |
| C(31)-C(33)  | 1.528(4) |
| C(31)-H(31)  | 1.0000   |
| C(32)-H(32A) | 0.9800   |
| C(32)-H(32B) | 0.9800   |
| C(32)-H(32C) | 0.9800   |
| C(33)-H(33A) | 0.9800   |
| C(33)-H(33B) | 0.9800   |
| C(33)-H(33C) | 0.9800   |
| C(34)-C(36)  | 1.517(4) |
| C(34)-C(35)  | 1.527(4) |
| C(34)-H(34)  | 1.0000   |
| C(35)-H(35A) | 0.9800   |
| C(35)-H(35B) | 0.9800   |
| C(35)-H(35C) | 0.9800   |
| C(36)-H(36A) | 0.9800   |
| C(36)-H(36B) | 0.9800   |
| C(36)-H(36C) | 0.9800   |
| C(37)-C(39)  | 1.525(4) |
| C(37)-C(38)  | 1.526(4) |
| C(37)-H(37)  | 1.0000   |
| C(38)-H(38A) | 0.9800   |
| C(38)-H(38B) | 0.9800   |

|                  |            |
|------------------|------------|
| C(38)-H(38C)     | 0.9800     |
| C(39)-H(39A)     | 0.9800     |
| C(39)-H(39B)     | 0.9800     |
| C(39)-H(39C)     | 0.9800     |
| P(1)-Au(1)-S(1)  | 175.62(2)  |
| C(1)-S(1)-Au(1)  | 111.94(9)  |
| C(19)-P(1)-C(7)  | 103.90(11) |
| C(19)-P(1)-C(13) | 103.62(11) |
| C(7)-P(1)-C(13)  | 109.16(12) |
| C(19)-P(1)-Au(1) | 116.31(8)  |
| C(7)-P(1)-Au(1)  | 110.88(8)  |
| C(13)-P(1)-Au(1) | 112.33(8)  |
| C(6)-C(1)-C(2)   | 114.6(2)   |
| C(6)-C(1)-S(1)   | 127.2(2)   |
| C(2)-C(1)-S(1)   | 118.1(2)   |
| F(1)-C(2)-C(3)   | 117.9(2)   |
| F(1)-C(2)-C(1)   | 119.5(2)   |
| C(3)-C(2)-C(1)   | 122.5(3)   |
| F(2)-C(3)-C(2)   | 118.4(3)   |
| F(2)-C(3)-C(4)   | 119.7(2)   |
| C(2)-C(3)-C(4)   | 121.9(3)   |
| C(5)-C(4)-C(3)   | 116.2(2)   |
| C(5)-C(4)-H(4)   | 121.9      |
| C(3)-C(4)-H(4)   | 121.9      |
| F(3)-C(5)-C(4)   | 119.6(2)   |
| F(3)-C(5)-C(6)   | 118.1(2)   |
| C(4)-C(5)-C(6)   | 122.3(3)   |
| F(4)-C(6)-C(5)   | 117.1(2)   |
| F(4)-C(6)-C(1)   | 120.5(2)   |
| C(5)-C(6)-C(1)   | 122.4(2)   |
| C(8)-C(7)-C(12)  | 110.4(2)   |
| C(8)-C(7)-P(1)   | 109.39(17) |
| C(12)-C(7)-P(1)  | 111.74(17) |
| C(8)-C(7)-H(7)   | 108.4      |
| C(12)-C(7)-H(7)  | 108.4      |
| P(1)-C(7)-H(7)   | 108.4      |
| C(9)-C(8)-C(7)   | 110.5(2)   |
| C(9)-C(8)-H(8A)  | 109.6      |
| C(7)-C(8)-H(8A)  | 109.6      |
| C(9)-C(8)-H(8B)  | 109.6      |
| C(7)-C(8)-H(8B)  | 109.6      |
| H(8A)-C(8)-H(8B) | 108.1      |
| C(10)-C(9)-C(8)  | 111.6(2)   |
| C(10)-C(9)-H(9A) | 109.3      |
| C(8)-C(9)-H(9A)  | 109.3      |
| C(10)-C(9)-H(9B) | 109.3      |
| C(8)-C(9)-H(9B)  | 109.3      |
| H(9A)-C(9)-H(9B) | 108.0      |

|                     |            |
|---------------------|------------|
| C(9)-C(10)-C(11)    | 110.5(2)   |
| C(9)-C(10)-H(10A)   | 109.6      |
| C(11)-C(10)-H(10A)  | 109.6      |
| C(9)-C(10)-H(10B)   | 109.6      |
| C(11)-C(10)-H(10B)  | 109.6      |
| H(10A)-C(10)-H(10B) | 108.1      |
| C(10)-C(11)-C(12)   | 111.3(3)   |
| C(10)-C(11)-H(11A)  | 109.4      |
| C(12)-C(11)-H(11A)  | 109.4      |
| C(10)-C(11)-H(11B)  | 109.4      |
| C(12)-C(11)-H(11B)  | 109.4      |
| H(11A)-C(11)-H(11B) | 108.0      |
| C(11)-C(12)-C(7)    | 111.1(2)   |
| C(11)-C(12)-H(12A)  | 109.4      |
| C(7)-C(12)-H(12A)   | 109.4      |
| C(11)-C(12)-H(12B)  | 109.4      |
| C(7)-C(12)-H(12B)   | 109.4      |
| H(12A)-C(12)-H(12B) | 108.0      |
| C(18)-C(13)-C(14)   | 111.2(2)   |
| C(18)-C(13)-P(1)    | 115.41(17) |
| C(14)-C(13)-P(1)    | 111.85(18) |
| C(18)-C(13)-H(13)   | 105.9      |
| C(14)-C(13)-H(13)   | 105.9      |
| P(1)-C(13)-H(13)    | 105.9      |
| C(15)-C(14)-C(13)   | 110.6(2)   |
| C(15)-C(14)-H(14A)  | 109.5      |
| C(13)-C(14)-H(14A)  | 109.5      |
| C(15)-C(14)-H(14B)  | 109.5      |
| C(13)-C(14)-H(14B)  | 109.5      |
| H(14A)-C(14)-H(14B) | 108.1      |
| C(16)-C(15)-C(14)   | 111.5(2)   |
| C(16)-C(15)-H(15A)  | 109.3      |
| C(14)-C(15)-H(15A)  | 109.3      |
| C(16)-C(15)-H(15B)  | 109.3      |
| C(14)-C(15)-H(15B)  | 109.3      |
| H(15A)-C(15)-H(15B) | 108.0      |
| C(17)-C(16)-C(15)   | 110.7(3)   |
| C(17)-C(16)-H(16A)  | 109.5      |
| C(15)-C(16)-H(16A)  | 109.5      |
| C(17)-C(16)-H(16B)  | 109.5      |
| C(15)-C(16)-H(16B)  | 109.5      |
| H(16A)-C(16)-H(16B) | 108.1      |
| C(16)-C(17)-C(18)   | 111.3(2)   |
| C(16)-C(17)-H(17A)  | 109.4      |
| C(18)-C(17)-H(17A)  | 109.4      |
| C(16)-C(17)-H(17B)  | 109.4      |
| C(18)-C(17)-H(17B)  | 109.4      |
| H(17A)-C(17)-H(17B) | 108.0      |
| C(13)-C(18)-C(17)   | 111.0(2)   |



|                     |            |
|---------------------|------------|
| C(13)-C(18)-H(18A)  | 109.4      |
| C(17)-C(18)-H(18A)  | 109.4      |
| C(13)-C(18)-H(18B)  | 109.4      |
| C(17)-C(18)-H(18B)  | 109.4      |
| H(18A)-C(18)-H(18B) | 108.0      |
| C(20)-C(19)-C(24)   | 119.2(2)   |
| C(20)-C(19)-P(1)    | 118.49(19) |
| C(24)-C(19)-P(1)    | 122.32(18) |
| C(21)-C(20)-C(19)   | 121.4(2)   |
| C(21)-C(20)-H(20)   | 119.3      |
| C(19)-C(20)-H(20)   | 119.3      |
| C(20)-C(21)-C(22)   | 119.7(2)   |
| C(20)-C(21)-H(21)   | 120.2      |
| C(22)-C(21)-H(21)   | 120.2      |
| C(23)-C(22)-C(21)   | 119.3(2)   |
| C(23)-C(22)-H(22)   | 120.3      |
| C(21)-C(22)-H(22)   | 120.3      |
| C(22)-C(23)-C(24)   | 122.2(2)   |
| C(22)-C(23)-H(23)   | 118.9      |
| C(24)-C(23)-H(23)   | 118.9      |
| C(23)-C(24)-C(19)   | 118.2(2)   |
| C(23)-C(24)-C(25)   | 116.4(2)   |
| C(19)-C(24)-C(25)   | 125.4(2)   |
| C(30)-C(25)-C(26)   | 119.5(2)   |
| C(30)-C(25)-C(24)   | 119.8(2)   |
| C(26)-C(25)-C(24)   | 120.4(2)   |
| C(27)-C(26)-C(25)   | 119.1(2)   |
| C(27)-C(26)-C(31)   | 118.9(2)   |
| C(25)-C(26)-C(31)   | 121.9(2)   |
| C(26)-C(27)-C(28)   | 122.4(2)   |
| C(26)-C(27)-H(27)   | 118.8      |
| C(28)-C(27)-H(27)   | 118.8      |
| C(29)-C(28)-C(27)   | 117.5(2)   |
| C(29)-C(28)-C(34)   | 122.7(2)   |
| C(27)-C(28)-C(34)   | 119.7(2)   |
| C(28)-C(29)-C(30)   | 122.4(2)   |
| C(28)-C(29)-H(29)   | 118.8      |
| C(30)-C(29)-H(29)   | 118.8      |
| C(29)-C(30)-C(25)   | 118.9(2)   |
| C(29)-C(30)-C(37)   | 119.5(2)   |
| C(25)-C(30)-C(37)   | 121.5(2)   |
| C(26)-C(31)-C(32)   | 112.2(2)   |
| C(26)-C(31)-C(33)   | 110.0(2)   |
| C(32)-C(31)-C(33)   | 111.1(2)   |
| C(26)-C(31)-H(31)   | 107.8      |
| C(32)-C(31)-H(31)   | 107.8      |
| C(33)-C(31)-H(31)   | 107.8      |
| C(31)-C(32)-H(32A)  | 109.5      |
| C(31)-C(32)-H(32B)  | 109.5      |

|                     |          |
|---------------------|----------|
| H(32A)-C(32)-H(32B) | 109.5    |
| C(31)-C(32)-H(32C)  | 109.5    |
| H(32A)-C(32)-H(32C) | 109.5    |
| H(32B)-C(32)-H(32C) | 109.5    |
| C(31)-C(33)-H(33A)  | 109.5    |
| C(31)-C(33)-H(33B)  | 109.5    |
| H(33A)-C(33)-H(33B) | 109.5    |
| C(31)-C(33)-H(33C)  | 109.5    |
| H(33A)-C(33)-H(33C) | 109.5    |
| H(33B)-C(33)-H(33C) | 109.5    |
| C(28)-C(34)-C(36)   | 113.8(2) |
| C(28)-C(34)-C(35)   | 110.4(2) |
| C(36)-C(34)-C(35)   | 110.7(2) |
| C(28)-C(34)-H(34)   | 107.2    |
| C(36)-C(34)-H(34)   | 107.2    |
| C(35)-C(34)-H(34)   | 107.2    |
| C(34)-C(35)-H(35A)  | 109.5    |
| C(34)-C(35)-H(35B)  | 109.5    |
| H(35A)-C(35)-H(35B) | 109.5    |
| C(34)-C(35)-H(35C)  | 109.5    |
| H(35A)-C(35)-H(35C) | 109.5    |
| H(35B)-C(35)-H(35C) | 109.5    |
| C(34)-C(36)-H(36A)  | 109.5    |
| C(34)-C(36)-H(36B)  | 109.5    |
| H(36A)-C(36)-H(36B) | 109.5    |
| C(34)-C(36)-H(36C)  | 109.5    |
| H(36A)-C(36)-H(36C) | 109.5    |
| H(36B)-C(36)-H(36C) | 109.5    |
| C(30)-C(37)-C(39)   | 109.0(2) |
| C(30)-C(37)-C(38)   | 113.8(2) |
| C(39)-C(37)-C(38)   | 110.0(2) |
| C(30)-C(37)-H(37)   | 108.0    |
| C(39)-C(37)-H(37)   | 108.0    |
| C(38)-C(37)-H(37)   | 108.0    |
| C(37)-C(38)-H(38A)  | 109.5    |
| C(37)-C(38)-H(38B)  | 109.5    |
| H(38A)-C(38)-H(38B) | 109.5    |
| C(37)-C(38)-H(38C)  | 109.5    |
| H(38A)-C(38)-H(38C) | 109.5    |
| H(38B)-C(38)-H(38C) | 109.5    |
| C(37)-C(39)-H(39A)  | 109.5    |
| C(37)-C(39)-H(39B)  | 109.5    |
| H(39A)-C(39)-H(39B) | 109.5    |
| C(37)-C(39)-H(39C)  | 109.5    |
| H(39A)-C(39)-H(39C) | 109.5    |
| H(39B)-C(39)-H(39C) | 109.5    |

---

Table S17. Anisotropic displacement parameters ( $\text{\AA}^2 \times 10^3$ ) for cldr02. The anisotropic displacement factor exponent takes the form:  $-2\pi^2 [h^2 a^{*2} U^{11} + \dots + 2 h k a^* b^* U^{12}]$

|       | $U^{11}$ | $U^{22}$ | $U^{33}$ | $U^{23}$ | $U^{13}$ | $U^{12}$ |
|-------|----------|----------|----------|----------|----------|----------|
| Au(1) | 17(1)    | 20(1)    | 16(1)    | 6(1)     | 4(1)     | 1(1)     |
| S(1)  | 32(1)    | 27(1)    | 25(1)    | 11(1)    | 14(1)    | 11(1)    |
| P(1)  | 14(1)    | 19(1)    | 15(1)    | 4(1)     | 3(1)     | 1(1)     |
| F(1)  | 75(2)    | 26(1)    | 38(1)    | 9(1)     | 25(1)    | 19(1)    |
| F(2)  | 80(2)    | 22(1)    | 36(1)    | 12(1)    | 17(1)    | -2(1)    |
| F(3)  | 50(1)    | 51(1)    | 39(1)    | 12(1)    | 28(1)    | 18(1)    |
| F(4)  | 39(1)    | 29(1)    | 34(1)    | 13(1)    | 16(1)    | 14(1)    |
| C(1)  | 20(1)    | 23(1)    | 15(1)    | 3(1)     | 2(1)     | -2(1)    |
| C(2)  | 36(2)    | 20(1)    | 20(1)    | 0(1)     | 5(1)     | 1(1)     |
| C(3)  | 41(2)    | 18(1)    | 23(1)    | 5(1)     | -1(1)    | -7(1)    |
| C(4)  | 30(2)    | 34(2)    | 22(1)    | 5(1)     | 7(1)     | -10(1)   |
| C(5)  | 23(2)    | 33(2)    | 24(1)    | 3(1)     | 7(1)     | 2(1)     |
| C(6)  | 20(1)    | 24(1)    | 20(1)    | 6(1)     | 2(1)     | -1(1)    |
| C(7)  | 14(1)    | 22(1)    | 19(1)    | 4(1)     | 2(1)     | 1(1)     |
| C(8)  | 17(1)    | 24(1)    | 28(1)    | -3(1)    | 1(1)     | 1(1)     |
| C(9)  | 21(2)    | 33(2)    | 31(2)    | -9(1)    | -1(1)    | -4(1)    |
| C(10) | 24(2)    | 35(2)    | 48(2)    | -2(2)    | -1(1)    | -11(1)   |
| C(11) | 15(1)    | 46(2)    | 38(2)    | 3(2)     | 4(1)     | -8(1)    |
| C(12) | 20(2)    | 40(2)    | 26(1)    | 3(1)     | 6(1)     | -5(1)    |
| C(13) | 16(1)    | 25(1)    | 17(1)    | 0(1)     | 4(1)     | 1(1)     |
| C(14) | 39(2)    | 31(2)    | 18(1)    | 2(1)     | 7(1)     | 1(1)     |
| C(15) | 47(2)    | 39(2)    | 20(1)    | -2(1)    | 11(1)    | 1(2)     |
| C(16) | 43(2)    | 38(2)    | 34(2)    | -9(1)    | 16(2)    | 6(2)     |
| C(17) | 41(2)    | 27(2)    | 32(2)    | 1(1)     | 9(1)     | 9(1)     |
| C(18) | 32(2)    | 26(1)    | 19(1)    | 0(1)     | 4(1)     | 6(1)     |
| C(19) | 17(1)    | 15(1)    | 12(1)    | 0(1)     | 3(1)     | -2(1)    |
| C(20) | 18(1)    | 21(1)    | 18(1)    | 3(1)     | 0(1)     | 2(1)     |
| C(21) | 30(2)    | 21(1)    | 15(1)    | 7(1)     | -1(1)    | 1(1)     |
| C(22) | 30(2)    | 24(1)    | 19(1)    | 6(1)     | 9(1)     | -2(1)    |
| C(23) | 16(1)    | 22(1)    | 25(1)    | 3(1)     | 7(1)     | 0(1)     |
| C(24) | 18(1)    | 14(1)    | 14(1)    | 0(1)     | 3(1)     | -1(1)    |
| C(25) | 12(1)    | 17(1)    | 16(1)    | 3(1)     | 4(1)     | 2(1)     |
| C(26) | 19(1)    | 15(1)    | 17(1)    | 1(1)     | 7(1)     | 0(1)     |
| C(27) | 18(1)    | 22(1)    | 14(1)    | -1(1)    | -1(1)    | -4(1)    |
| C(28) | 14(1)    | 21(1)    | 17(1)    | 5(1)     | 5(1)     | 0(1)     |
| C(29) | 15(1)    | 16(1)    | 21(1)    | 0(1)     | 4(1)     | -1(1)    |
| C(30) | 13(1)    | 19(1)    | 16(1)    | -1(1)    | 5(1)     | -1(1)    |
| C(31) | 31(2)    | 16(1)    | 19(1)    | -3(1)    | 1(1)     | -1(1)    |
| C(32) | 38(2)    | 27(2)    | 23(1)    | -6(1)    | 5(1)     | 2(1)     |
| C(33) | 51(2)    | 25(2)    | 43(2)    | -9(1)    | 18(2)    | -16(1)   |
| C(34) | 19(1)    | 24(1)    | 22(1)    | 6(1)     | 0(1)     | 4(1)     |
| C(35) | 21(2)    | 40(2)    | 42(2)    | 6(2)     | -5(1)    | 2(1)     |
| C(36) | 33(2)    | 26(2)    | 41(2)    | 13(1)    | -2(1)    | 6(1)     |
| C(37) | 18(1)    | 18(1)    | 17(1)    | 0(1)     | 0(1)     | 1(1)     |

|       |       |       |       |       |       |        |
|-------|-------|-------|-------|-------|-------|--------|
| C(38) | 34(2) | 29(2) | 23(1) | -1(1) | -3(1) | -11(1) |
| C(39) | 32(2) | 39(2) | 24(1) | -9(1) | 10(1) | -9(1)  |

---

Table S18. Torsion angles [°] for cldr02.

|                         |             |
|-------------------------|-------------|
| Au(1)-S(1)-C(1)-C(6)    | -12.9(3)    |
| Au(1)-S(1)-C(1)-C(2)    | 170.16(19)  |
| C(6)-C(1)-C(2)-F(1)     | -179.9(2)   |
| S(1)-C(1)-C(2)-F(1)     | -2.6(4)     |
| C(6)-C(1)-C(2)-C(3)     | -0.3(4)     |
| S(1)-C(1)-C(2)-C(3)     | 177.1(2)    |
| F(1)-C(2)-C(3)-F(2)     | 0.5(4)      |
| C(1)-C(2)-C(3)-F(2)     | -179.2(3)   |
| F(1)-C(2)-C(3)-C(4)     | 179.6(3)    |
| C(1)-C(2)-C(3)-C(4)     | 0.0(5)      |
| F(2)-C(3)-C(4)-C(5)     | 179.6(3)    |
| C(2)-C(3)-C(4)-C(5)     | 0.4(4)      |
| C(3)-C(4)-C(5)-F(3)     | -178.3(3)   |
| C(3)-C(4)-C(5)-C(6)     | -0.4(4)     |
| F(3)-C(5)-C(6)-F(4)     | -0.5(4)     |
| C(4)-C(5)-C(6)-F(4)     | -178.4(3)   |
| F(3)-C(5)-C(6)-C(1)     | 178.1(2)    |
| C(4)-C(5)-C(6)-C(1)     | 0.2(4)      |
| C(2)-C(1)-C(6)-F(4)     | 178.8(2)    |
| S(1)-C(1)-C(6)-F(4)     | 1.7(4)      |
| C(2)-C(1)-C(6)-C(5)     | 0.2(4)      |
| S(1)-C(1)-C(6)-C(5)     | -176.8(2)   |
| C(19)-P(1)-C(7)-C(8)    | 60.26(19)   |
| C(13)-P(1)-C(7)-C(8)    | 170.31(17)  |
| Au(1)-P(1)-C(7)-C(8)    | -65.42(18)  |
| C(19)-P(1)-C(7)-C(12)   | -177.23(19) |
| C(13)-P(1)-C(7)-C(12)   | -67.2(2)    |
| Au(1)-P(1)-C(7)-C(12)   | 57.1(2)     |
| C(12)-C(7)-C(8)-C(9)    | 56.6(3)     |
| P(1)-C(7)-C(8)-C(9)     | 179.92(19)  |
| C(7)-C(8)-C(9)-C(10)    | -57.7(3)    |
| C(8)-C(9)-C(10)-C(11)   | 56.7(3)     |
| C(9)-C(10)-C(11)-C(12)  | -55.6(3)    |
| C(10)-C(11)-C(12)-C(7)  | 55.6(3)     |
| C(8)-C(7)-C(12)-C(11)   | -55.9(3)    |
| P(1)-C(7)-C(12)-C(11)   | -177.9(2)   |
| C(19)-P(1)-C(13)-C(18)  | 72.0(2)     |
| C(7)-P(1)-C(13)-C(18)   | -38.2(2)    |
| Au(1)-P(1)-C(13)-C(18)  | -161.62(17) |
| C(19)-P(1)-C(13)-C(14)  | -159.50(19) |
| C(7)-P(1)-C(13)-C(14)   | 90.3(2)     |
| Au(1)-P(1)-C(13)-C(14)  | -33.2(2)    |
| C(18)-C(13)-C(14)-C(15) | -55.1(3)    |
| P(1)-C(13)-C(14)-C(15)  | 174.2(2)    |
| C(13)-C(14)-C(15)-C(16) | 55.5(3)     |
| C(14)-C(15)-C(16)-C(17) | -56.3(4)    |
| C(15)-C(16)-C(17)-C(18) | 56.5(4)     |

|                         |             |
|-------------------------|-------------|
| C(14)-C(13)-C(18)-C(17) | 55.7(3)     |
| P(1)-C(13)-C(18)-C(17)  | -175.6(2)   |
| C(16)-C(17)-C(18)-C(13) | -56.4(3)    |
| C(7)-P(1)-C(19)-C(20)   | 36.7(2)     |
| C(13)-P(1)-C(19)-C(20)  | -77.4(2)    |
| Au(1)-P(1)-C(19)-C(20)  | 158.81(16)  |
| C(7)-P(1)-C(19)-C(24)   | -144.9(2)   |
| C(13)-P(1)-C(19)-C(24)  | 101.0(2)    |
| Au(1)-P(1)-C(19)-C(24)  | -22.7(2)    |
| C(24)-C(19)-C(20)-C(21) | -1.1(4)     |
| P(1)-C(19)-C(20)-C(21)  | 177.39(19)  |
| C(19)-C(20)-C(21)-C(22) | -0.3(4)     |
| C(20)-C(21)-C(22)-C(23) | 0.7(4)      |
| C(21)-C(22)-C(23)-C(24) | 0.2(4)      |
| C(22)-C(23)-C(24)-C(19) | -1.5(4)     |
| C(22)-C(23)-C(24)-C(25) | 176.7(2)    |
| C(20)-C(19)-C(24)-C(23) | 2.0(3)      |
| P(1)-C(19)-C(24)-C(23)  | -176.49(18) |
| C(20)-C(19)-C(24)-C(25) | -176.1(2)   |
| P(1)-C(19)-C(24)-C(25)  | 5.5(3)      |
| C(23)-C(24)-C(25)-C(30) | -88.9(3)    |
| C(19)-C(24)-C(25)-C(30) | 89.2(3)     |
| C(23)-C(24)-C(25)-C(26) | 84.9(3)     |
| C(19)-C(24)-C(25)-C(26) | -97.0(3)    |
| C(30)-C(25)-C(26)-C(27) | 0.1(3)      |
| C(24)-C(25)-C(26)-C(27) | -173.7(2)   |
| C(30)-C(25)-C(26)-C(31) | 176.0(2)    |
| C(24)-C(25)-C(26)-C(31) | 2.2(4)      |
| C(25)-C(26)-C(27)-C(28) | 0.7(4)      |
| C(31)-C(26)-C(27)-C(28) | -175.4(2)   |
| C(26)-C(27)-C(28)-C(29) | -0.7(4)     |
| C(26)-C(27)-C(28)-C(34) | 176.7(2)    |
| C(27)-C(28)-C(29)-C(30) | 0.1(4)      |
| C(34)-C(28)-C(29)-C(30) | -177.3(2)   |
| C(28)-C(29)-C(30)-C(25) | 0.6(4)      |
| C(28)-C(29)-C(30)-C(37) | 177.1(2)    |
| C(26)-C(25)-C(30)-C(29) | -0.7(3)     |
| C(24)-C(25)-C(30)-C(29) | 173.2(2)    |
| C(26)-C(25)-C(30)-C(37) | -177.1(2)   |
| C(24)-C(25)-C(30)-C(37) | -3.3(3)     |
| C(27)-C(26)-C(31)-C(32) | -55.4(3)    |
| C(25)-C(26)-C(31)-C(32) | 128.7(3)    |
| C(27)-C(26)-C(31)-C(33) | 68.8(3)     |
| C(25)-C(26)-C(31)-C(33) | -107.2(3)   |
| C(29)-C(28)-C(34)-C(36) | -15.6(4)    |
| C(27)-C(28)-C(34)-C(36) | 167.1(2)    |
| C(29)-C(28)-C(34)-C(35) | 109.6(3)    |
| C(27)-C(28)-C(34)-C(35) | -67.7(3)    |
| C(29)-C(30)-C(37)-C(39) | -84.4(3)    |

|                         |           |
|-------------------------|-----------|
| C(25)-C(30)-C(37)-C(39) | 92.0(3)   |
| C(29)-C(30)-C(37)-C(38) | 38.8(3)   |
| C(25)-C(30)-C(37)-C(38) | -144.8(2) |

---

## Compound 4

Table S19. Crystal data and structure refinement for cldr09.

|                                   |                                             |                              |
|-----------------------------------|---------------------------------------------|------------------------------|
| Identification code               | cldr09                                      |                              |
| Empirical formula                 | C41 H52 Au F6 P S                           |                              |
| Formula weight                    | 918.82                                      |                              |
| Temperature                       | 130(2) K                                    |                              |
| Wavelength                        | 0.71073 Å                                   |                              |
| Crystal system                    | Monoclinic                                  |                              |
| Space group                       | P 21/n                                      |                              |
| Unit cell dimensions              | a = 12.5649(5) Å                            | $\alpha = 90^\circ$ .        |
|                                   | b = 15.7464(8) Å                            | $\beta = 107.425(5)^\circ$ . |
|                                   | c = 20.5938(9) Å                            | $\gamma = 90^\circ$ .        |
| Volume                            | 3887.5(3) Å <sup>3</sup>                    |                              |
| Z                                 | 4                                           |                              |
| Density (calculated)              | 1.570 Mg/m <sup>3</sup>                     |                              |
| Absorption coefficient            | 3.936 mm <sup>-1</sup>                      |                              |
| F(000)                            | 1848                                        |                              |
| Crystal size                      | 0.450 x 0.340 x 0.120 mm <sup>3</sup>       |                              |
| Theta range for data collection   | 3.423 to 29.427°.                           |                              |
| Index ranges                      | -17<=h<=12, -16<=k<=20, -28<=l<=28          |                              |
| Reflections collected             | 20486                                       |                              |
| Independent reflections           | 9204 [R(int) = 0.0371]                      |                              |
| Completeness to theta = 25.242°   | 99.7 %                                      |                              |
| Absorption correction             | Analytical                                  |                              |
| Max. and min. transmission        | 0.627 and 0.273                             |                              |
| Refinement method                 | Full-matrix least-squares on F <sup>2</sup> |                              |
| Data / restraints / parameters    | 9204 / 0 / 455                              |                              |
| Goodness-of-fit on F <sup>2</sup> | 1.032                                       |                              |
| Final R indices [I>2sigma(I)]     | R1 = 0.0368, wR2 = 0.0720                   |                              |
| R indices (all data)              | R1 = 0.0548, wR2 = 0.0801                   |                              |
| Extinction coefficient            | n/a                                         |                              |
| Largest diff. peak and hole       | 1.763 and -1.089 e.Å <sup>-3</sup>          |                              |



Table S20. Atomic coordinates ( $\times 10^4$ ) and equivalent isotropic displacement parameters ( $\text{\AA}^2 \times 10^3$ ) for cldr09. U(eq) is defined as one third of the trace of the orthogonalized  $U^{ij}$  tensor.

|       | x        | y       | z       | U(eq) |
|-------|----------|---------|---------|-------|
| Au(1) | 2364(1)  | 1598(1) | 4560(1) | 20(1) |
| S(1)  | 1999(1)  | 1315(1) | 5570(1) | 29(1) |
| P(1)  | 2897(1)  | 1774(1) | 3613(1) | 18(1) |
| F(4)  | 2574(3)  | 5237(2) | 6154(2) | 61(1) |
| F(5)  | 2774(2)  | 4581(2) | 5285(2) | 52(1) |
| F(6)  | 1167(3)  | 4988(2) | 5300(2) | 57(1) |
| C(1)  | 1863(3)  | 2281(3) | 5928(2) | 27(1) |
| C(2)  | 1549(4)  | 2288(3) | 6531(2) | 32(1) |
| C(3)  | 1432(4)  | 3050(3) | 6838(2) | 33(1) |
| C(4)  | 1619(4)  | 3825(3) | 6584(2) | 34(1) |
| C(5)  | 1934(3)  | 3827(3) | 5992(2) | 27(1) |
| C(6)  | 2051(3)  | 3076(3) | 5669(2) | 26(1) |
| C(7)  | 3828(3)  | 2709(3) | 3670(2) | 20(1) |
| C(8)  | 4361(4)  | 2967(3) | 4407(2) | 34(1) |
| C(9)  | 5170(4)  | 3712(3) | 4471(3) | 44(1) |
| C(10) | 4578(4)  | 4472(3) | 4070(3) | 41(1) |
| C(11) | 4059(5)  | 4212(4) | 3332(3) | 51(2) |
| C(12) | 3257(4)  | 3466(3) | 3261(3) | 44(1) |
| C(13) | 3747(3)  | 864(3)  | 3511(2) | 20(1) |
| C(14) | 4784(3)  | 768(3)  | 4130(2) | 28(1) |
| C(15) | 5481(3)  | 0(3)    | 4052(2) | 33(1) |
| C(16) | 4810(4)  | -810(3) | 3916(2) | 35(1) |
| C(17) | 3769(4)  | -713(3) | 3312(2) | 32(1) |
| C(18) | 3074(3)  | 42(3)   | 3402(2) | 29(1) |
| C(19) | 1812(3)  | 1835(3) | 2791(2) | 20(1) |
| C(20) | 2159(3)  | 1788(3) | 2205(2) | 24(1) |
| C(21) | 1400(4)  | 1803(3) | 1559(2) | 30(1) |
| C(22) | 273(4)   | 1860(3) | 1489(2) | 29(1) |
| C(23) | -84(3)   | 1910(3) | 2058(2) | 25(1) |
| C(24) | 669(3)   | 1901(3) | 2720(2) | 19(1) |
| C(25) | 177(3)   | 1967(3) | 3299(2) | 18(1) |
| C(26) | -115(3)  | 1223(3) | 3588(2) | 21(1) |
| C(27) | -591(3)  | 1312(3) | 4112(2) | 26(1) |
| C(28) | -794(3)  | 2090(3) | 4364(2) | 24(1) |
| C(29) | -529(3)  | 2808(3) | 4056(2) | 24(1) |
| C(30) | -54(3)   | 2766(3) | 3526(2) | 20(1) |
| C(31) | 38(3)    | 356(3)  | 3319(2) | 27(1) |
| C(32) | -1054(4) | 46(3)   | 2824(3) | 42(1) |
| C(33) | 490(4)   | -307(3) | 3879(2) | 32(1) |
| C(34) | -1268(4) | 2120(3) | 4961(2) | 33(1) |
| C(35) | -2437(4) | 1750(4) | 4762(3) | 52(2) |
| C(36) | -1250(4) | 2994(4) | 5279(3) | 43(1) |
| C(37) | 138(3)   | 3578(3) | 3180(2) | 24(1) |
| C(38) | -967(4)  | 3899(3) | 2693(2) | 34(1) |

|       |         |         |         |       |
|-------|---------|---------|---------|-------|
| C(39) | 679(4)  | 4284(3) | 3678(2) | 37(1) |
| C(40) | 1044(5) | 3020(4) | 7445(3) | 47(1) |
| C(41) | 2126(4) | 4646(3) | 5690(2) | 36(1) |
| F(1)  | 1003(8) | 3730(6) | 7760(4) | 78(1) |
| F(2)  | 21(7)   | 2661(7) | 7329(4) | 78(1) |
| F(3)  | 1702(7) | 2482(7) | 7933(4) | 78(1) |
| F(1A) | 1651(9) | 3598(7) | 7933(5) | 78(1) |
| F(2A) | 32(8)   | 3301(8) | 7344(4) | 78(1) |
| F(3A) | 1202(9) | 2295(8) | 7803(5) | 78(1) |

---

Table S21. Bond lengths [Å] and angles [°] for cldr09.

---

|              |            |
|--------------|------------|
| Au(1)-P(1)   | 2.2586(10) |
| Au(1)-S(1)   | 2.3055(11) |
| S(1)-C(1)    | 1.720(5)   |
| P(1)-C(19)   | 1.831(4)   |
| P(1)-C(13)   | 1.837(4)   |
| P(1)-C(7)    | 1.863(4)   |
| F(4)-C(41)   | 1.332(6)   |
| F(5)-C(41)   | 1.333(5)   |
| F(6)-C(41)   | 1.345(5)   |
| C(1)-C(6)    | 1.409(6)   |
| C(1)-C(2)    | 1.411(6)   |
| C(2)-C(3)    | 1.385(7)   |
| C(2)-H(2)    | 0.9500     |
| C(3)-C(4)    | 1.376(7)   |
| C(3)-C(40)   | 1.471(7)   |
| C(4)-C(5)    | 1.390(6)   |
| C(4)-H(4)    | 0.9500     |
| C(5)-C(6)    | 1.385(6)   |
| C(5)-C(41)   | 1.482(7)   |
| C(6)-H(6)    | 0.9500     |
| C(7)-C(12)   | 1.512(6)   |
| C(7)-C(8)    | 1.520(6)   |
| C(7)-H(7)    | 1.0000     |
| C(8)-C(9)    | 1.531(7)   |
| C(8)-H(8A)   | 0.9900     |
| C(8)-H(8B)   | 0.9900     |
| C(9)-C(10)   | 1.516(7)   |
| C(9)-H(9A)   | 0.9900     |
| C(9)-H(9B)   | 0.9900     |
| C(10)-C(11)  | 1.520(7)   |
| C(10)-H(10A) | 0.9900     |
| C(10)-H(10B) | 0.9900     |
| C(11)-C(12)  | 1.526(7)   |
| C(11)-H(11A) | 0.9900     |
| C(11)-H(11B) | 0.9900     |
| C(12)-H(12A) | 0.9900     |
| C(12)-H(12B) | 0.9900     |
| C(13)-C(18)  | 1.525(6)   |
| C(13)-C(14)  | 1.533(5)   |
| C(13)-H(13)  | 1.0000     |
| C(14)-C(15)  | 1.530(6)   |
| C(14)-H(14A) | 0.9900     |
| C(14)-H(14B) | 0.9900     |
| C(15)-C(16)  | 1.508(6)   |
| C(15)-H(15A) | 0.9900     |
| C(15)-H(15B) | 0.9900     |
| C(16)-C(17)  | 1.519(6)   |

|              |          |
|--------------|----------|
| C(16)-H(16A) | 0.9900   |
| C(16)-H(16B) | 0.9900   |
| C(17)-C(18)  | 1.519(6) |
| C(17)-H(17A) | 0.9900   |
| C(17)-H(17B) | 0.9900   |
| C(18)-H(18A) | 0.9900   |
| C(18)-H(18B) | 0.9900   |
| C(19)-C(24)  | 1.403(5) |
| C(19)-C(20)  | 1.404(6) |
| C(20)-C(21)  | 1.384(6) |
| C(20)-H(20)  | 0.9500   |
| C(21)-C(22)  | 1.383(6) |
| C(21)-H(21)  | 0.9500   |
| C(22)-C(23)  | 1.375(6) |
| C(22)-H(22)  | 0.9500   |
| C(23)-C(24)  | 1.407(5) |
| C(23)-H(23)  | 0.9500   |
| C(24)-C(25)  | 1.501(5) |
| C(25)-C(30)  | 1.403(6) |
| C(25)-C(26)  | 1.411(6) |
| C(26)-C(27)  | 1.390(6) |
| C(26)-C(31)  | 1.508(6) |
| C(27)-C(28)  | 1.382(6) |
| C(27)-H(27)  | 0.9500   |
| C(28)-C(29)  | 1.385(6) |
| C(28)-C(34)  | 1.518(6) |
| C(29)-C(30)  | 1.394(6) |
| C(29)-H(29)  | 0.9500   |
| C(30)-C(37)  | 1.517(6) |
| C(31)-C(32)  | 1.524(6) |
| C(31)-C(33)  | 1.532(6) |
| C(31)-H(31)  | 1.0000   |
| C(32)-H(32A) | 0.9800   |
| C(32)-H(32B) | 0.9800   |
| C(32)-H(32C) | 0.9800   |
| C(33)-H(33A) | 0.9800   |
| C(33)-H(33B) | 0.9800   |
| C(33)-H(33C) | 0.9800   |
| C(34)-C(35)  | 1.519(6) |
| C(34)-C(36)  | 1.521(7) |
| C(34)-H(34)  | 1.0000   |
| C(35)-H(35A) | 0.9800   |
| C(35)-H(35B) | 0.9800   |
| C(35)-H(35C) | 0.9800   |
| C(36)-H(36A) | 0.9800   |
| C(36)-H(36B) | 0.9800   |
| C(36)-H(36C) | 0.9800   |
| C(37)-C(39)  | 1.528(6) |
| C(37)-C(38)  | 1.534(6) |

|              |           |
|--------------|-----------|
| C(37)-H(37)  | 1.0000    |
| C(38)-H(38A) | 0.9800    |
| C(38)-H(38B) | 0.9800    |
| C(38)-H(38C) | 0.9800    |
| C(39)-H(39A) | 0.9800    |
| C(39)-H(39B) | 0.9800    |
| C(39)-H(39C) | 0.9800    |
| C(40)-F(1)   | 1.301(10) |
| C(40)-F(2A)  | 1.303(11) |
| C(40)-F(3A)  | 1.340(14) |
| C(40)-F(2)   | 1.359(10) |
| C(40)-F(3)   | 1.382(12) |
| C(40)-F(1A)  | 1.401(12) |

|                  |            |
|------------------|------------|
| P(1)-Au(1)-S(1)  | 173.25(4)  |
| C(1)-S(1)-Au(1)  | 106.71(16) |
| C(19)-P(1)-C(13) | 103.45(18) |
| C(19)-P(1)-C(7)  | 107.21(18) |
| C(13)-P(1)-C(7)  | 104.36(19) |
| C(19)-P(1)-Au(1) | 118.25(14) |
| C(13)-P(1)-Au(1) | 109.66(14) |
| C(7)-P(1)-Au(1)  | 112.67(13) |
| C(6)-C(1)-C(2)   | 116.7(4)   |
| C(6)-C(1)-S(1)   | 125.0(3)   |
| C(2)-C(1)-S(1)   | 118.3(4)   |
| C(3)-C(2)-C(1)   | 120.4(5)   |
| C(3)-C(2)-H(2)   | 119.8      |
| C(1)-C(2)-H(2)   | 119.8      |
| C(4)-C(3)-C(2)   | 122.7(4)   |
| C(4)-C(3)-C(40)  | 119.4(5)   |
| C(2)-C(3)-C(40)  | 117.9(5)   |
| C(3)-C(4)-C(5)   | 117.6(5)   |
| C(3)-C(4)-H(4)   | 121.2      |
| C(5)-C(4)-H(4)   | 121.2      |
| C(6)-C(5)-C(4)   | 121.2(4)   |
| C(6)-C(5)-C(41)  | 119.2(4)   |
| C(4)-C(5)-C(41)  | 119.6(4)   |
| C(5)-C(6)-C(1)   | 121.5(4)   |
| C(5)-C(6)-H(6)   | 119.2      |
| C(1)-C(6)-H(6)   | 119.2      |
| C(12)-C(7)-C(8)  | 109.8(4)   |
| C(12)-C(7)-P(1)  | 113.8(3)   |
| C(8)-C(7)-P(1)   | 110.8(3)   |
| C(12)-C(7)-H(7)  | 107.4      |
| C(8)-C(7)-H(7)   | 107.4      |
| P(1)-C(7)-H(7)   | 107.4      |
| C(7)-C(8)-C(9)   | 111.9(4)   |
| C(7)-C(8)-H(8A)  | 109.2      |
| C(9)-C(8)-H(8A)  | 109.2      |

|                     |          |
|---------------------|----------|
| C(7)-C(8)-H(8B)     | 109.2    |
| C(9)-C(8)-H(8B)     | 109.2    |
| H(8A)-C(8)-H(8B)    | 107.9    |
| C(10)-C(9)-C(8)     | 110.7(4) |
| C(10)-C(9)-H(9A)    | 109.5    |
| C(8)-C(9)-H(9A)     | 109.5    |
| C(10)-C(9)-H(9B)    | 109.5    |
| C(8)-C(9)-H(9B)     | 109.5    |
| H(9A)-C(9)-H(9B)    | 108.1    |
| C(9)-C(10)-C(11)    | 109.0(4) |
| C(9)-C(10)-H(10A)   | 109.9    |
| C(11)-C(10)-H(10A)  | 109.9    |
| C(9)-C(10)-H(10B)   | 109.9    |
| C(11)-C(10)-H(10B)  | 109.9    |
| H(10A)-C(10)-H(10B) | 108.3    |
| C(10)-C(11)-C(12)   | 112.1(4) |
| C(10)-C(11)-H(11A)  | 109.2    |
| C(12)-C(11)-H(11A)  | 109.2    |
| C(10)-C(11)-H(11B)  | 109.2    |
| C(12)-C(11)-H(11B)  | 109.2    |
| H(11A)-C(11)-H(11B) | 107.9    |
| C(7)-C(12)-C(11)    | 111.3(4) |
| C(7)-C(12)-H(12A)   | 109.4    |
| C(11)-C(12)-H(12A)  | 109.4    |
| C(7)-C(12)-H(12B)   | 109.4    |
| C(11)-C(12)-H(12B)  | 109.4    |
| H(12A)-C(12)-H(12B) | 108.0    |
| C(18)-C(13)-C(14)   | 109.6(4) |
| C(18)-C(13)-P(1)    | 111.3(3) |
| C(14)-C(13)-P(1)    | 111.1(3) |
| C(18)-C(13)-H(13)   | 108.3    |
| C(14)-C(13)-H(13)   | 108.3    |
| P(1)-C(13)-H(13)    | 108.3    |
| C(15)-C(14)-C(13)   | 111.2(4) |
| C(15)-C(14)-H(14A)  | 109.4    |
| C(13)-C(14)-H(14A)  | 109.4    |
| C(15)-C(14)-H(14B)  | 109.4    |
| C(13)-C(14)-H(14B)  | 109.4    |
| H(14A)-C(14)-H(14B) | 108.0    |
| C(16)-C(15)-C(14)   | 112.5(4) |
| C(16)-C(15)-H(15A)  | 109.1    |
| C(14)-C(15)-H(15A)  | 109.1    |
| C(16)-C(15)-H(15B)  | 109.1    |
| C(14)-C(15)-H(15B)  | 109.1    |
| H(15A)-C(15)-H(15B) | 107.8    |
| C(15)-C(16)-C(17)   | 111.3(4) |
| C(15)-C(16)-H(16A)  | 109.4    |
| C(17)-C(16)-H(16A)  | 109.4    |
| C(15)-C(16)-H(16B)  | 109.4    |

|                     |          |
|---------------------|----------|
| C(17)-C(16)-H(16B)  | 109.4    |
| H(16A)-C(16)-H(16B) | 108.0    |
| C(18)-C(17)-C(16)   | 111.4(4) |
| C(18)-C(17)-H(17A)  | 109.3    |
| C(16)-C(17)-H(17A)  | 109.3    |
| C(18)-C(17)-H(17B)  | 109.3    |
| C(16)-C(17)-H(17B)  | 109.3    |
| H(17A)-C(17)-H(17B) | 108.0    |
| C(17)-C(18)-C(13)   | 111.6(3) |
| C(17)-C(18)-H(18A)  | 109.3    |
| C(13)-C(18)-H(18A)  | 109.3    |
| C(17)-C(18)-H(18B)  | 109.3    |
| C(13)-C(18)-H(18B)  | 109.3    |
| H(18A)-C(18)-H(18B) | 108.0    |
| C(24)-C(19)-C(20)   | 119.1(3) |
| C(24)-C(19)-P(1)    | 123.8(3) |
| C(20)-C(19)-P(1)    | 117.1(3) |
| C(21)-C(20)-C(19)   | 121.5(4) |
| C(21)-C(20)-H(20)   | 119.2    |
| C(19)-C(20)-H(20)   | 119.2    |
| C(22)-C(21)-C(20)   | 119.3(4) |
| C(22)-C(21)-H(21)   | 120.3    |
| C(20)-C(21)-H(21)   | 120.3    |
| C(23)-C(22)-C(21)   | 120.0(4) |
| C(23)-C(22)-H(22)   | 120.0    |
| C(21)-C(22)-H(22)   | 120.0    |
| C(22)-C(23)-C(24)   | 121.9(4) |
| C(22)-C(23)-H(23)   | 119.1    |
| C(24)-C(23)-H(23)   | 119.1    |
| C(19)-C(24)-C(23)   | 118.1(4) |
| C(19)-C(24)-C(25)   | 125.0(3) |
| C(23)-C(24)-C(25)   | 116.8(3) |
| C(30)-C(25)-C(26)   | 119.9(4) |
| C(30)-C(25)-C(24)   | 120.1(4) |
| C(26)-C(25)-C(24)   | 119.9(4) |
| C(27)-C(26)-C(25)   | 118.1(4) |
| C(27)-C(26)-C(31)   | 120.6(4) |
| C(25)-C(26)-C(31)   | 121.3(4) |
| C(28)-C(27)-C(26)   | 123.5(4) |
| C(28)-C(27)-H(27)   | 118.3    |
| C(26)-C(27)-H(27)   | 118.3    |
| C(27)-C(28)-C(29)   | 117.0(4) |
| C(27)-C(28)-C(34)   | 119.5(4) |
| C(29)-C(28)-C(34)   | 123.4(4) |
| C(28)-C(29)-C(30)   | 122.6(4) |
| C(28)-C(29)-H(29)   | 118.7    |
| C(30)-C(29)-H(29)   | 118.7    |
| C(29)-C(30)-C(25)   | 118.9(4) |
| C(29)-C(30)-C(37)   | 119.6(4) |

|                     |          |
|---------------------|----------|
| C(25)-C(30)-C(37)   | 121.4(4) |
| C(26)-C(31)-C(32)   | 110.3(4) |
| C(26)-C(31)-C(33)   | 113.6(4) |
| C(32)-C(31)-C(33)   | 110.0(4) |
| C(26)-C(31)-H(31)   | 107.6    |
| C(32)-C(31)-H(31)   | 107.6    |
| C(33)-C(31)-H(31)   | 107.6    |
| C(31)-C(32)-H(32A)  | 109.5    |
| C(31)-C(32)-H(32B)  | 109.5    |
| H(32A)-C(32)-H(32B) | 109.5    |
| C(31)-C(32)-H(32C)  | 109.5    |
| H(32A)-C(32)-H(32C) | 109.5    |
| H(32B)-C(32)-H(32C) | 109.5    |
| C(31)-C(33)-H(33A)  | 109.5    |
| C(31)-C(33)-H(33B)  | 109.5    |
| H(33A)-C(33)-H(33B) | 109.5    |
| C(31)-C(33)-H(33C)  | 109.5    |
| H(33A)-C(33)-H(33C) | 109.5    |
| H(33B)-C(33)-H(33C) | 109.5    |
| C(28)-C(34)-C(35)   | 110.6(4) |
| C(28)-C(34)-C(36)   | 114.7(4) |
| C(35)-C(34)-C(36)   | 110.6(4) |
| C(28)-C(34)-H(34)   | 106.8    |
| C(35)-C(34)-H(34)   | 106.8    |
| C(36)-C(34)-H(34)   | 106.8    |
| C(34)-C(35)-H(35A)  | 109.5    |
| C(34)-C(35)-H(35B)  | 109.5    |
| H(35A)-C(35)-H(35B) | 109.5    |
| C(34)-C(35)-H(35C)  | 109.5    |
| H(35A)-C(35)-H(35C) | 109.5    |
| H(35B)-C(35)-H(35C) | 109.5    |
| C(34)-C(36)-H(36A)  | 109.5    |
| C(34)-C(36)-H(36B)  | 109.5    |
| H(36A)-C(36)-H(36B) | 109.5    |
| C(34)-C(36)-H(36C)  | 109.5    |
| H(36A)-C(36)-H(36C) | 109.5    |
| H(36B)-C(36)-H(36C) | 109.5    |
| C(30)-C(37)-C(39)   | 113.5(4) |
| C(30)-C(37)-C(38)   | 110.2(3) |
| C(39)-C(37)-C(38)   | 109.4(4) |
| C(30)-C(37)-H(37)   | 107.9    |
| C(39)-C(37)-H(37)   | 107.9    |
| C(38)-C(37)-H(37)   | 107.9    |
| C(37)-C(38)-H(38A)  | 109.5    |
| C(37)-C(38)-H(38B)  | 109.5    |
| H(38A)-C(38)-H(38B) | 109.5    |
| C(37)-C(38)-H(38C)  | 109.5    |
| H(38A)-C(38)-H(38C) | 109.5    |
| H(38B)-C(38)-H(38C) | 109.5    |



|                     |          |
|---------------------|----------|
| C(37)-C(39)-H(39A)  | 109.5    |
| C(37)-C(39)-H(39B)  | 109.5    |
| H(39A)-C(39)-H(39B) | 109.5    |
| C(37)-C(39)-H(39C)  | 109.5    |
| H(39A)-C(39)-H(39C) | 109.5    |
| H(39B)-C(39)-H(39C) | 109.5    |
| F(2A)-C(40)-F(3A)   | 110.8(7) |
| F(1)-C(40)-F(2)     | 105.6(6) |
| F(1)-C(40)-F(3)     | 105.6(7) |
| F(2)-C(40)-F(3)     | 101.6(7) |
| F(2A)-C(40)-F(1A)   | 100.9(7) |
| F(3A)-C(40)-F(1A)   | 101.5(7) |
| F(1)-C(40)-C(3)     | 117.9(6) |
| F(2A)-C(40)-C(3)    | 114.1(6) |
| F(3A)-C(40)-C(3)    | 117.5(6) |
| F(2)-C(40)-C(3)     | 113.6(5) |
| F(3)-C(40)-C(3)     | 111.1(5) |
| F(1A)-C(40)-C(3)    | 110.0(6) |
| F(4)-C(41)-F(5)     | 107.1(4) |
| F(4)-C(41)-F(6)     | 105.0(4) |
| F(5)-C(41)-F(6)     | 105.2(4) |
| F(4)-C(41)-C(5)     | 113.3(4) |
| F(5)-C(41)-C(5)     | 113.7(4) |
| F(6)-C(41)-C(5)     | 111.7(4) |

---

Table S22. Anisotropic displacement parameters ( $\text{\AA}^2 \times 10^3$ ) for cldr09. The anisotropic displacement factor exponent takes the form:  $-2\pi^2 [h^2 a^{*2} U^{11} + \dots + 2 h k a^* b^* U^{12}]$

|       | $U^{11}$ | $U^{22}$ | $U^{33}$ | $U^{23}$ | $U^{13}$ | $U^{12}$ |
|-------|----------|----------|----------|----------|----------|----------|
| Au(1) | 20(1)    | 26(1)    | 17(1)    | 1(1)     | 7(1)     | 3(1)     |
| S(1)  | 36(1)    | 31(1)    | 26(1)    | 3(1)     | 18(1)    | 3(1)     |
| P(1)  | 16(1)    | 24(1)    | 15(1)    | -1(1)    | 5(1)     | 1(1)     |
| F(4)  | 95(2)    | 41(2)    | 42(2)    | -13(2)   | 13(2)    | -22(2)   |
| F(5)  | 61(2)    | 48(2)    | 56(2)    | 2(2)     | 33(2)    | -8(2)    |
| F(6)  | 56(2)    | 49(2)    | 62(2)    | 18(2)    | 12(2)    | 11(2)    |
| C(1)  | 20(2)    | 38(3)    | 21(2)    | 3(2)     | 2(2)     | 2(2)     |
| C(2)  | 33(2)    | 35(3)    | 28(2)    | -1(2)    | 12(2)    | 4(2)     |
| C(3)  | 31(2)    | 43(3)    | 30(2)    | -5(2)    | 14(2)    | -1(2)    |
| C(4)  | 33(2)    | 36(3)    | 33(2)    | -4(2)    | 11(2)    | -1(2)    |
| C(5)  | 24(2)    | 29(3)    | 27(2)    | -3(2)    | 5(2)     | 0(2)     |
| C(6)  | 24(2)    | 30(3)    | 28(2)    | 2(2)     | 11(2)    | -1(2)    |
| C(7)  | 23(2)    | 21(2)    | 19(2)    | -2(2)    | 9(2)     | -2(2)    |
| C(8)  | 43(3)    | 25(3)    | 27(2)    | -2(2)    | 2(2)     | -10(2)   |
| C(9)  | 47(3)    | 35(3)    | 38(3)    | 0(2)     | -4(2)    | -9(2)    |
| C(10) | 38(3)    | 31(3)    | 48(3)    | -1(2)    | 2(2)     | -7(2)    |
| C(11) | 55(3)    | 39(3)    | 43(3)    | 17(3)    | -7(3)    | -16(3)   |
| C(12) | 41(3)    | 37(3)    | 38(3)    | 9(2)     | -10(2)   | -6(2)    |
| C(13) | 16(2)    | 27(2)    | 19(2)    | -2(2)    | 6(2)     | 3(2)     |
| C(14) | 19(2)    | 32(3)    | 27(2)    | -6(2)    | -2(2)    | 5(2)     |
| C(15) | 23(2)    | 28(3)    | 42(3)    | -1(2)    | 2(2)     | 2(2)     |
| C(16) | 35(2)    | 26(3)    | 37(3)    | -3(2)    | 1(2)     | 3(2)     |
| C(17) | 38(2)    | 24(3)    | 30(2)    | -11(2)   | 3(2)     | 3(2)     |
| C(18) | 24(2)    | 31(3)    | 28(2)    | -4(2)    | 1(2)     | 0(2)     |
| C(19) | 26(2)    | 14(2)    | 17(2)    | -3(2)    | 4(2)     | 0(2)     |
| C(20) | 27(2)    | 26(3)    | 20(2)    | 1(2)     | 8(2)     | 1(2)     |
| C(21) | 38(2)    | 35(3)    | 18(2)    | -3(2)    | 9(2)     | -4(2)    |
| C(22) | 29(2)    | 34(3)    | 17(2)    | 1(2)     | -4(2)    | -2(2)    |
| C(23) | 23(2)    | 26(3)    | 25(2)    | 1(2)     | 5(2)     | 0(2)     |
| C(24) | 21(2)    | 13(2)    | 20(2)    | 1(2)     | 3(2)     | -2(2)    |
| C(25) | 13(2)    | 23(2)    | 18(2)    | 0(2)     | 4(2)     | -2(2)    |
| C(26) | 17(2)    | 19(2)    | 26(2)    | 6(2)     | 3(2)     | 1(2)     |
| C(27) | 20(2)    | 27(3)    | 30(2)    | 14(2)    | 7(2)     | -1(2)    |
| C(28) | 18(2)    | 29(3)    | 26(2)    | 6(2)     | 8(2)     | 5(2)     |
| C(29) | 23(2)    | 25(3)    | 25(2)    | 1(2)     | 9(2)     | 4(2)     |
| C(30) | 16(2)    | 22(2)    | 19(2)    | 2(2)     | 1(2)     | 2(2)     |
| C(31) | 28(2)    | 22(3)    | 32(2)    | 6(2)     | 13(2)    | -1(2)    |
| C(32) | 43(3)    | 30(3)    | 45(3)    | 0(2)     | 3(2)     | -3(2)    |
| C(33) | 30(2)    | 23(3)    | 43(3)    | 8(2)     | 12(2)    | 2(2)     |
| C(34) | 28(2)    | 43(3)    | 33(2)    | 8(2)     | 15(2)    | 5(2)     |
| C(35) | 39(3)    | 69(5)    | 59(3)    | -7(3)    | 31(3)    | -14(3)   |
| C(36) | 44(3)    | 54(4)    | 39(3)    | -2(2)    | 26(2)    | -4(3)    |
| C(37) | 28(2)    | 20(2)    | 27(2)    | 2(2)     | 12(2)    | 1(2)     |
| C(38) | 40(3)    | 31(3)    | 32(2)    | 11(2)    | 9(2)     | 6(2)     |

|       |       |        |       |       |       |       |
|-------|-------|--------|-------|-------|-------|-------|
| C(39) | 47(3) | 30(3)  | 37(3) | -4(2) | 19(2) | -9(2) |
| C(40) | 62(4) | 43(4)  | 46(3) | -8(3) | 31(3) | 3(3)  |
| C(41) | 40(3) | 35(3)  | 31(2) | -1(2) | 8(2)  | -1(2) |
| F(1)  | 90(3) | 101(3) | 66(2) | -9(2) | 57(2) | -8(3) |
| F(2)  | 90(3) | 101(3) | 66(2) | -9(2) | 57(2) | -8(3) |
| F(3)  | 90(3) | 101(3) | 66(2) | -9(2) | 57(2) | -8(3) |
| F(1A) | 90(3) | 101(3) | 66(2) | -9(2) | 57(2) | -8(3) |
| F(2A) | 90(3) | 101(3) | 66(2) | -9(2) | 57(2) | -8(3) |
| F(3A) | 90(3) | 101(3) | 66(2) | -9(2) | 57(2) | -8(3) |

---

Table S23. Torsion angles [°] for cldr09.

|                         |           |
|-------------------------|-----------|
| Au(1)-S(1)-C(1)-C(6)    | -5.4(4)   |
| Au(1)-S(1)-C(1)-C(2)    | 175.2(3)  |
| C(6)-C(1)-C(2)-C(3)     | 0.4(6)    |
| S(1)-C(1)-C(2)-C(3)     | 179.8(3)  |
| C(1)-C(2)-C(3)-C(4)     | -0.5(7)   |
| C(1)-C(2)-C(3)-C(40)    | 176.8(4)  |
| C(2)-C(3)-C(4)-C(5)     | 0.2(7)    |
| C(40)-C(3)-C(4)-C(5)    | -177.1(4) |
| C(3)-C(4)-C(5)-C(6)     | 0.3(6)    |
| C(3)-C(4)-C(5)-C(41)    | 178.9(4)  |
| C(4)-C(5)-C(6)-C(1)     | -0.4(6)   |
| C(41)-C(5)-C(6)-C(1)    | -179.1(4) |
| C(2)-C(1)-C(6)-C(5)     | 0.1(6)    |
| S(1)-C(1)-C(6)-C(5)     | -179.3(3) |
| C(19)-P(1)-C(7)-C(12)   | 27.5(4)   |
| C(13)-P(1)-C(7)-C(12)   | 136.9(3)  |
| Au(1)-P(1)-C(7)-C(12)   | -104.2(3) |
| C(19)-P(1)-C(7)-C(8)    | 151.9(3)  |
| C(13)-P(1)-C(7)-C(8)    | -98.8(3)  |
| Au(1)-P(1)-C(7)-C(8)    | 20.1(3)   |
| C(12)-C(7)-C(8)-C(9)    | -55.8(5)  |
| P(1)-C(7)-C(8)-C(9)     | 177.6(3)  |
| C(7)-C(8)-C(9)-C(10)    | 57.9(6)   |
| C(8)-C(9)-C(10)-C(11)   | -57.0(6)  |
| C(9)-C(10)-C(11)-C(12)  | 57.1(6)   |
| C(8)-C(7)-C(12)-C(11)   | 54.7(6)   |
| P(1)-C(7)-C(12)-C(11)   | 179.6(4)  |
| C(10)-C(11)-C(12)-C(7)  | -56.9(6)  |
| C(19)-P(1)-C(13)-C(18)  | -63.6(3)  |
| C(7)-P(1)-C(13)-C(18)   | -175.7(3) |
| Au(1)-P(1)-C(13)-C(18)  | 63.4(3)   |
| C(19)-P(1)-C(13)-C(14)  | 173.9(3)  |
| C(7)-P(1)-C(13)-C(14)   | 61.9(3)   |
| Au(1)-P(1)-C(13)-C(14)  | -59.0(3)  |
| C(18)-C(13)-C(14)-C(15) | 55.4(5)   |
| P(1)-C(13)-C(14)-C(15)  | 178.8(3)  |
| C(13)-C(14)-C(15)-C(16) | -54.6(5)  |
| C(14)-C(15)-C(16)-C(17) | 53.5(5)   |
| C(15)-C(16)-C(17)-C(18) | -54.3(6)  |
| C(16)-C(17)-C(18)-C(13) | 56.9(5)   |
| C(14)-C(13)-C(18)-C(17) | -57.1(5)  |
| P(1)-C(13)-C(18)-C(17)  | 179.6(3)  |
| C(13)-P(1)-C(19)-C(24)  | 130.8(4)  |
| C(7)-P(1)-C(19)-C(24)   | -119.2(4) |
| Au(1)-P(1)-C(19)-C(24)  | 9.4(4)    |
| C(13)-P(1)-C(19)-C(20)  | -47.2(4)  |
| C(7)-P(1)-C(19)-C(20)   | 62.7(4)   |

|                         |           |
|-------------------------|-----------|
| Au(1)-P(1)-C(19)-C(20)  | -168.6(3) |
| C(24)-C(19)-C(20)-C(21) | -0.1(6)   |
| P(1)-C(19)-C(20)-C(21)  | 178.1(4)  |
| C(19)-C(20)-C(21)-C(22) | -0.6(7)   |
| C(20)-C(21)-C(22)-C(23) | 0.7(7)    |
| C(21)-C(22)-C(23)-C(24) | -0.3(7)   |
| C(20)-C(19)-C(24)-C(23) | 0.5(6)    |
| P(1)-C(19)-C(24)-C(23)  | -177.5(3) |
| C(20)-C(19)-C(24)-C(25) | -179.3(4) |
| P(1)-C(19)-C(24)-C(25)  | 2.7(6)    |
| C(22)-C(23)-C(24)-C(19) | -0.4(7)   |
| C(22)-C(23)-C(24)-C(25) | 179.5(4)  |
| C(19)-C(24)-C(25)-C(30) | 94.1(5)   |
| C(23)-C(24)-C(25)-C(30) | -85.7(5)  |
| C(19)-C(24)-C(25)-C(26) | -89.6(5)  |
| C(23)-C(24)-C(25)-C(26) | 90.5(5)   |
| C(30)-C(25)-C(26)-C(27) | -2.3(5)   |
| C(24)-C(25)-C(26)-C(27) | -178.6(3) |
| C(30)-C(25)-C(26)-C(31) | 175.2(3)  |
| C(24)-C(25)-C(26)-C(31) | -1.0(5)   |
| C(25)-C(26)-C(27)-C(28) | 0.1(6)    |
| C(31)-C(26)-C(27)-C(28) | -177.5(4) |
| C(26)-C(27)-C(28)-C(29) | 1.9(6)    |
| C(26)-C(27)-C(28)-C(34) | -177.2(4) |
| C(27)-C(28)-C(29)-C(30) | -1.6(6)   |
| C(34)-C(28)-C(29)-C(30) | 177.4(4)  |
| C(28)-C(29)-C(30)-C(25) | -0.6(6)   |
| C(28)-C(29)-C(30)-C(37) | 175.7(4)  |
| C(26)-C(25)-C(30)-C(29) | 2.6(5)    |
| C(24)-C(25)-C(30)-C(29) | 178.8(3)  |
| C(26)-C(25)-C(30)-C(37) | -173.6(3) |
| C(24)-C(25)-C(30)-C(37) | 2.6(5)    |
| C(27)-C(26)-C(31)-C(32) | 80.3(5)   |
| C(25)-C(26)-C(31)-C(32) | -97.1(4)  |
| C(27)-C(26)-C(31)-C(33) | -43.7(5)  |
| C(25)-C(26)-C(31)-C(33) | 138.9(4)  |
| C(27)-C(28)-C(34)-C(35) | -65.1(5)  |
| C(29)-C(28)-C(34)-C(35) | 115.9(5)  |
| C(27)-C(28)-C(34)-C(36) | 169.0(4)  |
| C(29)-C(28)-C(34)-C(36) | -10.0(6)  |
| C(29)-C(30)-C(37)-C(39) | 46.6(5)   |
| C(25)-C(30)-C(37)-C(39) | -137.2(4) |
| C(29)-C(30)-C(37)-C(38) | -76.5(5)  |
| C(25)-C(30)-C(37)-C(38) | 99.7(4)   |
| C(4)-C(3)-C(40)-F(1)    | -6.9(9)   |
| C(2)-C(3)-C(40)-F(1)    | 175.7(7)  |
| C(4)-C(3)-C(40)-F(2A)   | 68.4(8)   |
| C(2)-C(3)-C(40)-F(2A)   | -109.0(8) |
| C(4)-C(3)-C(40)-F(3A)   | -159.5(7) |

|                       |           |
|-----------------------|-----------|
| C(2)-C(3)-C(40)-F(3A) | 23.1(9)   |
| C(4)-C(3)-C(40)-F(2)  | 117.3(7)  |
| C(2)-C(3)-C(40)-F(2)  | -60.1(8)  |
| C(4)-C(3)-C(40)-F(3)  | -128.9(7) |
| C(2)-C(3)-C(40)-F(3)  | 53.7(8)   |
| C(4)-C(3)-C(40)-F(1A) | -44.1(8)  |
| C(2)-C(3)-C(40)-F(1A) | 138.5(7)  |
| C(6)-C(5)-C(41)-F(4)  | -146.0(4) |
| C(4)-C(5)-C(41)-F(4)  | 35.3(6)   |
| C(6)-C(5)-C(41)-F(5)  | -23.3(6)  |
| C(4)-C(5)-C(41)-F(5)  | 158.0(4)  |
| C(6)-C(5)-C(41)-F(6)  | 95.6(5)   |
| C(4)-C(5)-C(41)-F(6)  | -83.1(5)  |

---

## Compound 6

Table S24. Crystal data and structure refinement for cldr10.

|                                   |                                             |                              |
|-----------------------------------|---------------------------------------------|------------------------------|
| Identification code               | cldr10                                      |                              |
| Empirical formula                 | C40 H53 Au F3 P S                           |                              |
| Formula weight                    | 850.82                                      |                              |
| Temperature                       | 130(2) K                                    |                              |
| Wavelength                        | 0.71073 Å                                   |                              |
| Crystal system                    | Triclinic                                   |                              |
| Space group                       | P -1                                        |                              |
| Unit cell dimensions              | a = 10.5002(4) Å                            | $\alpha = 83.432(3)^\circ$ . |
|                                   | b = 12.5850(5) Å                            | $\beta = 75.794(3)^\circ$ .  |
|                                   | c = 16.0270(6) Å                            | $\gamma = 69.324(3)^\circ$ . |
| Volume                            | 1919.99(14) Å <sup>3</sup>                  |                              |
| Z                                 | 2                                           |                              |
| Density (calculated)              | 1.472 Mg/m <sup>3</sup>                     |                              |
| Absorption coefficient            | 3.968 mm <sup>-1</sup>                      |                              |
| F(000)                            | 860                                         |                              |
| Crystal size                      | 0.600 x 0.540 x 0.350 mm <sup>3</sup>       |                              |
| Theta range for data collection   | 3.580 to 29.602°.                           |                              |
| Index ranges                      | -13<=h<=14, -17<=k<=17, -20<=l<=21          |                              |
| Reflections collected             | 21341                                       |                              |
| Independent reflections           | 9139 [R(int) = 0.0272]                      |                              |
| Completeness to theta = 25.242°   | 99.7 %                                      |                              |
| Absorption correction             | Analytical                                  |                              |
| Max. and min. transmission        | 0.335 and 0.193                             |                              |
| Refinement method                 | Full-matrix least-squares on F <sup>2</sup> |                              |
| Data / restraints / parameters    | 9139 / 0 / 419                              |                              |
| Goodness-of-fit on F <sup>2</sup> | 1.048                                       |                              |
| Final R indices [I>2sigma(I)]     | R1 = 0.0264, wR2 = 0.0582                   |                              |
| R indices (all data)              | R1 = 0.0321, wR2 = 0.0609                   |                              |
| Extinction coefficient            | n/a                                         |                              |
| Largest diff. peak and hole       | 1.213 and -1.086 e.Å <sup>-3</sup>          |                              |

Table 2. Atomic coordinates ( $\times 10^4$ ) and equivalent isotropic displacement parameters ( $\text{\AA}^2 \times 10^3$ ) for cldr10.  $U(\text{eq})$  is defined as one third of the trace of the orthogonalized  $U^{ij}$  tensor.

|       | x        | y        | z        | U(eq)  |
|-------|----------|----------|----------|--------|
| Au(1) | -4092(1) | 8346(1)  | 7617(1)  | 22(1)  |
| S(1)  | -3997(1) | 9873(1)  | 8231(1)  | 35(1)  |
| P(1)  | -4003(1) | 6793(1)  | 6992(1)  | 18(1)  |
| C(1)  | -3033(3) | 10526(2) | 7429(2)  | 26(1)  |
| C(2)  | -2724(4) | 11423(3) | 7669(2)  | 45(1)  |
| C(3)  | -1982(4) | 11988(3) | 7085(3)  | 49(1)  |
| C(4)  | -1520(3) | 11681(3) | 6236(2)  | 35(1)  |
| C(5)  | -1801(4) | 10792(3) | 5983(2)  | 35(1)  |
| C(6)  | -2550(3) | 10223(3) | 6574(2)  | 30(1)  |
| C(7)  | -4430(3) | 7136(2)  | 5920(2)  | 22(1)  |
| C(8)  | -3981(3) | 8125(3)  | 5461(2)  | 29(1)  |
| C(9)  | -4481(4) | 8479(3)  | 4616(2)  | 37(1)  |
| C(10) | -3986(5) | 7484(3)  | 4029(2)  | 45(1)  |
| C(11) | -4423(4) | 6504(3)  | 4484(2)  | 43(1)  |
| C(12) | -3925(4) | 6130(3)  | 5323(2)  | 32(1)  |
| C(13) | -2248(3) | 5720(2)  | 6894(2)  | 21(1)  |
| C(14) | -1124(3) | 6187(3)  | 6366(2)  | 29(1)  |
| C(15) | 338(3)   | 5320(3)  | 6341(2)  | 37(1)  |
| C(16) | 579(3)   | 4941(3)  | 7237(2)  | 39(1)  |
| C(17) | -532(3)  | 4474(3)  | 7765(2)  | 38(1)  |
| C(18) | -1991(3) | 5337(3)  | 7799(2)  | 32(1)  |
| C(19) | -5170(3) | 6033(2)  | 7563(2)  | 19(1)  |
| C(20) | -4870(3) | 4902(2)  | 7365(2)  | 24(1)  |
| C(21) | -5735(3) | 4299(2)  | 7762(2)  | 26(1)  |
| C(22) | -6928(3) | 4815(3)  | 8371(2)  | 26(1)  |
| C(23) | -7231(3) | 5920(2)  | 8575(2)  | 24(1)  |
| C(24) | -6371(3) | 6551(2)  | 8190(2)  | 18(1)  |
| C(25) | -6805(3) | 7748(2)  | 8474(2)  | 19(1)  |
| C(26) | -6354(3) | 7960(2)  | 9181(2)  | 23(1)  |
| C(27) | -6833(3) | 9071(3)  | 9457(2)  | 28(1)  |
| C(28) | -7724(3) | 9961(2)  | 9058(2)  | 31(1)  |
| C(29) | -8155(3) | 9727(3)  | 8377(2)  | 30(1)  |
| C(30) | -7716(3) | 8634(2)  | 8074(2)  | 24(1)  |
| C(31) | -5397(3) | 6998(3)  | 9633(2)  | 27(1)  |
| C(32) | -6228(4) | 6487(3)  | 10391(2) | 38(1)  |
| C(33) | -4332(4) | 7348(3)  | 9937(2)  | 39(1)  |
| C(34) | -8189(4) | 11167(3) | 9371(3)  | 47(1)  |
| C(35) | -9775(6) | 11628(4) | 9707(5)  | 113(3) |
| C(36) | -7795(5) | 11965(3) | 8658(3)  | 58(1)  |
| C(37) | -8259(4) | 8420(3)  | 7338(2)  | 38(1)  |
| C(38) | -9736(4) | 8375(4)  | 7656(3)  | 62(1)  |
| C(39) | -8213(5) | 9298(4)  | 6597(3)  | 55(1)  |
| C(40) | -741(5)  | 12295(3) | 5612(3)  | 56(1)  |
| F(1)  | -95(6)   | 11822(4) | 4881(3)  | 78(1)  |



|       |          |           |         |       |
|-------|----------|-----------|---------|-------|
| F(2)  | 354(5)   | 12397(3)  | 5926(3) | 78(1) |
| F(3)  | -1474(5) | 13381(4)  | 5523(3) | 78(1) |
| F(1A) | -957(14) | 12290(10) | 4750(7) | 78(1) |
| F(2A) | 600(13)  | 11689(9)  | 5297(7) | 78(1) |
| F(3A) | -817(14) | 13302(11) | 5688(8) | 78(1) |

---

Table S25. Bond lengths [Å] and angles [°] for cldr10.

---

|              |           |
|--------------|-----------|
| Au(1)-P(1)   | 2.2598(7) |
| Au(1)-S(1)   | 2.2982(7) |
| S(1)-C(1)    | 1.748(3)  |
| P(1)-C(19)   | 1.825(3)  |
| P(1)-C(13)   | 1.842(3)  |
| P(1)-C(7)    | 1.847(3)  |
| C(1)-C(6)    | 1.388(4)  |
| C(1)-C(2)    | 1.396(4)  |
| C(2)-C(3)    | 1.367(5)  |
| C(2)-H(2)    | 0.9500    |
| C(3)-C(4)    | 1.379(5)  |
| C(3)-H(3)    | 0.9500    |
| C(4)-C(5)    | 1.378(5)  |
| C(4)-C(40)   | 1.461(5)  |
| C(5)-C(6)    | 1.380(4)  |
| C(5)-H(5)    | 0.9500    |
| C(6)-H(6)    | 0.9500    |
| C(7)-C(8)    | 1.532(4)  |
| C(7)-C(12)   | 1.534(4)  |
| C(7)-H(7)    | 1.0000    |
| C(8)-C(9)    | 1.534(4)  |
| C(8)-H(8A)   | 0.9900    |
| C(8)-H(8B)   | 0.9900    |
| C(9)-C(10)   | 1.514(5)  |
| C(9)-H(9A)   | 0.9900    |
| C(9)-H(9B)   | 0.9900    |
| C(10)-C(11)  | 1.514(5)  |
| C(10)-H(10A) | 0.9900    |
| C(10)-H(10B) | 0.9900    |
| C(11)-C(12)  | 1.527(5)  |
| C(11)-H(11A) | 0.9900    |
| C(11)-H(11B) | 0.9900    |
| C(12)-H(12A) | 0.9900    |
| C(12)-H(12B) | 0.9900    |
| C(13)-C(14)  | 1.529(4)  |
| C(13)-C(18)  | 1.534(4)  |
| C(13)-H(13)  | 1.0000    |
| C(14)-C(15)  | 1.531(4)  |
| C(14)-H(14A) | 0.9900    |
| C(14)-H(14B) | 0.9900    |
| C(15)-C(16)  | 1.513(5)  |
| C(15)-H(15A) | 0.9900    |
| C(15)-H(15B) | 0.9900    |
| C(16)-C(17)  | 1.519(5)  |
| C(16)-H(16A) | 0.9900    |
| C(16)-H(16B) | 0.9900    |
| C(17)-C(18)  | 1.525(4)  |

|              |          |
|--------------|----------|
| C(17)-H(17A) | 0.9900   |
| C(17)-H(17B) | 0.9900   |
| C(18)-H(18A) | 0.9900   |
| C(18)-H(18B) | 0.9900   |
| C(19)-C(20)  | 1.401(4) |
| C(19)-C(24)  | 1.405(4) |
| C(20)-C(21)  | 1.378(4) |
| C(20)-H(20)  | 0.9500   |
| C(21)-C(22)  | 1.384(4) |
| C(21)-H(21)  | 0.9500   |
| C(22)-C(23)  | 1.372(4) |
| C(22)-H(22)  | 0.9500   |
| C(23)-C(24)  | 1.395(4) |
| C(23)-H(23)  | 0.9500   |
| C(24)-C(25)  | 1.501(4) |
| C(25)-C(30)  | 1.398(4) |
| C(25)-C(26)  | 1.415(4) |
| C(26)-C(27)  | 1.393(4) |
| C(26)-C(31)  | 1.515(4) |
| C(27)-C(28)  | 1.388(5) |
| C(27)-H(27)  | 0.9500   |
| C(28)-C(29)  | 1.377(5) |
| C(28)-C(34)  | 1.524(4) |
| C(29)-C(30)  | 1.391(4) |
| C(29)-H(29)  | 0.9500   |
| C(30)-C(37)  | 1.517(5) |
| C(31)-C(32)  | 1.532(4) |
| C(31)-C(33)  | 1.532(4) |
| C(31)-H(31)  | 1.0000   |
| C(32)-H(32A) | 0.9800   |
| C(32)-H(32B) | 0.9800   |
| C(32)-H(32C) | 0.9800   |
| C(33)-H(33A) | 0.9800   |
| C(33)-H(33B) | 0.9800   |
| C(33)-H(33C) | 0.9800   |
| C(34)-C(36)  | 1.511(5) |
| C(34)-C(35)  | 1.533(6) |
| C(34)-H(34)  | 1.0000   |
| C(35)-H(35A) | 0.9800   |
| C(35)-H(35B) | 0.9800   |
| C(35)-H(35C) | 0.9800   |
| C(36)-H(36A) | 0.9800   |
| C(36)-H(36B) | 0.9800   |
| C(36)-H(36C) | 0.9800   |
| C(37)-C(38)  | 1.529(6) |
| C(37)-C(39)  | 1.531(5) |
| C(37)-H(37)  | 1.0000   |
| C(38)-H(38A) | 0.9800   |
| C(38)-H(38B) | 0.9800   |

|              |           |
|--------------|-----------|
| C(38)-H(38C) | 0.9800    |
| C(39)-H(39A) | 0.9800    |
| C(39)-H(39B) | 0.9800    |
| C(39)-H(39C) | 0.9800    |
| C(40)-F(3A)  | 1.260(13) |
| C(40)-F(1)   | 1.293(6)  |
| C(40)-F(3)   | 1.322(6)  |
| C(40)-F(2A)  | 1.341(13) |
| C(40)-F(2)   | 1.413(6)  |
| C(40)-F(1A)  | 1.455(13) |

|                  |            |
|------------------|------------|
| P(1)-Au(1)-S(1)  | 175.57(3)  |
| C(1)-S(1)-Au(1)  | 106.72(10) |
| C(19)-P(1)-C(13) | 103.96(13) |
| C(19)-P(1)-C(7)  | 104.11(12) |
| C(13)-P(1)-C(7)  | 109.68(13) |
| C(19)-P(1)-Au(1) | 117.12(9)  |
| C(13)-P(1)-Au(1) | 109.45(9)  |
| C(7)-P(1)-Au(1)  | 112.04(9)  |
| C(6)-C(1)-C(2)   | 117.3(3)   |
| C(6)-C(1)-S(1)   | 125.2(2)   |
| C(2)-C(1)-S(1)   | 117.5(2)   |
| C(3)-C(2)-C(1)   | 121.6(3)   |
| C(3)-C(2)-H(2)   | 119.2      |
| C(1)-C(2)-H(2)   | 119.2      |
| C(2)-C(3)-C(4)   | 120.3(3)   |
| C(2)-C(3)-H(3)   | 119.9      |
| C(4)-C(3)-H(3)   | 119.9      |
| C(5)-C(4)-C(3)   | 119.4(3)   |
| C(5)-C(4)-C(40)  | 120.5(3)   |
| C(3)-C(4)-C(40)  | 120.1(3)   |
| C(4)-C(5)-C(6)   | 120.3(3)   |
| C(4)-C(5)-H(5)   | 119.9      |
| C(6)-C(5)-H(5)   | 119.9      |
| C(5)-C(6)-C(1)   | 121.2(3)   |
| C(5)-C(6)-H(6)   | 119.4      |
| C(1)-C(6)-H(6)   | 119.4      |
| C(8)-C(7)-C(12)  | 110.9(2)   |
| C(8)-C(7)-P(1)   | 112.1(2)   |
| C(12)-C(7)-P(1)  | 115.6(2)   |
| C(8)-C(7)-H(7)   | 105.8      |
| C(12)-C(7)-H(7)  | 105.8      |
| P(1)-C(7)-H(7)   | 105.8      |
| C(7)-C(8)-C(9)   | 111.3(3)   |
| C(7)-C(8)-H(8A)  | 109.4      |
| C(9)-C(8)-H(8A)  | 109.4      |
| C(7)-C(8)-H(8B)  | 109.4      |
| C(9)-C(8)-H(8B)  | 109.4      |
| H(8A)-C(8)-H(8B) | 108.0      |

|                     |            |
|---------------------|------------|
| C(10)-C(9)-C(8)     | 111.5(3)   |
| C(10)-C(9)-H(9A)    | 109.3      |
| C(8)-C(9)-H(9A)     | 109.3      |
| C(10)-C(9)-H(9B)    | 109.3      |
| C(8)-C(9)-H(9B)     | 109.3      |
| H(9A)-C(9)-H(9B)    | 108.0      |
| C(11)-C(10)-C(9)    | 111.1(3)   |
| C(11)-C(10)-H(10A)  | 109.4      |
| C(9)-C(10)-H(10A)   | 109.4      |
| C(11)-C(10)-H(10B)  | 109.4      |
| C(9)-C(10)-H(10B)   | 109.4      |
| H(10A)-C(10)-H(10B) | 108.0      |
| C(10)-C(11)-C(12)   | 112.4(3)   |
| C(10)-C(11)-H(11A)  | 109.1      |
| C(12)-C(11)-H(11A)  | 109.1      |
| C(10)-C(11)-H(11B)  | 109.1      |
| C(12)-C(11)-H(11B)  | 109.1      |
| H(11A)-C(11)-H(11B) | 107.9      |
| C(11)-C(12)-C(7)    | 110.7(3)   |
| C(11)-C(12)-H(12A)  | 109.5      |
| C(7)-C(12)-H(12A)   | 109.5      |
| C(11)-C(12)-H(12B)  | 109.5      |
| C(7)-C(12)-H(12B)   | 109.5      |
| H(12A)-C(12)-H(12B) | 108.1      |
| C(14)-C(13)-C(18)   | 110.7(2)   |
| C(14)-C(13)-P(1)    | 111.4(2)   |
| C(18)-C(13)-P(1)    | 108.75(19) |
| C(14)-C(13)-H(13)   | 108.7      |
| C(18)-C(13)-H(13)   | 108.7      |
| P(1)-C(13)-H(13)    | 108.7      |
| C(13)-C(14)-C(15)   | 111.1(3)   |
| C(13)-C(14)-H(14A)  | 109.4      |
| C(15)-C(14)-H(14A)  | 109.4      |
| C(13)-C(14)-H(14B)  | 109.4      |
| C(15)-C(14)-H(14B)  | 109.4      |
| H(14A)-C(14)-H(14B) | 108.0      |
| C(16)-C(15)-C(14)   | 111.7(3)   |
| C(16)-C(15)-H(15A)  | 109.3      |
| C(14)-C(15)-H(15A)  | 109.3      |
| C(16)-C(15)-H(15B)  | 109.3      |
| C(14)-C(15)-H(15B)  | 109.3      |
| H(15A)-C(15)-H(15B) | 107.9      |
| C(15)-C(16)-C(17)   | 111.6(3)   |
| C(15)-C(16)-H(16A)  | 109.3      |
| C(17)-C(16)-H(16A)  | 109.3      |
| C(15)-C(16)-H(16B)  | 109.3      |
| C(17)-C(16)-H(16B)  | 109.3      |
| H(16A)-C(16)-H(16B) | 108.0      |
| C(16)-C(17)-C(18)   | 111.1(3)   |

|                     |          |
|---------------------|----------|
| C(16)-C(17)-H(17A)  | 109.4    |
| C(18)-C(17)-H(17A)  | 109.4    |
| C(16)-C(17)-H(17B)  | 109.4    |
| C(18)-C(17)-H(17B)  | 109.4    |
| H(17A)-C(17)-H(17B) | 108.0    |
| C(17)-C(18)-C(13)   | 111.5(3) |
| C(17)-C(18)-H(18A)  | 109.3    |
| C(13)-C(18)-H(18A)  | 109.3    |
| C(17)-C(18)-H(18B)  | 109.3    |
| C(13)-C(18)-H(18B)  | 109.3    |
| H(18A)-C(18)-H(18B) | 108.0    |
| C(20)-C(19)-C(24)   | 118.8(2) |
| C(20)-C(19)-P(1)    | 119.2(2) |
| C(24)-C(19)-P(1)    | 122.0(2) |
| C(21)-C(20)-C(19)   | 121.5(3) |
| C(21)-C(20)-H(20)   | 119.2    |
| C(19)-C(20)-H(20)   | 119.2    |
| C(20)-C(21)-C(22)   | 119.6(3) |
| C(20)-C(21)-H(21)   | 120.2    |
| C(22)-C(21)-H(21)   | 120.2    |
| C(23)-C(22)-C(21)   | 119.5(3) |
| C(23)-C(22)-H(22)   | 120.2    |
| C(21)-C(22)-H(22)   | 120.2    |
| C(22)-C(23)-C(24)   | 122.3(3) |
| C(22)-C(23)-H(23)   | 118.9    |
| C(24)-C(23)-H(23)   | 118.9    |
| C(23)-C(24)-C(19)   | 118.3(2) |
| C(23)-C(24)-C(25)   | 117.3(2) |
| C(19)-C(24)-C(25)   | 124.4(2) |
| C(30)-C(25)-C(26)   | 120.4(3) |
| C(30)-C(25)-C(24)   | 120.0(2) |
| C(26)-C(25)-C(24)   | 119.5(2) |
| C(27)-C(26)-C(25)   | 118.1(3) |
| C(27)-C(26)-C(31)   | 121.1(3) |
| C(25)-C(26)-C(31)   | 120.7(2) |
| C(28)-C(27)-C(26)   | 122.0(3) |
| C(28)-C(27)-H(27)   | 119.0    |
| C(26)-C(27)-H(27)   | 119.0    |
| C(29)-C(28)-C(27)   | 118.5(3) |
| C(29)-C(28)-C(34)   | 121.5(3) |
| C(27)-C(28)-C(34)   | 119.9(3) |
| C(28)-C(29)-C(30)   | 122.1(3) |
| C(28)-C(29)-H(29)   | 119.0    |
| C(30)-C(29)-H(29)   | 119.0    |
| C(29)-C(30)-C(25)   | 118.8(3) |
| C(29)-C(30)-C(37)   | 119.8(3) |
| C(25)-C(30)-C(37)   | 121.4(3) |
| C(26)-C(31)-C(32)   | 111.4(3) |
| C(26)-C(31)-C(33)   | 113.1(3) |

|                     |          |
|---------------------|----------|
| C(32)-C(31)-C(33)   | 110.0(3) |
| C(26)-C(31)-H(31)   | 107.3    |
| C(32)-C(31)-H(31)   | 107.3    |
| C(33)-C(31)-H(31)   | 107.3    |
| C(31)-C(32)-H(32A)  | 109.5    |
| C(31)-C(32)-H(32B)  | 109.5    |
| H(32A)-C(32)-H(32B) | 109.5    |
| C(31)-C(32)-H(32C)  | 109.5    |
| H(32A)-C(32)-H(32C) | 109.5    |
| H(32B)-C(32)-H(32C) | 109.5    |
| C(31)-C(33)-H(33A)  | 109.5    |
| C(31)-C(33)-H(33B)  | 109.5    |
| H(33A)-C(33)-H(33B) | 109.5    |
| C(31)-C(33)-H(33C)  | 109.5    |
| H(33A)-C(33)-H(33C) | 109.5    |
| H(33B)-C(33)-H(33C) | 109.5    |
| C(36)-C(34)-C(28)   | 111.5(3) |
| C(36)-C(34)-C(35)   | 108.1(4) |
| C(28)-C(34)-C(35)   | 110.7(3) |
| C(36)-C(34)-H(34)   | 108.8    |
| C(28)-C(34)-H(34)   | 108.8    |
| C(35)-C(34)-H(34)   | 108.8    |
| C(34)-C(35)-H(35A)  | 109.5    |
| C(34)-C(35)-H(35B)  | 109.5    |
| H(35A)-C(35)-H(35B) | 109.5    |
| C(34)-C(35)-H(35C)  | 109.5    |
| H(35A)-C(35)-H(35C) | 109.5    |
| H(35B)-C(35)-H(35C) | 109.5    |
| C(34)-C(36)-H(36A)  | 109.5    |
| C(34)-C(36)-H(36B)  | 109.5    |
| H(36A)-C(36)-H(36B) | 109.5    |
| C(34)-C(36)-H(36C)  | 109.5    |
| H(36A)-C(36)-H(36C) | 109.5    |
| H(36B)-C(36)-H(36C) | 109.5    |
| C(30)-C(37)-C(38)   | 110.9(3) |
| C(30)-C(37)-C(39)   | 112.5(3) |
| C(38)-C(37)-C(39)   | 110.5(3) |
| C(30)-C(37)-H(37)   | 107.6    |
| C(38)-C(37)-H(37)   | 107.6    |
| C(39)-C(37)-H(37)   | 107.6    |
| C(37)-C(38)-H(38A)  | 109.5    |
| C(37)-C(38)-H(38B)  | 109.5    |
| H(38A)-C(38)-H(38B) | 109.5    |
| C(37)-C(38)-H(38C)  | 109.5    |
| H(38A)-C(38)-H(38C) | 109.5    |
| H(38B)-C(38)-H(38C) | 109.5    |
| C(37)-C(39)-H(39A)  | 109.5    |
| C(37)-C(39)-H(39B)  | 109.5    |
| H(39A)-C(39)-H(39B) | 109.5    |

|                     |          |
|---------------------|----------|
| C(37)-C(39)-H(39C)  | 109.5    |
| H(39A)-C(39)-H(39C) | 109.5    |
| H(39B)-C(39)-H(39C) | 109.5    |
| F(1)-C(40)-F(3)     | 112.5(4) |
| F(3A)-C(40)-F(2A)   | 107.9(8) |
| F(1)-C(40)-F(2)     | 102.5(4) |
| F(3)-C(40)-F(2)     | 99.8(4)  |
| F(3A)-C(40)-F(1A)   | 103.9(8) |
| F(2A)-C(40)-F(1A)   | 86.7(8)  |
| F(3A)-C(40)-C(4)    | 124.7(6) |
| F(1)-C(40)-C(4)     | 116.5(3) |
| F(3)-C(40)-C(4)     | 112.7(4) |
| F(2A)-C(40)-C(4)    | 115.0(5) |
| F(2)-C(40)-C(4)     | 110.9(4) |
| F(1A)-C(40)-C(4)    | 111.6(5) |

---



Table S26. Anisotropic displacement parameters ( $\text{\AA}^2 \times 10^3$ ) for cldr10. The anisotropic displacement factor exponent takes the form:  $-2\pi^2 [h^2 a^{*2} U^{11} + \dots + 2 h k a^* b^* U^{12}]$

|       | $U^{11}$ | $U^{22}$ | $U^{33}$ | $U^{23}$ | $U^{13}$ | $U^{12}$ |
|-------|----------|----------|----------|----------|----------|----------|
| Au(1) | 23(1)    | 20(1)    | 23(1)    | -4(1)    | -1(1)    | -10(1)   |
| S(1)  | 43(1)    | 35(1)    | 32(1)    | -15(1)   | 9(1)     | -25(1)   |
| P(1)  | 18(1)    | 17(1)    | 19(1)    | -2(1)    | -4(1)    | -6(1)    |
| C(1)  | 20(1)    | 20(1)    | 37(2)    | -4(1)    | -4(1)    | -7(1)    |
| C(2)  | 55(2)    | 41(2)    | 44(2)    | -23(2)   | 16(2)    | -32(2)   |
| C(3)  | 54(2)    | 37(2)    | 58(2)    | -24(2)   | 17(2)    | -30(2)   |
| C(4)  | 34(2)    | 21(2)    | 48(2)    | 2(1)     | -2(2)    | -11(1)   |
| C(5)  | 46(2)    | 36(2)    | 29(2)    | 3(1)     | -12(2)   | -20(2)   |
| C(6)  | 40(2)    | 29(2)    | 32(2)    | 2(1)     | -15(1)   | -19(1)   |
| C(7)  | 24(1)    | 23(1)    | 20(1)    | 1(1)     | -7(1)    | -8(1)    |
| C(8)  | 39(2)    | 24(2)    | 26(2)    | 4(1)     | -11(1)   | -12(1)   |
| C(9)  | 52(2)    | 32(2)    | 28(2)    | 6(1)     | -15(2)   | -12(2)   |
| C(10) | 71(3)    | 41(2)    | 22(2)    | 5(1)     | -16(2)   | -18(2)   |
| C(11) | 64(2)    | 41(2)    | 31(2)    | -1(2)    | -20(2)   | -22(2)   |
| C(12) | 47(2)    | 28(2)    | 25(2)    | -2(1)    | -11(1)   | -15(2)   |
| C(13) | 19(1)    | 22(1)    | 23(1)    | -3(1)    | -6(1)    | -5(1)    |
| C(14) | 20(1)    | 32(2)    | 34(2)    | 0(1)     | -3(1)    | -9(1)    |
| C(15) | 21(2)    | 42(2)    | 44(2)    | -2(2)    | -4(1)    | -7(1)    |
| C(16) | 25(2)    | 39(2)    | 53(2)    | -7(2)    | -19(2)   | -1(1)    |
| C(17) | 34(2)    | 38(2)    | 37(2)    | 4(2)     | -19(2)   | -1(2)    |
| C(18) | 28(2)    | 36(2)    | 27(2)    | 3(1)     | -7(1)    | -5(1)    |
| C(19) | 22(1)    | 17(1)    | 20(1)    | 2(1)     | -9(1)    | -8(1)    |
| C(20) | 29(2)    | 21(1)    | 24(2)    | -2(1)    | -7(1)    | -8(1)    |
| C(21) | 38(2)    | 20(1)    | 28(2)    | 1(1)     | -15(1)   | -13(1)   |
| C(22) | 32(2)    | 28(2)    | 28(2)    | 5(1)     | -13(1)   | -18(1)   |
| C(23) | 24(1)    | 29(2)    | 21(1)    | 2(1)     | -7(1)    | -11(1)   |
| C(24) | 20(1)    | 17(1)    | 19(1)    | 0(1)     | -8(1)    | -6(1)    |
| C(25) | 17(1)    | 18(1)    | 19(1)    | -1(1)    | -1(1)    | -7(1)    |
| C(26) | 25(1)    | 22(1)    | 20(1)    | 1(1)     | 0(1)     | -9(1)    |
| C(27) | 37(2)    | 26(2)    | 23(2)    | -5(1)    | 0(1)     | -15(1)   |
| C(28) | 34(2)    | 18(1)    | 35(2)    | -2(1)    | 5(1)     | -11(1)   |
| C(29) | 25(2)    | 21(2)    | 39(2)    | 3(1)     | -4(1)    | -4(1)    |
| C(30) | 21(1)    | 22(1)    | 28(2)    | 1(1)     | -4(1)    | -6(1)    |
| C(31) | 38(2)    | 26(2)    | 21(2)    | -1(1)    | -11(1)   | -11(1)   |
| C(32) | 59(2)    | 36(2)    | 28(2)    | 6(1)     | -15(2)   | -26(2)   |
| C(33) | 49(2)    | 42(2)    | 33(2)    | 9(2)     | -21(2)   | -20(2)   |
| C(34) | 58(2)    | 20(2)    | 56(2)    | -9(2)    | 2(2)     | -13(2)   |
| C(35) | 96(4)    | 42(3)    | 160(6)   | -49(3)   | 76(4)    | -30(3)   |
| C(36) | 57(3)    | 26(2)    | 91(3)    | 4(2)     | -14(2)   | -18(2)   |
| C(37) | 35(2)    | 28(2)    | 51(2)    | 0(2)     | -25(2)   | -2(1)    |
| C(38) | 42(2)    | 53(3)    | 103(4)   | 6(2)     | -44(2)   | -14(2)   |
| C(39) | 72(3)    | 45(2)    | 47(2)    | 6(2)     | -34(2)   | -6(2)    |
| C(40) | 67(3)    | 33(2)    | 62(3)    | -8(2)    | 15(2)    | -29(2)   |
| F(1)  | 97(2)    | 67(1)    | 74(2)    | 2(1)     | 12(2)    | -56(2)   |

|       |       |       |       |      |       |        |
|-------|-------|-------|-------|------|-------|--------|
| F(2)  | 97(2) | 67(1) | 74(2) | 2(1) | 12(2) | -56(2) |
| F(3)  | 97(2) | 67(1) | 74(2) | 2(1) | 12(2) | -56(2) |
| F(1A) | 97(2) | 67(1) | 74(2) | 2(1) | 12(2) | -56(2) |
| F(2A) | 97(2) | 67(1) | 74(2) | 2(1) | 12(2) | -56(2) |
| F(3A) | 97(2) | 67(1) | 74(2) | 2(1) | 12(2) | -56(2) |

---

Table S27. Torsion angles [°] for cldr10.

|                         |            |
|-------------------------|------------|
| Au(1)-S(1)-C(1)-C(6)    | 5.5(3)     |
| Au(1)-S(1)-C(1)-C(2)    | -174.4(3)  |
| C(6)-C(1)-C(2)-C(3)     | 0.4(6)     |
| S(1)-C(1)-C(2)-C(3)     | -179.7(3)  |
| C(1)-C(2)-C(3)-C(4)     | 0.1(7)     |
| C(2)-C(3)-C(4)-C(5)     | -0.6(6)    |
| C(2)-C(3)-C(4)-C(40)    | 179.3(4)   |
| C(3)-C(4)-C(5)-C(6)     | 0.6(6)     |
| C(40)-C(4)-C(5)-C(6)    | -179.4(4)  |
| C(4)-C(5)-C(6)-C(1)     | -0.1(5)    |
| C(2)-C(1)-C(6)-C(5)     | -0.4(5)    |
| S(1)-C(1)-C(6)-C(5)     | 179.7(3)   |
| C(19)-P(1)-C(7)-C(8)    | 159.0(2)   |
| C(13)-P(1)-C(7)-C(8)    | -90.3(2)   |
| Au(1)-P(1)-C(7)-C(8)    | 31.5(2)    |
| C(19)-P(1)-C(7)-C(12)   | -72.7(2)   |
| C(13)-P(1)-C(7)-C(12)   | 38.1(3)    |
| Au(1)-P(1)-C(7)-C(12)   | 159.82(19) |
| C(12)-C(7)-C(8)-C(9)    | 55.2(4)    |
| P(1)-C(7)-C(8)-C(9)     | -174.0(2)  |
| C(7)-C(8)-C(9)-C(10)    | -55.4(4)   |
| C(8)-C(9)-C(10)-C(11)   | 55.0(4)    |
| C(9)-C(10)-C(11)-C(12)  | -55.5(4)   |
| C(10)-C(11)-C(12)-C(7)  | 55.4(4)    |
| C(8)-C(7)-C(12)-C(11)   | -54.8(4)   |
| P(1)-C(7)-C(12)-C(11)   | 176.2(2)   |
| C(19)-P(1)-C(13)-C(14)  | 175.8(2)   |
| C(7)-P(1)-C(13)-C(14)   | 64.9(2)    |
| Au(1)-P(1)-C(13)-C(14)  | -58.4(2)   |
| C(19)-P(1)-C(13)-C(18)  | -62.0(2)   |
| C(7)-P(1)-C(13)-C(18)   | -172.8(2)  |
| Au(1)-P(1)-C(13)-C(18)  | 63.9(2)    |
| C(18)-C(13)-C(14)-C(15) | 54.8(3)    |
| P(1)-C(13)-C(14)-C(15)  | 176.0(2)   |
| C(13)-C(14)-C(15)-C(16) | -55.2(4)   |
| C(14)-C(15)-C(16)-C(17) | 55.4(4)    |
| C(15)-C(16)-C(17)-C(18) | -55.3(4)   |
| C(16)-C(17)-C(18)-C(13) | 55.5(4)    |
| C(14)-C(13)-C(18)-C(17) | -55.4(3)   |
| P(1)-C(13)-C(18)-C(17)  | -178.1(2)  |
| C(13)-P(1)-C(19)-C(20)  | -39.0(3)   |
| C(7)-P(1)-C(19)-C(20)   | 75.8(2)    |
| Au(1)-P(1)-C(19)-C(20)  | -159.9(2)  |
| C(13)-P(1)-C(19)-C(24)  | 141.6(2)   |
| C(7)-P(1)-C(19)-C(24)   | -103.5(2)  |
| Au(1)-P(1)-C(19)-C(24)  | 20.8(3)    |
| C(24)-C(19)-C(20)-C(21) | 1.0(4)     |

|                         |           |
|-------------------------|-----------|
| P(1)-C(19)-C(20)-C(21)  | -178.4(2) |
| C(19)-C(20)-C(21)-C(22) | -0.1(5)   |
| C(20)-C(21)-C(22)-C(23) | -0.3(5)   |
| C(21)-C(22)-C(23)-C(24) | -0.2(5)   |
| C(22)-C(23)-C(24)-C(19) | 1.1(4)    |
| C(22)-C(23)-C(24)-C(25) | -179.3(3) |
| C(20)-C(19)-C(24)-C(23) | -1.4(4)   |
| P(1)-C(19)-C(24)-C(23)  | 177.9(2)  |
| C(20)-C(19)-C(24)-C(25) | 179.0(3)  |
| P(1)-C(19)-C(24)-C(25)  | -1.6(4)   |
| C(23)-C(24)-C(25)-C(30) | -87.0(3)  |
| C(19)-C(24)-C(25)-C(30) | 92.5(3)   |
| C(23)-C(24)-C(25)-C(26) | 89.0(3)   |
| C(19)-C(24)-C(25)-C(26) | -91.4(3)  |
| C(30)-C(25)-C(26)-C(27) | -0.7(4)   |
| C(24)-C(25)-C(26)-C(27) | -176.7(2) |
| C(30)-C(25)-C(26)-C(31) | 178.3(3)  |
| C(24)-C(25)-C(26)-C(31) | 2.3(4)    |
| C(25)-C(26)-C(27)-C(28) | -0.2(4)   |
| C(31)-C(26)-C(27)-C(28) | -179.2(3) |
| C(26)-C(27)-C(28)-C(29) | 0.8(4)    |
| C(26)-C(27)-C(28)-C(34) | -178.5(3) |
| C(27)-C(28)-C(29)-C(30) | -0.6(5)   |
| C(34)-C(28)-C(29)-C(30) | 178.7(3)  |
| C(28)-C(29)-C(30)-C(25) | -0.3(4)   |
| C(28)-C(29)-C(30)-C(37) | 178.2(3)  |
| C(26)-C(25)-C(30)-C(29) | 0.9(4)    |
| C(24)-C(25)-C(30)-C(29) | 176.9(2)  |
| C(26)-C(25)-C(30)-C(37) | -177.5(3) |
| C(24)-C(25)-C(30)-C(37) | -1.5(4)   |
| C(27)-C(26)-C(31)-C(32) | 87.3(3)   |
| C(25)-C(26)-C(31)-C(32) | -91.7(3)  |
| C(27)-C(26)-C(31)-C(33) | -37.2(4)  |
| C(25)-C(26)-C(31)-C(33) | 143.8(3)  |
| C(29)-C(28)-C(34)-C(36) | -57.3(5)  |
| C(27)-C(28)-C(34)-C(36) | 121.9(4)  |
| C(29)-C(28)-C(34)-C(35) | 63.1(5)   |
| C(27)-C(28)-C(34)-C(35) | -117.7(5) |
| C(29)-C(30)-C(37)-C(38) | -78.3(4)  |
| C(25)-C(30)-C(37)-C(38) | 100.1(4)  |
| C(29)-C(30)-C(37)-C(39) | 46.0(4)   |
| C(25)-C(30)-C(37)-C(39) | -135.6(3) |
| C(5)-C(4)-C(40)-F(3A)   | 155.4(10) |
| C(3)-C(4)-C(40)-F(3A)   | -24.6(11) |
| C(5)-C(4)-C(40)-F(1)    | -14.1(7)  |
| C(3)-C(4)-C(40)-F(1)    | 166.0(5)  |
| C(5)-C(4)-C(40)-F(3)    | 118.2(5)  |
| C(3)-C(4)-C(40)-F(3)    | -61.8(6)  |
| C(5)-C(4)-C(40)-F(2A)   | -67.3(8)  |

|                       |           |
|-----------------------|-----------|
| C(3)-C(4)-C(40)-F(2A) | 112.8(8)  |
| C(5)-C(4)-C(40)-F(2)  | -130.8(4) |
| C(3)-C(4)-C(40)-F(2)  | 49.2(5)   |
| C(5)-C(4)-C(40)-F(1A) | 29.4(8)   |
| C(3)-C(4)-C(40)-F(1A) | -150.6(7) |

---

## Compound 7.

Table S28. Crystal data and structure refinement for cldr08b.

|                                   |                                             |                              |
|-----------------------------------|---------------------------------------------|------------------------------|
| Identification code               | cldr08b                                     |                              |
| Empirical formula                 | C78 H103 Au2 F4 P2 S2                       |                              |
| Formula weight                    | 1636.59                                     |                              |
| Temperature                       | 130(2) K                                    |                              |
| Wavelength                        | 1.54184 Å                                   |                              |
| Crystal system                    | Triclinic                                   |                              |
| Space group                       | P -1                                        |                              |
| Unit cell dimensions              | a = 10.1282(5) Å                            | $\alpha = 85.780(4)^\circ$ . |
|                                   | b = 17.4731(7) Å                            | $\beta = 82.939(4)^\circ$ .  |
|                                   | c = 20.6629(10) Å                           | $\gamma = 89.929(4)^\circ$ . |
| Volume                            | 3619.1(3) Å <sup>3</sup>                    |                              |
| Z                                 | 2                                           |                              |
| Density (calculated)              | 1.502 Mg/m <sup>3</sup>                     |                              |
| Absorption coefficient            | 8.874 mm <sup>-1</sup>                      |                              |
| F(000)                            | 1654                                        |                              |
| Crystal size                      | 0.420 x 0.120 x 0.080 mm <sup>3</sup>       |                              |
| Theta range for data collection   | 3.452 to 73.917°.                           |                              |
| Index ranges                      | -12<=h<=12, -19<=k<=21, -25<=l<=25          |                              |
| Reflections collected             | 80882                                       |                              |
| Independent reflections           | 14388 [R(int) = 0.0883]                     |                              |
| Completeness to theta = 67.684°   | 99.9 %                                      |                              |
| Absorption correction             | Analytical                                  |                              |
| Max. and min. transmission        | 0.529 and 0.155                             |                              |
| Refinement method                 | Full-matrix least-squares on F <sup>2</sup> |                              |
| Data / restraints / parameters    | 14388 / 140 / 765                           |                              |
| Goodness-of-fit on F <sup>2</sup> | 1.058                                       |                              |
| Final R indices [I>2sigma(I)]     | R1 = 0.0703, wR2 = 0.1477                   |                              |
| R indices (all data)              | R1 = 0.1001, wR2 = 0.1639                   |                              |
| Extinction coefficient            | n/a                                         |                              |
| Largest diff. peak and hole       | 5.273 and -4.715 e.Å <sup>-3</sup>          |                              |

Table S29. Atomic coordinates ( $\times 10^4$ ) and equivalent isotropic displacement parameters ( $\text{\AA}^2 \times 10^3$ ) for cldr08b.  $U(\text{eq})$  is defined as one third of the trace of the orthogonalized  $U^{ij}$  tensor.

|       | x         | y        | z       | $U(\text{eq})$ |
|-------|-----------|----------|---------|----------------|
| Au(1) | 6480(1)   | 2169(1)  | 2851(1) | 33(1)          |
| S(1)  | 7939(3)   | 3200(2)  | 2774(1) | 48(1)          |
| P(1)  | 5094(2)   | 1152(1)  | 2866(1) | 26(1)          |
| F(1)  | 9855(14)  | 4296(9)  | 3106(6) | 155(4)         |
| F(2)  | 8695(14)  | 4259(8)  | 5337(6) | 155(4)         |
| C(1)  | 8079(12)  | 3488(7)  | 3544(6) | 51(3)          |
| C(2)  | 9072(15)  | 4018(9)  | 3641(8) | 71(4)          |
| C(3)  | 9250(20)  | 4291(13) | 4221(9) | 119(5)         |
| C(4)  | 8510(20)  | 4017(13) | 4737(9) | 119(5)         |
| C(5)  | 7370(20)  | 3552(12) | 4703(9) | 119(5)         |
| C(6)  | 7210(20)  | 3278(10) | 4097(7) | 96(6)          |
| C(7)  | 5750(11)  | 262(6)   | 3272(5) | 42(3)          |
| C(8)  | 6222(17)  | 432(7)   | 3928(7) | 70(4)          |
| C(9)  | 6850(20)  | -285(9)  | 4229(9) | 120(9)         |
| C(10) | 6150(20)  | -960(9)  | 4243(7) | 90(6)          |
| C(11) | 5790(20)  | -1115(8) | 3576(7) | 88(6)          |
| C(12) | 4971(15)  | -432(7)  | 3325(7) | 65(4)          |
| C(13) | 3402(11)  | 1304(8)  | 3282(6) | 51(2)          |
| C(14) | 3408(12)  | 1627(10) | 3944(5) | 67(4)          |
| C(15) | 2003(13)  | 1723(10) | 4284(6) | 71(4)          |
| C(16) | 1165(12)  | 2222(9)  | 3874(6) | 63(4)          |
| C(17) | 1183(11)  | 1932(7)  | 3197(6) | 51(2)          |
| C(18) | 2563(13)  | 1867(9)  | 2868(5) | 61(4)          |
| C(19) | 4802(9)   | 848(5)   | 2054(4) | 25(2)          |
| C(20) | 3715(9)   | 357(6)   | 2024(5) | 33(2)          |
| C(21) | 3406(9)   | 124(6)   | 1442(5) | 37(2)          |
| C(22) | 4163(10)  | 374(6)   | 867(5)  | 37(2)          |
| C(23) | 5249(9)   | 861(6)   | 890(5)  | 33(2)          |
| C(24) | 5579(8)   | 1101(5)  | 1474(4) | 23(2)          |
| C(25) | 6794(8)   | 1635(5)  | 1424(4) | 22(2)          |
| C(26) | 8072(9)   | 1318(5)  | 1452(4) | 27(2)          |
| C(27) | 9162(8)   | 1816(5)  | 1369(4) | 26(2)          |
| C(28) | 9031(9)   | 2598(5)  | 1247(4) | 27(2)          |
| C(29) | 7764(8)   | 2894(5)  | 1213(4) | 27(2)          |
| C(30) | 6638(9)   | 2422(5)  | 1297(4) | 27(2)          |
| C(31) | 8294(10)  | 456(5)   | 1553(5) | 35(2)          |
| C(32) | 8795(14)  | 136(7)   | 914(7)  | 61(4)          |
| C(33) | 9212(12)  | 269(7)   | 2076(7) | 59(4)          |
| C(34) | 10204(10) | 3151(6)  | 1166(5) | 36(2)          |
| C(35) | 11515(10) | 2795(8)  | 1308(7) | 57(3)          |
| C(36) | 10396(11) | 3581(8)  | 487(6)  | 56(3)          |
| C(37) | 5280(8)   | 2788(5)  | 1234(4) | 26(2)          |
| C(38) | 5045(11)  | 3502(6)  | 1635(5) | 42(3)          |
| C(39) | 5163(11)  | 3004(7)  | 513(5)  | 47(3)          |

|        |          |           |          |        |
|--------|----------|-----------|----------|--------|
| Au(2)  | 4186(1)  | -2883(1)  | 2844(1)  | 43(1)  |
| S(2)   | 2708(4)  | -1880(2)  | 2763(2)  | 60(1)  |
| P(2)   | 5692(2)  | -3838(1)  | 2889(1)  | 29(1)  |
| F(1B)  | 1015(8)  | -587(5)   | 3095(4)  | 80(2)  |
| F(2B)  | 938(8)   | -810(5)   | 5360(4)  | 83(3)  |
| C(1B)  | 2219(13) | -1595(7)  | 3545(6)  | 55(3)  |
| C(2B)  | 1385(10) | -964(7)   | 3628(6)  | 48(3)  |
| C(3B)  | 977(13)  | -684(8)   | 4220(7)  | 60(3)  |
| C(4B)  | 1340(13) | -1063(8)  | 4756(7)  | 61(4)  |
| C(5B)  | 2134(16) | -1711(10) | 4740(7)  | 81(5)  |
| C(6B)  | 2552(17) | -1962(9)  | 4131(7)  | 79(5)  |
| C(7B)  | 7103(10) | -3562(7)  | 3317(5)  | 46(2)  |
| C(13B) | 5035(12) | -4734(7)  | 3345(5)  | 56(3)  |
| C(19B) | 6427(9)  | -4145(5)  | 2098(4)  | 27(2)  |
| C(20B) | 7487(9)  | -4661(5)  | 2104(5)  | 31(2)  |
| C(21B) | 8139(9)  | -4924(6)  | 1538(5)  | 35(2)  |
| C(22B) | 7760(9)  | -4664(6)  | 943(5)   | 35(2)  |
| C(23B) | 6710(9)  | -4158(5)  | 924(5)   | 32(2)  |
| C(24B) | 6023(8)  | -3891(5)  | 1496(4)  | 24(2)  |
| C(25B) | 4860(9)  | -3363(5)  | 1406(4)  | 25(2)  |
| C(26B) | 3605(8)  | -3676(5)  | 1359(4)  | 26(2)  |
| C(27B) | 2555(9)  | -3175(6)  | 1244(4)  | 29(2)  |
| C(28B) | 2723(9)  | -2389(5)  | 1167(4)  | 27(2)  |
| C(29B) | 3996(9)  | -2091(5)  | 1185(4)  | 27(2)  |
| C(30B) | 5067(9)  | -2561(5)  | 1303(4)  | 25(2)  |
| C(31B) | 3338(9)  | -4543(6)  | 1397(5)  | 37(2)  |
| C(32B) | 2018(10) | -4776(7)  | 1792(7)  | 52(3)  |
| C(33B) | 3392(12) | -4815(7)  | 705(6)   | 52(3)  |
| C(34B) | 1559(10) | -1877(6)  | 1053(5)  | 39(2)  |
| C(35B) | 1277(15) | -1849(12) | 354(6)   | 105(7) |
| C(36B) | 304(14)  | -2089(11) | 1483(7)  | 91(6)  |
| C(37B) | 6425(9)  | -2194(5)  | 1309(5)  | 30(2)  |
| C(38B) | 7062(11) | -2002(7)  | 605(5)   | 47(3)  |
| C(39B) | 6400(11) | -1482(6)  | 1685(6)  | 46(3)  |
| C(8B)  | 7830(30) | -2875(15) | 2933(13) | 46(2)  |
| C(9B)  | 8760(30) | -2477(16) | 3331(13) | 46(2)  |
| C(10B) | 9570(30) | -3060(15) | 3690(15) | 46(2)  |
| C(11B) | 8720(30) | -3696(16) | 4078(12) | 46(2)  |
| C(12B) | 7900(20) | -4155(11) | 3665(12) | 46(2)  |
| C(14B) | 4370(20) | -4616(10) | 4021(7)  | 83(4)  |
| C(15B) | 3960(20) | -5382(11) | 4387(8)  | 83(4)  |
| C(16B) | 3020(20) | -5832(12) | 4035(7)  | 83(4)  |
| C(17B) | 3680(20) | -5940(12) | 3359(8)  | 83(4)  |
| C(18B) | 4110(40) | -5175(13) | 2993(13) | 83(4)  |
| C(8P)  | 8210(20) | -3078(18) | 2915(12) | 89(5)  |
| C(9P)  | 9430(20) | -2922(18) | 3242(10) | 89(5)  |
| C(10P) | 9020(30) | -2657(17) | 3925(10) | 89(5)  |
| C(11P) | 7960(20) | -3153(17) | 4336(10) | 89(5)  |
| C(12P) | 6730(20) | -3271(16) | 3983(8)  | 89(5)  |



|        |           |           |          |       |
|--------|-----------|-----------|----------|-------|
| C(14P) | 3940(50)  | -4470(30) | 3850(30) | 83(4) |
| C(15P) | 3100(70)  | -5180(30) | 4120(30) | 83(4) |
| C(16P) | 3880(80)  | -5920(40) | 4220(20) | 83(4) |
| C(17P) | 4180(80)  | -5990(40) | 3490(20) | 83(4) |
| C(18P) | 4320(140) | -5300(40) | 2990(40) | 83(4) |

---

Table S30. Bond lengths [Å] and angles [°] for cldr08b.

|              |           |
|--------------|-----------|
| Au(1)-P(1)   | 2.262(2)  |
| Au(1)-S(1)   | 2.316(3)  |
| S(1)-C(1)    | 1.725(12) |
| P(1)-C(13)   | 1.848(11) |
| P(1)-C(19)   | 1.853(9)  |
| P(1)-C(7)    | 1.871(11) |
| F(1)-C(2)    | 1.339(19) |
| F(2)-C(4)    | 1.374(18) |
| C(1)-C(6)    | 1.38(2)   |
| C(1)-C(2)    | 1.410(18) |
| C(2)-C(3)    | 1.35(2)   |
| C(3)-C(4)    | 1.29(3)   |
| C(3)-H(3)    | 0.9500    |
| C(4)-C(5)    | 1.42(3)   |
| C(5)-C(6)    | 1.40(2)   |
| C(5)-H(5)    | 0.9500    |
| C(6)-H(6)    | 0.9500    |
| C(7)-C(12)   | 1.438(17) |
| C(7)-C(8)    | 1.541(15) |
| C(7)-H(7)    | 1.0000    |
| C(8)-C(9)    | 1.530(19) |
| C(8)-H(8A)   | 0.9900    |
| C(8)-H(8B)   | 0.9900    |
| C(9)-C(10)   | 1.38(2)   |
| C(9)-H(9A)   | 0.9900    |
| C(9)-H(9B)   | 0.9900    |
| C(10)-C(11)  | 1.511(18) |
| C(10)-H(10E) | 0.9900    |
| C(10)-H(10F) | 0.9900    |
| C(11)-C(12)  | 1.550(18) |
| C(11)-H(11E) | 0.9900    |
| C(11)-H(11F) | 0.9900    |
| C(12)-H(12E) | 0.9900    |
| C(12)-H(12F) | 0.9900    |
| C(13)-C(14)  | 1.519(16) |
| C(13)-C(18)  | 1.573(16) |
| C(13)-H(13)  | 1.0000    |
| C(14)-C(15)  | 1.523(16) |
| C(14)-H(14E) | 0.9900    |
| C(14)-H(14F) | 0.9900    |
| C(15)-C(16)  | 1.504(19) |
| C(15)-H(15E) | 0.9900    |
| C(15)-H(15F) | 0.9900    |
| C(16)-C(17)  | 1.521(17) |
| C(16)-H(16E) | 0.9900    |
| C(16)-H(16F) | 0.9900    |
| C(17)-C(18)  | 1.486(16) |

|              |           |
|--------------|-----------|
| C(17)-H(17E) | 0.9900    |
| C(17)-H(17F) | 0.9900    |
| C(18)-H(18E) | 0.9900    |
| C(18)-H(18F) | 0.9900    |
| C(19)-C(24)  | 1.394(12) |
| C(19)-C(20)  | 1.408(12) |
| C(20)-C(21)  | 1.369(14) |
| C(20)-H(20)  | 0.9500    |
| C(21)-C(22)  | 1.376(14) |
| C(21)-H(21)  | 0.9500    |
| C(22)-C(23)  | 1.398(13) |
| C(22)-H(22)  | 0.9500    |
| C(23)-C(24)  | 1.385(12) |
| C(23)-H(23)  | 0.9500    |
| C(24)-C(25)  | 1.534(12) |
| C(25)-C(30)  | 1.393(13) |
| C(25)-C(26)  | 1.413(12) |
| C(26)-C(27)  | 1.393(12) |
| C(26)-C(31)  | 1.526(13) |
| C(27)-C(28)  | 1.380(13) |
| C(27)-H(27)  | 0.9500    |
| C(28)-C(29)  | 1.391(12) |
| C(28)-C(34)  | 1.517(13) |
| C(29)-C(30)  | 1.393(12) |
| C(29)-H(29)  | 0.9500    |
| C(30)-C(37)  | 1.532(12) |
| C(31)-C(32)  | 1.502(15) |
| C(31)-C(33)  | 1.527(14) |
| C(31)-H(31)  | 1.0000    |
| C(32)-H(32D) | 0.9800    |
| C(32)-H(32E) | 0.9800    |
| C(32)-H(32F) | 0.9800    |
| C(33)-H(33D) | 0.9800    |
| C(33)-H(33E) | 0.9800    |
| C(33)-H(33F) | 0.9800    |
| C(34)-C(35)  | 1.517(15) |
| C(34)-C(36)  | 1.533(15) |
| C(34)-H(34)  | 1.0000    |
| C(35)-H(35D) | 0.9800    |
| C(35)-H(35E) | 0.9800    |
| C(35)-H(35F) | 0.9800    |
| C(36)-H(36D) | 0.9800    |
| C(36)-H(36E) | 0.9800    |
| C(36)-H(36F) | 0.9800    |
| C(37)-C(39)  | 1.528(13) |
| C(37)-C(38)  | 1.550(13) |
| C(37)-H(37)  | 1.0000    |
| C(38)-H(38D) | 0.9800    |
| C(38)-H(38E) | 0.9800    |

|               |           |
|---------------|-----------|
| C(38)-H(38F)  | 0.9800    |
| C(39)-H(39D)  | 0.9800    |
| C(39)-H(39E)  | 0.9800    |
| C(39)-H(39F)  | 0.9800    |
| Au(2)-P(2)    | 2.264(2)  |
| Au(2)-S(2)    | 2.313(3)  |
| S(2)-C(1B)    | 1.738(12) |
| P(2)-C(19B)   | 1.829(9)  |
| P(2)-C(13B)   | 1.848(11) |
| P(2)-C(7B)    | 1.853(10) |
| F(1B)-C(2B)   | 1.335(14) |
| F(2B)-C(4B)   | 1.368(14) |
| C(1B)-C(2B)   | 1.395(16) |
| C(1B)-C(6B)   | 1.406(18) |
| C(2B)-C(3B)   | 1.367(17) |
| C(3B)-C(4B)   | 1.340(19) |
| C(3B)-H(3B)   | 0.9500    |
| C(4B)-C(5B)   | 1.39(2)   |
| C(5B)-C(6B)   | 1.380(17) |
| C(5B)-H(5B)   | 0.9500    |
| C(6B)-H(6B)   | 0.9500    |
| C(7B)-C(12P)  | 1.505(13) |
| C(7B)-C(12B)  | 1.510(8)  |
| C(7B)-C(8B)   | 1.526(12) |
| C(7B)-C(8P)   | 1.526(16) |
| C(13B)-C(14B) | 1.502(11) |
| C(13B)-C(18B) | 1.502(11) |
| C(13B)-C(18P) | 1.51(2)   |
| C(13B)-C(14P) | 1.52(2)   |
| C(13B)-H(13B) | 1.0001    |
| C(19B)-C(24B) | 1.398(12) |
| C(19B)-C(20B) | 1.401(12) |
| C(20B)-C(21B) | 1.379(13) |
| C(20B)-H(20B) | 0.9500    |
| C(21B)-C(22B) | 1.379(13) |
| C(21B)-H(21B) | 0.9500    |
| C(22B)-C(23B) | 1.384(13) |
| C(22B)-H(22B) | 0.9500    |
| C(23B)-C(24B) | 1.406(12) |
| C(23B)-H(23B) | 0.9500    |
| C(24B)-C(25B) | 1.517(12) |
| C(25B)-C(26B) | 1.402(12) |
| C(25B)-C(30B) | 1.413(12) |
| C(26B)-C(27B) | 1.409(12) |
| C(26B)-C(31B) | 1.534(13) |
| C(27B)-C(28B) | 1.380(13) |
| C(27B)-H(27B) | 0.9500    |
| C(28B)-C(29B) | 1.397(12) |
| C(28B)-C(34B) | 1.509(13) |

|               |           |
|---------------|-----------|
| C(29B)-C(30B) | 1.393(12) |
| C(29B)-H(29B) | 0.9500    |
| C(30B)-C(37B) | 1.521(12) |
| C(31B)-C(32B) | 1.518(14) |
| C(31B)-C(33B) | 1.535(15) |
| C(31B)-H(31B) | 1.0000    |
| C(32B)-H(32A) | 0.9800    |
| C(32B)-H(32B) | 0.9800    |
| C(32B)-H(32C) | 0.9800    |
| C(33B)-H(33A) | 0.9800    |
| C(33B)-H(33B) | 0.9800    |
| C(33B)-H(33C) | 0.9800    |
| C(34B)-C(36B) | 1.489(17) |
| C(34B)-C(35B) | 1.504(17) |
| C(34B)-H(34B) | 1.0000    |
| C(35B)-H(35A) | 0.9800    |
| C(35B)-H(35B) | 0.9800    |
| C(35B)-H(35C) | 0.9800    |
| C(36B)-H(36A) | 0.9800    |
| C(36B)-H(36B) | 0.9800    |
| C(36B)-H(36C) | 0.9800    |
| C(37B)-C(39B) | 1.513(14) |
| C(37B)-C(38B) | 1.530(14) |
| C(37B)-H(37B) | 1.0000    |
| C(38B)-H(38A) | 0.9800    |
| C(38B)-H(38B) | 0.9800    |
| C(38B)-H(38C) | 0.9800    |
| C(39B)-H(39A) | 0.9800    |
| C(39B)-H(39B) | 0.9800    |
| C(39B)-H(39C) | 0.9800    |
| C(8B)-C(9B)   | 1.522(13) |
| C(8B)-H(8BA)  | 0.9697    |
| C(8B)-H(8BB)  | 0.9701    |
| C(9B)-C(10B)  | 1.517(13) |
| C(9B)-H(9BA)  | 0.9900    |
| C(9B)-H(9BB)  | 0.9900    |
| C(10B)-C(11B) | 1.522(12) |
| C(10B)-H(10A) | 0.9900    |
| C(10B)-H(10B) | 0.9900    |
| C(11B)-C(12B) | 1.527(12) |
| C(11B)-H(11A) | 0.9900    |
| C(11B)-H(11B) | 0.9900    |
| C(12B)-H(12A) | 0.9702    |
| C(12B)-H(12B) | 0.9696    |
| C(14B)-C(15B) | 1.521(11) |
| C(14B)-H(14A) | 0.9701    |
| C(14B)-H(14B) | 0.9701    |
| C(15B)-C(16B) | 1.517(12) |
| C(15B)-H(15A) | 0.9900    |

|                  |           |
|------------------|-----------|
| C(15B)-H(15B)    | 0.9900    |
| C(16B)-C(17B)    | 1.497(12) |
| C(16B)-H(16A)    | 0.9900    |
| C(16B)-H(16B)    | 0.9900    |
| C(17B)-C(18B)    | 1.523(12) |
| C(17B)-H(17A)    | 0.9900    |
| C(17B)-H(17B)    | 0.9900    |
| C(18B)-H(18A)    | 0.9703    |
| C(18B)-H(18B)    | 0.9699    |
| C(8P)-C(9P)      | 1.513(13) |
| C(8P)-H(8PA)     | 0.9900    |
| C(8P)-H(8PB)     | 0.9900    |
| C(9P)-C(10P)     | 1.525(18) |
| C(9P)-H(9PA)     | 0.9900    |
| C(9P)-H(9PB)     | 0.9900    |
| C(10P)-C(11P)    | 1.516(13) |
| C(10P)-H(10C)    | 0.9900    |
| C(10P)-H(10D)    | 0.9900    |
| C(11P)-C(12P)    | 1.540(17) |
| C(11P)-H(11C)    | 0.9900    |
| C(11P)-H(11D)    | 0.9900    |
| C(12P)-H(12C)    | 0.9697    |
| C(12P)-H(12D)    | 0.9702    |
| C(14P)-C(15P)    | 1.53(2)   |
| C(14P)-H(14C)    | 0.9699    |
| C(14P)-H(14D)    | 0.9698    |
| C(15P)-C(16P)    | 1.53(2)   |
| C(15P)-H(15C)    | 0.9900    |
| C(15P)-H(15D)    | 0.9900    |
| C(16P)-C(17P)    | 1.51(2)   |
| C(16P)-H(16C)    | 0.9900    |
| C(16P)-H(16D)    | 0.9900    |
| C(17P)-C(18P)    | 1.53(2)   |
| C(17P)-H(17C)    | 0.9900    |
| C(17P)-H(17D)    | 0.9900    |
| C(18P)-H(18C)    | 0.9699    |
| C(18P)-H(18D)    | 0.9702    |
|                  |           |
| P(1)-Au(1)-S(1)  | 176.77(9) |
| C(1)-S(1)-Au(1)  | 109.8(4)  |
| C(13)-P(1)-C(19) | 103.8(5)  |
| C(13)-P(1)-C(7)  | 107.1(6)  |
| C(19)-P(1)-C(7)  | 103.1(4)  |
| C(13)-P(1)-Au(1) | 113.9(4)  |
| C(19)-P(1)-Au(1) | 115.6(3)  |
| C(7)-P(1)-Au(1)  | 112.2(3)  |
| C(6)-C(1)-C(2)   | 114.4(13) |
| C(6)-C(1)-S(1)   | 124.8(11) |
| C(2)-C(1)-S(1)   | 120.7(11) |

|                     |           |
|---------------------|-----------|
| F(1)-C(2)-C(3)      | 118.1(16) |
| F(1)-C(2)-C(1)      | 116.6(13) |
| C(3)-C(2)-C(1)      | 125.3(17) |
| C(4)-C(3)-C(2)      | 118.2(19) |
| C(4)-C(3)-H(3)      | 120.9     |
| C(2)-C(3)-H(3)      | 120.9     |
| C(3)-C(4)-F(2)      | 119.7(18) |
| C(3)-C(4)-C(5)      | 122.1(17) |
| F(2)-C(4)-C(5)      | 117.6(19) |
| C(6)-C(5)-C(4)      | 117.4(19) |
| C(6)-C(5)-H(5)      | 121.3     |
| C(4)-C(5)-H(5)      | 121.3     |
| C(1)-C(6)-C(5)      | 121.6(17) |
| C(1)-C(6)-H(6)      | 119.2     |
| C(5)-C(6)-H(6)      | 119.2     |
| C(12)-C(7)-C(8)     | 112.1(10) |
| C(12)-C(7)-P(1)     | 118.8(8)  |
| C(8)-C(7)-P(1)      | 110.7(8)  |
| C(12)-C(7)-H(7)     | 104.6     |
| C(8)-C(7)-H(7)      | 104.6     |
| P(1)-C(7)-H(7)      | 104.6     |
| C(9)-C(8)-C(7)      | 110.1(11) |
| C(9)-C(8)-H(8A)     | 109.6     |
| C(7)-C(8)-H(8A)     | 109.6     |
| C(9)-C(8)-H(8B)     | 109.6     |
| C(7)-C(8)-H(8B)     | 109.6     |
| H(8A)-C(8)-H(8B)    | 108.2     |
| C(10)-C(9)-C(8)     | 116.3(14) |
| C(10)-C(9)-H(9A)    | 108.2     |
| C(8)-C(9)-H(9A)     | 108.2     |
| C(10)-C(9)-H(9B)    | 108.2     |
| C(8)-C(9)-H(9B)     | 108.2     |
| H(9A)-C(9)-H(9B)    | 107.4     |
| C(9)-C(10)-C(11)    | 111.9(14) |
| C(9)-C(10)-H(10E)   | 109.2     |
| C(11)-C(10)-H(10E)  | 109.2     |
| C(9)-C(10)-H(10F)   | 109.2     |
| C(11)-C(10)-H(10F)  | 109.2     |
| H(10E)-C(10)-H(10F) | 107.9     |
| C(10)-C(11)-C(12)   | 108.6(12) |
| C(10)-C(11)-H(11E)  | 110.0     |
| C(12)-C(11)-H(11E)  | 110.0     |
| C(10)-C(11)-H(11F)  | 110.0     |
| C(12)-C(11)-H(11F)  | 110.0     |
| H(11E)-C(11)-H(11F) | 108.4     |
| C(7)-C(12)-C(11)    | 109.8(12) |
| C(7)-C(12)-H(12E)   | 109.7     |
| C(11)-C(12)-H(12E)  | 109.7     |
| C(7)-C(12)-H(12F)   | 109.7     |

|                     |           |
|---------------------|-----------|
| C(11)-C(12)-H(12F)  | 109.7     |
| H(12E)-C(12)-H(12F) | 108.2     |
| C(14)-C(13)-C(18)   | 107.1(10) |
| C(14)-C(13)-P(1)    | 112.8(8)  |
| C(18)-C(13)-P(1)    | 112.6(9)  |
| C(14)-C(13)-H(13)   | 108.1     |
| C(18)-C(13)-H(13)   | 108.1     |
| P(1)-C(13)-H(13)    | 108.1     |
| C(13)-C(14)-C(15)   | 111.6(11) |
| C(13)-C(14)-H(14E)  | 109.3     |
| C(15)-C(14)-H(14E)  | 109.3     |
| C(13)-C(14)-H(14F)  | 109.3     |
| C(15)-C(14)-H(14F)  | 109.3     |
| H(14E)-C(14)-H(14F) | 108.0     |
| C(16)-C(15)-C(14)   | 112.3(11) |
| C(16)-C(15)-H(15E)  | 109.2     |
| C(14)-C(15)-H(15E)  | 109.2     |
| C(16)-C(15)-H(15F)  | 109.2     |
| C(14)-C(15)-H(15F)  | 109.2     |
| H(15E)-C(15)-H(15F) | 107.9     |
| C(15)-C(16)-C(17)   | 110.9(11) |
| C(15)-C(16)-H(16E)  | 109.5     |
| C(17)-C(16)-H(16E)  | 109.5     |
| C(15)-C(16)-H(16F)  | 109.5     |
| C(17)-C(16)-H(16F)  | 109.5     |
| H(16E)-C(16)-H(16F) | 108.0     |
| C(18)-C(17)-C(16)   | 111.5(10) |
| C(18)-C(17)-H(17E)  | 109.3     |
| C(16)-C(17)-H(17E)  | 109.3     |
| C(18)-C(17)-H(17F)  | 109.3     |
| C(16)-C(17)-H(17F)  | 109.3     |
| H(17E)-C(17)-H(17F) | 108.0     |
| C(17)-C(18)-C(13)   | 110.9(10) |
| C(17)-C(18)-H(18E)  | 109.5     |
| C(13)-C(18)-H(18E)  | 109.5     |
| C(17)-C(18)-H(18F)  | 109.5     |
| C(13)-C(18)-H(18F)  | 109.5     |
| H(18E)-C(18)-H(18F) | 108.0     |
| C(24)-C(19)-C(20)   | 118.7(8)  |
| C(24)-C(19)-P(1)    | 123.3(7)  |
| C(20)-C(19)-P(1)    | 118.0(7)  |
| C(21)-C(20)-C(19)   | 121.6(9)  |
| C(21)-C(20)-H(20)   | 119.2     |
| C(19)-C(20)-H(20)   | 119.2     |
| C(20)-C(21)-C(22)   | 120.0(9)  |
| C(20)-C(21)-H(21)   | 120.0     |
| C(22)-C(21)-H(21)   | 120.0     |
| C(21)-C(22)-C(23)   | 118.9(9)  |
| C(21)-C(22)-H(22)   | 120.5     |



|                     |           |
|---------------------|-----------|
| C(23)-C(22)-H(22)   | 120.5     |
| C(24)-C(23)-C(22)   | 121.9(9)  |
| C(24)-C(23)-H(23)   | 119.0     |
| C(22)-C(23)-H(23)   | 119.0     |
| C(23)-C(24)-C(19)   | 118.8(8)  |
| C(23)-C(24)-C(25)   | 116.2(8)  |
| C(19)-C(24)-C(25)   | 125.1(8)  |
| C(30)-C(25)-C(26)   | 120.7(8)  |
| C(30)-C(25)-C(24)   | 119.5(7)  |
| C(26)-C(25)-C(24)   | 119.6(8)  |
| C(27)-C(26)-C(25)   | 118.2(8)  |
| C(27)-C(26)-C(31)   | 119.4(8)  |
| C(25)-C(26)-C(31)   | 122.4(8)  |
| C(28)-C(27)-C(26)   | 122.1(8)  |
| C(28)-C(27)-H(27)   | 118.9     |
| C(26)-C(27)-H(27)   | 118.9     |
| C(27)-C(28)-C(29)   | 118.5(8)  |
| C(27)-C(28)-C(34)   | 122.8(8)  |
| C(29)-C(28)-C(34)   | 118.6(8)  |
| C(28)-C(29)-C(30)   | 121.7(9)  |
| C(28)-C(29)-H(29)   | 119.1     |
| C(30)-C(29)-H(29)   | 119.1     |
| C(25)-C(30)-C(29)   | 118.8(8)  |
| C(25)-C(30)-C(37)   | 122.6(8)  |
| C(29)-C(30)-C(37)   | 118.6(8)  |
| C(32)-C(31)-C(26)   | 110.2(9)  |
| C(32)-C(31)-C(33)   | 112.2(10) |
| C(26)-C(31)-C(33)   | 111.5(9)  |
| C(32)-C(31)-H(31)   | 107.5     |
| C(26)-C(31)-H(31)   | 107.5     |
| C(33)-C(31)-H(31)   | 107.5     |
| C(31)-C(32)-H(32D)  | 109.5     |
| C(31)-C(32)-H(32E)  | 109.5     |
| H(32D)-C(32)-H(32E) | 109.5     |
| C(31)-C(32)-H(32F)  | 109.5     |
| H(32D)-C(32)-H(32F) | 109.5     |
| H(32E)-C(32)-H(32F) | 109.5     |
| C(31)-C(33)-H(33D)  | 109.5     |
| C(31)-C(33)-H(33E)  | 109.5     |
| H(33D)-C(33)-H(33E) | 109.5     |
| C(31)-C(33)-H(33F)  | 109.5     |
| H(33D)-C(33)-H(33F) | 109.5     |
| H(33E)-C(33)-H(33F) | 109.5     |
| C(28)-C(34)-C(35)   | 115.0(9)  |
| C(28)-C(34)-C(36)   | 112.2(8)  |
| C(35)-C(34)-C(36)   | 109.1(9)  |
| C(28)-C(34)-H(34)   | 106.7     |
| C(35)-C(34)-H(34)   | 106.7     |
| C(36)-C(34)-H(34)   | 106.7     |

|                     |            |
|---------------------|------------|
| C(34)-C(35)-H(35D)  | 109.5      |
| C(34)-C(35)-H(35E)  | 109.5      |
| H(35D)-C(35)-H(35E) | 109.5      |
| C(34)-C(35)-H(35F)  | 109.5      |
| H(35D)-C(35)-H(35F) | 109.5      |
| H(35E)-C(35)-H(35F) | 109.5      |
| C(34)-C(36)-H(36D)  | 109.5      |
| C(34)-C(36)-H(36E)  | 109.5      |
| H(36D)-C(36)-H(36E) | 109.5      |
| C(34)-C(36)-H(36F)  | 109.5      |
| H(36D)-C(36)-H(36F) | 109.5      |
| H(36E)-C(36)-H(36F) | 109.5      |
| C(39)-C(37)-C(30)   | 109.4(7)   |
| C(39)-C(37)-C(38)   | 110.2(8)   |
| C(30)-C(37)-C(38)   | 112.4(8)   |
| C(39)-C(37)-H(37)   | 108.2      |
| C(30)-C(37)-H(37)   | 108.2      |
| C(38)-C(37)-H(37)   | 108.2      |
| C(37)-C(38)-H(38D)  | 109.5      |
| C(37)-C(38)-H(38E)  | 109.5      |
| H(38D)-C(38)-H(38E) | 109.5      |
| C(37)-C(38)-H(38F)  | 109.5      |
| H(38D)-C(38)-H(38F) | 109.5      |
| H(38E)-C(38)-H(38F) | 109.5      |
| C(37)-C(39)-H(39D)  | 109.5      |
| C(37)-C(39)-H(39E)  | 109.5      |
| H(39D)-C(39)-H(39E) | 109.5      |
| C(37)-C(39)-H(39F)  | 109.5      |
| H(39D)-C(39)-H(39F) | 109.5      |
| H(39E)-C(39)-H(39F) | 109.5      |
| P(2)-Au(2)-S(2)     | 177.60(11) |
| C(1B)-S(2)-Au(2)    | 108.2(4)   |
| C(19B)-P(2)-C(13B)  | 104.1(5)   |
| C(19B)-P(2)-C(7B)   | 106.1(5)   |
| C(13B)-P(2)-C(7B)   | 104.4(5)   |
| C(19B)-P(2)-Au(2)   | 115.4(3)   |
| C(13B)-P(2)-Au(2)   | 114.4(4)   |
| C(7B)-P(2)-Au(2)    | 111.4(4)   |
| C(2B)-C(1B)-C(6B)   | 114.4(12)  |
| C(2B)-C(1B)-S(2)    | 119.7(10)  |
| C(6B)-C(1B)-S(2)    | 125.9(10)  |
| F(1B)-C(2B)-C(3B)   | 117.8(11)  |
| F(1B)-C(2B)-C(1B)   | 118.1(11)  |
| C(3B)-C(2B)-C(1B)   | 124.0(13)  |
| C(4B)-C(3B)-C(2B)   | 118.0(12)  |
| C(4B)-C(3B)-H(3B)   | 121.0      |
| C(2B)-C(3B)-H(3B)   | 121.0      |
| C(3B)-C(4B)-F(2B)   | 120.0(12)  |
| C(3B)-C(4B)-C(5B)   | 123.4(12)  |

|                      |           |
|----------------------|-----------|
| F(2B)-C(4B)-C(5B)    | 116.6(14) |
| C(6B)-C(5B)-C(4B)    | 116.6(14) |
| C(6B)-C(5B)-H(5B)    | 121.7     |
| C(4B)-C(5B)-H(5B)    | 121.7     |
| C(5B)-C(6B)-C(1B)    | 123.5(14) |
| C(5B)-C(6B)-H(6B)    | 118.2     |
| C(1B)-C(6B)-H(6B)    | 118.2     |
| C(12B)-C(7B)-C(8B)   | 118.8(17) |
| C(12P)-C(7B)-C(8P)   | 111.8(16) |
| C(12P)-C(7B)-P(2)    | 115.7(10) |
| C(12B)-C(7B)-P(2)    | 121.6(10) |
| C(8B)-C(7B)-P(2)     | 109.0(11) |
| C(8P)-C(7B)-P(2)     | 116.8(10) |
| C(14B)-C(13B)-C(18B) | 109.0(17) |
| C(18P)-C(13B)-C(14P) | 103(6)    |
| C(14B)-C(13B)-P(2)   | 113.4(9)  |
| C(18B)-C(13B)-P(2)   | 114.0(11) |
| C(18P)-C(13B)-P(2)   | 119(3)    |
| C(14P)-C(13B)-P(2)   | 104(2)    |
| C(14B)-C(13B)-H(13B) | 106.6     |
| C(18B)-C(13B)-H(13B) | 106.8     |
| C(18P)-C(13B)-H(13B) | 95.2      |
| C(14P)-C(13B)-H(13B) | 130.4     |
| P(2)-C(13B)-H(13B)   | 106.6     |
| C(24B)-C(19B)-C(20B) | 118.5(8)  |
| C(24B)-C(19B)-P(2)   | 124.7(7)  |
| C(20B)-C(19B)-P(2)   | 116.8(7)  |
| C(21B)-C(20B)-C(19B) | 122.3(9)  |
| C(21B)-C(20B)-H(20B) | 118.9     |
| C(19B)-C(20B)-H(20B) | 118.9     |
| C(22B)-C(21B)-C(20B) | 119.4(9)  |
| C(22B)-C(21B)-H(21B) | 120.3     |
| C(20B)-C(21B)-H(21B) | 120.3     |
| C(21B)-C(22B)-C(23B) | 119.4(9)  |
| C(21B)-C(22B)-H(22B) | 120.3     |
| C(23B)-C(22B)-H(22B) | 120.3     |
| C(22B)-C(23B)-C(24B) | 122.0(9)  |
| C(22B)-C(23B)-H(23B) | 119.0     |
| C(24B)-C(23B)-H(23B) | 119.0     |
| C(19B)-C(24B)-C(23B) | 118.4(8)  |
| C(19B)-C(24B)-C(25B) | 125.2(8)  |
| C(23B)-C(24B)-C(25B) | 116.4(8)  |
| C(26B)-C(25B)-C(30B) | 119.8(8)  |
| C(26B)-C(25B)-C(24B) | 119.7(8)  |
| C(30B)-C(25B)-C(24B) | 120.2(8)  |
| C(25B)-C(26B)-C(27B) | 118.7(8)  |
| C(25B)-C(26B)-C(31B) | 122.9(8)  |
| C(27B)-C(26B)-C(31B) | 118.4(8)  |
| C(28B)-C(27B)-C(26B) | 122.4(8)  |

|                      |           |
|----------------------|-----------|
| C(28B)-C(27B)-H(27B) | 118.8     |
| C(26B)-C(27B)-H(27B) | 118.8     |
| C(27B)-C(28B)-C(29B) | 117.9(8)  |
| C(27B)-C(28B)-C(34B) | 120.1(8)  |
| C(29B)-C(28B)-C(34B) | 121.9(8)  |
| C(30B)-C(29B)-C(28B) | 122.0(8)  |
| C(30B)-C(29B)-H(29B) | 119.0     |
| C(28B)-C(29B)-H(29B) | 119.0     |
| C(29B)-C(30B)-C(25B) | 119.1(8)  |
| C(29B)-C(30B)-C(37B) | 118.8(8)  |
| C(25B)-C(30B)-C(37B) | 122.1(8)  |
| C(32B)-C(31B)-C(26B) | 113.0(9)  |
| C(32B)-C(31B)-C(33B) | 109.9(9)  |
| C(26B)-C(31B)-C(33B) | 109.8(8)  |
| C(32B)-C(31B)-H(31B) | 108.0     |
| C(26B)-C(31B)-H(31B) | 108.0     |
| C(33B)-C(31B)-H(31B) | 108.0     |
| C(31B)-C(32B)-H(32A) | 109.5     |
| C(31B)-C(32B)-H(32B) | 109.5     |
| H(32A)-C(32B)-H(32B) | 109.5     |
| C(31B)-C(32B)-H(32C) | 109.5     |
| H(32A)-C(32B)-H(32C) | 109.5     |
| H(32B)-C(32B)-H(32C) | 109.5     |
| C(31B)-C(33B)-H(33A) | 109.5     |
| C(31B)-C(33B)-H(33B) | 109.5     |
| H(33A)-C(33B)-H(33B) | 109.5     |
| C(31B)-C(33B)-H(33C) | 109.5     |
| H(33A)-C(33B)-H(33C) | 109.5     |
| H(33B)-C(33B)-H(33C) | 109.5     |
| C(36B)-C(34B)-C(35B) | 108.3(11) |
| C(36B)-C(34B)-C(28B) | 114.5(10) |
| C(35B)-C(34B)-C(28B) | 111.8(9)  |
| C(36B)-C(34B)-H(34B) | 107.3     |
| C(35B)-C(34B)-H(34B) | 107.3     |
| C(28B)-C(34B)-H(34B) | 107.3     |
| C(34B)-C(35B)-H(35A) | 109.5     |
| C(34B)-C(35B)-H(35B) | 109.5     |
| H(35A)-C(35B)-H(35B) | 109.5     |
| C(34B)-C(35B)-H(35C) | 109.5     |
| H(35A)-C(35B)-H(35C) | 109.5     |
| H(35B)-C(35B)-H(35C) | 109.5     |
| C(34B)-C(36B)-H(36A) | 109.5     |
| C(34B)-C(36B)-H(36B) | 109.5     |
| H(36A)-C(36B)-H(36B) | 109.5     |
| C(34B)-C(36B)-H(36C) | 109.5     |
| H(36A)-C(36B)-H(36C) | 109.5     |
| H(36B)-C(36B)-H(36C) | 109.5     |
| C(39B)-C(37B)-C(30B) | 114.2(8)  |
| C(39B)-C(37B)-C(38B) | 109.6(9)  |

|                      |           |
|----------------------|-----------|
| C(30B)-C(37B)-C(38B) | 109.4(8)  |
| C(39B)-C(37B)-H(37B) | 107.8     |
| C(30B)-C(37B)-H(37B) | 107.8     |
| C(38B)-C(37B)-H(37B) | 107.8     |
| C(37B)-C(38B)-H(38A) | 109.5     |
| C(37B)-C(38B)-H(38B) | 109.5     |
| H(38A)-C(38B)-H(38B) | 109.5     |
| C(37B)-C(38B)-H(38C) | 109.5     |
| H(38A)-C(38B)-H(38C) | 109.5     |
| H(38B)-C(38B)-H(38C) | 109.5     |
| C(37B)-C(39B)-H(39A) | 109.5     |
| C(37B)-C(39B)-H(39B) | 109.5     |
| H(39A)-C(39B)-H(39B) | 109.5     |
| C(37B)-C(39B)-H(39C) | 109.5     |
| H(39A)-C(39B)-H(39C) | 109.5     |
| H(39B)-C(39B)-H(39C) | 109.5     |
| C(9B)-C(8B)-C(7B)    | 112.5(19) |
| C(9B)-C(8B)-H(8BA)   | 109.1     |
| C(7B)-C(8B)-H(8BA)   | 109.5     |
| C(9B)-C(8B)-H(8BB)   | 108.3     |
| C(7B)-C(8B)-H(8BB)   | 107.9     |
| H(8BA)-C(8B)-H(8BB)  | 109.4     |
| C(10B)-C(9B)-C(8B)   | 111(2)    |
| C(10B)-C(9B)-H(9BA)  | 109.5     |
| C(8B)-C(9B)-H(9BA)   | 109.5     |
| C(10B)-C(9B)-H(9BB)  | 109.5     |
| C(8B)-C(9B)-H(9BB)   | 109.5     |
| H(9BA)-C(9B)-H(9BB)  | 108.1     |
| C(9B)-C(10B)-C(11B)  | 113(2)    |
| C(9B)-C(10B)-H(10A)  | 109.0     |
| C(11B)-C(10B)-H(10A) | 109.0     |
| C(9B)-C(10B)-H(10B)  | 109.0     |
| C(11B)-C(10B)-H(10B) | 109.0     |
| H(10A)-C(10B)-H(10B) | 107.8     |
| C(10B)-C(11B)-C(12B) | 114(2)    |
| C(10B)-C(11B)-H(11A) | 108.7     |
| C(12B)-C(11B)-H(11A) | 108.7     |
| C(10B)-C(11B)-H(11B) | 108.7     |
| C(12B)-C(11B)-H(11B) | 108.7     |
| H(11A)-C(11B)-H(11B) | 107.6     |
| C(7B)-C(12B)-C(11B)  | 104.7(17) |
| C(7B)-C(12B)-H(12A)  | 110.0     |
| C(11B)-C(12B)-H(12A) | 110.6     |
| C(7B)-C(12B)-H(12B)  | 111.4     |
| C(11B)-C(12B)-H(12B) | 110.6     |
| H(12A)-C(12B)-H(12B) | 109.5     |
| C(13B)-C(14B)-C(15B) | 110.5(14) |
| C(13B)-C(14B)-H(14A) | 110.3     |
| C(15B)-C(14B)-H(14A) | 109.8     |

|                      |           |
|----------------------|-----------|
| C(13B)-C(14B)-H(14B) | 107.8     |
| C(15B)-C(14B)-H(14B) | 108.8     |
| H(14A)-C(14B)-H(14B) | 109.5     |
| C(16B)-C(15B)-C(14B) | 112.4(16) |
| C(16B)-C(15B)-H(15A) | 109.1     |
| C(14B)-C(15B)-H(15A) | 109.1     |
| C(16B)-C(15B)-H(15B) | 109.1     |
| C(14B)-C(15B)-H(15B) | 109.1     |
| H(15A)-C(15B)-H(15B) | 107.9     |
| C(17B)-C(16B)-C(15B) | 108.7(15) |
| C(17B)-C(16B)-H(16A) | 109.9     |
| C(15B)-C(16B)-H(16A) | 109.9     |
| C(17B)-C(16B)-H(16B) | 109.9     |
| C(15B)-C(16B)-H(16B) | 109.9     |
| H(16A)-C(16B)-H(16B) | 108.3     |
| C(16B)-C(17B)-C(18B) | 111(2)    |
| C(16B)-C(17B)-H(17A) | 109.4     |
| C(18B)-C(17B)-H(17A) | 109.4     |
| C(16B)-C(17B)-H(17B) | 109.4     |
| C(18B)-C(17B)-H(17B) | 109.4     |
| H(17A)-C(17B)-H(17B) | 108.0     |
| C(13B)-C(18B)-C(17B) | 112.4(16) |
| C(13B)-C(18B)-H(18A) | 108.8     |
| C(17B)-C(18B)-H(18A) | 108.8     |
| C(13B)-C(18B)-H(18B) | 108.5     |
| C(17B)-C(18B)-H(18B) | 108.9     |
| H(18A)-C(18B)-H(18B) | 109.4     |
| C(9P)-C(8P)-C(7B)    | 116.9(17) |
| C(9P)-C(8P)-H(8PA)   | 108.1     |
| C(7B)-C(8P)-H(8PA)   | 108.1     |
| C(9P)-C(8P)-H(8PB)   | 108.1     |
| C(7B)-C(8P)-H(8PB)   | 108.1     |
| H(8PA)-C(8P)-H(8PB)  | 107.3     |
| C(8P)-C(9P)-C(10P)   | 110(2)    |
| C(8P)-C(9P)-H(9PA)   | 109.6     |
| C(10P)-C(9P)-H(9PA)  | 109.6     |
| C(8P)-C(9P)-H(9PB)   | 109.6     |
| C(10P)-C(9P)-H(9PB)  | 109.6     |
| H(9PA)-C(9P)-H(9PB)  | 108.1     |
| C(11P)-C(10P)-C(9P)  | 114(2)    |
| C(11P)-C(10P)-H(10C) | 108.7     |
| C(9P)-C(10P)-H(10C)  | 108.7     |
| C(11P)-C(10P)-H(10D) | 108.7     |
| C(9P)-C(10P)-H(10D)  | 108.7     |
| H(10C)-C(10P)-H(10D) | 107.6     |
| C(10P)-C(11P)-C(12P) | 112.7(18) |
| C(10P)-C(11P)-H(11C) | 109.1     |
| C(12P)-C(11P)-H(11C) | 109.1     |
| C(10P)-C(11P)-H(11D) | 109.1     |

|                      |           |
|----------------------|-----------|
| C(12P)-C(11P)-H(11D) | 109.1     |
| H(11C)-C(11P)-H(11D) | 107.8     |
| C(7B)-C(12P)-C(11P)  | 112.0(17) |
| C(7B)-C(12P)-H(12C)  | 109.2     |
| C(11P)-C(12P)-H(12C) | 107.4     |
| C(7B)-C(12P)-H(12D)  | 108.8     |
| C(11P)-C(12P)-H(12D) | 109.9     |
| H(12C)-C(12P)-H(12D) | 109.5     |
| C(13B)-C(14P)-C(15P) | 108(4)    |
| C(13B)-C(14P)-H(14C) | 108.9     |
| C(15P)-C(14P)-H(14C) | 109.0     |
| C(13B)-C(14P)-H(14D) | 109.6     |
| C(15P)-C(14P)-H(14D) | 112.0     |
| H(14C)-C(14P)-H(14D) | 109.5     |
| C(14P)-C(15P)-C(16P) | 115(6)    |
| C(14P)-C(15P)-H(15C) | 108.4     |
| C(16P)-C(15P)-H(15C) | 108.4     |
| C(14P)-C(15P)-H(15D) | 108.4     |
| C(16P)-C(15P)-H(15D) | 108.4     |
| H(15C)-C(15P)-H(15D) | 107.5     |
| C(17P)-C(16P)-C(15P) | 92(2)     |
| C(17P)-C(16P)-H(16C) | 113.2     |
| C(15P)-C(16P)-H(16C) | 113.2     |
| C(17P)-C(16P)-H(16D) | 113.2     |
| C(15P)-C(16P)-H(16D) | 113.2     |
| H(16C)-C(16P)-H(16D) | 110.6     |
| C(16P)-C(17P)-C(18P) | 123(6)    |
| C(16P)-C(17P)-H(17C) | 106.6     |
| C(18P)-C(17P)-H(17C) | 106.6     |
| C(16P)-C(17P)-H(17D) | 106.6     |
| C(18P)-C(17P)-H(17D) | 106.6     |
| H(17C)-C(17P)-H(17D) | 106.6     |
| C(13B)-C(18P)-C(17P) | 101(5)    |
| C(13B)-C(18P)-H(18C) | 105.2     |
| C(17P)-C(18P)-H(18C) | 112.7     |
| C(13B)-C(18P)-H(18D) | 114.5     |
| C(17P)-C(18P)-H(18D) | 113.2     |
| H(18C)-C(18P)-H(18D) | 109.5     |

---

Table S31.. Anisotropic displacement parameters ( $\text{\AA}^2 \times 10^3$ ) for cldr08b. The anisotropic displacement factor exponent takes the form:  $-2\pi^2 [h^2 a^{*2} U^{11} + \dots + 2 h k a^* b^* U^{12}]$

|       | U <sup>11</sup> | U <sup>22</sup> | U <sup>33</sup> | U <sup>23</sup> | U <sup>13</sup> | U <sup>12</sup> |
|-------|-----------------|-----------------|-----------------|-----------------|-----------------|-----------------|
| Au(1) | 35(1)           | 35(1)           | 29(1)           | -7(1)           | -2(1)           | -8(1)           |
| S(1)  | 50(2)           | 44(2)           | 49(2)           | -11(1)          | -3(1)           | -20(1)          |
| P(1)  | 26(1)           | 28(1)           | 25(1)           | 2(1)            | -5(1)           | -5(1)           |
| F(1)  | 174(9)          | 186(9)          | 113(7)          | -63(7)          | -11(6)          | -82(7)          |
| F(2)  | 174(9)          | 186(9)          | 113(7)          | -63(7)          | -11(6)          | -82(7)          |
| C(1)  | 55(7)           | 47(8)           | 55(7)           | -13(6)          | -17(6)          | -3(6)           |
| C(2)  | 68(9)           | 74(11)          | 80(10)          | -29(8)          | -27(8)          | 4(8)            |
| C(3)  | 155(12)         | 135(11)         | 77(7)           | -53(8)          | -31(7)          | -42(8)          |
| C(4)  | 155(12)         | 135(11)         | 77(7)           | -53(8)          | -31(7)          | -42(8)          |
| C(5)  | 155(12)         | 135(11)         | 77(7)           | -53(8)          | -31(7)          | -42(8)          |
| C(6)  | 151(17)         | 80(12)          | 55(9)           | -24(8)          | 4(10)           | -41(11)         |
| C(7)  | 44(6)           | 45(7)           | 41(6)           | 2(5)            | -21(5)          | -3(5)           |
| C(8)  | 117(12)         | 46(8)           | 59(8)           | 2(6)            | -58(8)          | -5(8)           |
| C(9)  | 200(20)         | 60(11)          | 119(15)         | 32(10)          | -136(16)        | -33(12)         |
| C(10) | 149(17)         | 67(11)          | 60(9)           | 10(8)           | -50(10)         | 12(11)          |
| C(11) | 168(17)         | 42(8)           | 71(9)           | -18(7)          | -69(11)         | 27(9)           |
| C(12) | 90(11)          | 47(8)           | 63(8)           | -4(6)           | -27(7)          | -1(7)           |
| C(13) | 40(4)           | 58(6)           | 58(5)           | -15(4)          | -16(4)          | 16(4)           |
| C(14) | 51(7)           | 120(13)         | 29(6)           | -16(7)          | 2(5)            | 9(8)            |
| C(15) | 50(7)           | 125(14)         | 34(6)           | 0(7)            | 10(5)           | 13(8)           |
| C(16) | 43(7)           | 78(10)          | 65(8)           | -17(7)          | 12(6)           | -1(6)           |
| C(17) | 40(4)           | 58(6)           | 58(5)           | -15(4)          | -16(4)          | 16(4)           |
| C(18) | 62(8)           | 97(11)          | 26(5)           | -12(6)          | -4(5)           | 15(7)           |
| C(19) | 29(5)           | 21(5)           | 26(4)           | -1(3)           | -8(3)           | -2(4)           |
| C(20) | 30(5)           | 29(6)           | 38(5)           | 0(4)            | 0(4)            | -5(4)           |
| C(21) | 26(5)           | 39(6)           | 47(6)           | -8(5)           | -6(4)           | -4(4)           |
| C(22) | 42(6)           | 31(6)           | 42(6)           | -10(4)          | -14(4)          | -3(4)           |
| C(23) | 34(5)           | 31(6)           | 36(5)           | -6(4)           | -8(4)           | 3(4)            |
| C(24) | 25(4)           | 13(4)           | 31(4)           | 0(3)            | -5(3)           | 5(3)            |
| C(25) | 18(4)           | 27(5)           | 21(4)           | -4(3)           | -4(3)           | -1(3)           |
| C(26) | 26(5)           | 27(5)           | 27(4)           | -2(4)           | -4(3)           | 1(4)            |
| C(27) | 22(4)           | 25(5)           | 32(5)           | 2(4)            | -4(3)           | 5(4)            |
| C(28) | 26(5)           | 32(5)           | 23(4)           | 1(4)            | -1(3)           | -5(4)           |
| C(29) | 24(4)           | 22(5)           | 35(5)           | 1(4)            | -4(4)           | 2(4)            |
| C(30) | 29(5)           | 29(5)           | 22(4)           | 0(4)            | 5(3)            | 3(4)            |
| C(31) | 31(5)           | 18(5)           | 57(6)           | 1(4)            | -10(4)          | 2(4)            |
| C(32) | 69(9)           | 36(7)           | 77(9)           | -21(6)          | 6(7)            | 16(6)           |
| C(33) | 54(7)           | 35(7)           | 89(10)          | 18(6)           | -34(7)          | 7(6)            |
| C(34) | 33(5)           | 32(6)           | 44(6)           | -11(4)          | 0(4)            | -3(4)           |
| C(35) | 28(6)           | 63(9)           | 74(8)           | 20(7)           | -5(5)           | -11(5)          |
| C(36) | 36(6)           | 66(9)           | 62(8)           | 24(6)           | -7(5)           | -21(6)          |
| C(37) | 24(4)           | 23(5)           | 31(5)           | 2(4)            | -4(3)           | -3(4)           |
| C(38) | 53(7)           | 26(6)           | 49(6)           | -9(5)           | -6(5)           | 12(5)           |
| C(39) | 38(6)           | 64(8)           | 38(6)           | 1(5)            | -11(5)          | 16(5)           |



|        |         |         |       |        |        |        |
|--------|---------|---------|-------|--------|--------|--------|
| Au(2)  | 55(1)   | 44(1)   | 29(1) | -6(1)  | -4(1)  | 19(1)  |
| S(2)   | 79(2)   | 56(2)   | 45(2) | -8(1)  | -10(2) | 36(2)  |
| P(2)   | 32(1)   | 31(1)   | 24(1) | 1(1)   | -5(1)  | 2(1)   |
| F(1B)  | 70(5)   | 83(6)   | 85(6) | 4(5)   | -12(4) | 32(5)  |
| F(2B)  | 74(5)   | 106(7)  | 71(5) | -56(5) | 7(4)   | 7(5)   |
| C(1B)  | 69(8)   | 46(8)   | 53(7) | -12(6) | -14(6) | 16(6)  |
| C(2B)  | 31(6)   | 42(7)   | 69(8) | -7(6)  | -1(5)  | 0(5)   |
| C(3B)  | 54(8)   | 53(8)   | 74(9) | -26(7) | 0(7)   | 12(6)  |
| C(4B)  | 51(7)   | 66(9)   | 67(9) | -28(7) | 6(6)   | 1(7)   |
| C(5B)  | 86(11)  | 109(13) | 50(8) | -28(8) | -7(7)  | 32(10) |
| C(6B)  | 105(12) | 83(11)  | 47(7) | -11(7) | 1(8)   | 39(9)  |
| C(7B)  | 46(5)   | 60(6)   | 33(4) | 4(4)   | -14(4) | -17(4) |
| C(13B) | 64(8)   | 52(8)   | 49(7) | 4(6)   | 3(6)   | -24(6) |
| C(19B) | 27(5)   | 22(5)   | 32(5) | 0(4)   | -2(4)  | 2(4)   |
| C(20B) | 31(5)   | 25(5)   | 36(5) | 5(4)   | -7(4)  | 5(4)   |
| C(21B) | 23(5)   | 30(6)   | 51(6) | 4(4)   | -7(4)  | 7(4)   |
| C(22B) | 32(5)   | 36(6)   | 36(5) | -4(4)  | 1(4)   | 6(4)   |
| C(23B) | 36(5)   | 29(5)   | 31(5) | 2(4)   | -4(4)  | 2(4)   |
| C(24B) | 21(4)   | 24(5)   | 27(4) | -2(4)  | -4(3)  | -4(3)  |
| C(25B) | 29(5)   | 26(5)   | 19(4) | -5(3)  | -1(3)  | 5(4)   |
| C(26B) | 25(4)   | 21(5)   | 32(5) | 1(4)   | -4(3)  | 2(4)   |
| C(27B) | 23(4)   | 35(6)   | 31(5) | -8(4)  | -8(4)  | 2(4)   |
| C(28B) | 29(5)   | 26(5)   | 31(5) | -14(4) | -9(4)  | 7(4)   |
| C(29B) | 37(5)   | 17(5)   | 28(4) | -1(3)  | -11(4) | 1(4)   |
| C(30B) | 32(5)   | 22(5)   | 22(4) | -4(3)  | -12(3) | -2(4)  |
| C(31B) | 27(5)   | 35(6)   | 48(6) | 3(5)   | -8(4)  | 3(4)   |
| C(32B) | 34(6)   | 36(7)   | 84(9) | 15(6)  | -9(6)  | -12(5) |
| C(33B) | 58(7)   | 35(7)   | 67(8) | -16(6) | -21(6) | 2(5)   |
| C(34B) | 33(5)   | 29(6)   | 59(7) | -10(5) | -20(5) | 4(4)   |
| C(35B) | 67(10)  | 190(20) | 41(7) | 45(10) | 6(6)   | 68(11) |
| C(36B) | 65(9)   | 148(16) | 52(8) | 20(9)  | 11(7)  | 74(10) |
| C(37B) | 27(5)   | 20(5)   | 46(5) | 1(4)   | -13(4) | -6(4)  |
| C(38B) | 39(6)   | 57(8)   | 46(6) | -4(5)  | -10(5) | -9(5)  |
| C(39B) | 51(7)   | 31(6)   | 61(7) | -6(5)  | -25(5) | -14(5) |
| C(8B)  | 46(5)   | 60(6)   | 33(4) | 4(4)   | -14(4) | -17(4) |
| C(9B)  | 46(5)   | 60(6)   | 33(4) | 4(4)   | -14(4) | -17(4) |
| C(10B) | 46(5)   | 60(6)   | 33(4) | 4(4)   | -14(4) | -17(4) |
| C(11B) | 46(5)   | 60(6)   | 33(4) | 4(4)   | -14(4) | -17(4) |
| C(12B) | 46(5)   | 60(6)   | 33(4) | 4(4)   | -14(4) | -17(4) |
| C(14B) | 128(9)  | 71(6)   | 45(4) | 7(4)   | -3(5)  | -50(6) |
| C(15B) | 128(9)  | 71(6)   | 45(4) | 7(4)   | -3(5)  | -50(6) |
| C(16B) | 128(9)  | 71(6)   | 45(4) | 7(4)   | -3(5)  | -50(6) |
| C(17B) | 128(9)  | 71(6)   | 45(4) | 7(4)   | -3(5)  | -50(6) |
| C(18B) | 128(9)  | 71(6)   | 45(4) | 7(4)   | -3(5)  | -50(6) |
| C(8P)  | 89(10)  | 116(12) | 62(7) | 1(7)   | -20(6) | -62(9) |
| C(9P)  | 89(10)  | 116(12) | 62(7) | 1(7)   | -20(6) | -62(9) |
| C(10P) | 89(10)  | 116(12) | 62(7) | 1(7)   | -20(6) | -62(9) |
| C(11P) | 89(10)  | 116(12) | 62(7) | 1(7)   | -20(6) | -62(9) |
| C(12P) | 89(10)  | 116(12) | 62(7) | 1(7)   | -20(6) | -62(9) |

|        |        |       |       |      |       |        |
|--------|--------|-------|-------|------|-------|--------|
| C(14P) | 128(9) | 71(6) | 45(4) | 7(4) | -3(5) | -50(6) |
| C(15P) | 128(9) | 71(6) | 45(4) | 7(4) | -3(5) | -50(6) |
| C(16P) | 128(9) | 71(6) | 45(4) | 7(4) | -3(5) | -50(6) |
| C(17P) | 128(9) | 71(6) | 45(4) | 7(4) | -3(5) | -50(6) |
| C(18P) | 128(9) | 71(6) | 45(4) | 7(4) | -3(5) | -50(6) |

---

Table S32. Torsion angles [°] for cldr08b.

|                         |            |
|-------------------------|------------|
| Au(1)-S(1)-C(1)-C(6)    | -15.5(15)  |
| Au(1)-S(1)-C(1)-C(2)    | 169.2(10)  |
| C(6)-C(1)-C(2)-F(1)     | -173.7(16) |
| S(1)-C(1)-C(2)-F(1)     | 2(2)       |
| C(6)-C(1)-C(2)-C(3)     | 3(3)       |
| S(1)-C(1)-C(2)-C(3)     | 178.7(16)  |
| F(1)-C(2)-C(3)-C(4)     | -179(2)    |
| C(1)-C(2)-C(3)-C(4)     | 4(3)       |
| C(2)-C(3)-C(4)-F(2)     | 177.5(19)  |
| C(2)-C(3)-C(4)-C(5)     | -12(4)     |
| C(3)-C(4)-C(5)-C(6)     | 12(4)      |
| F(2)-C(4)-C(5)-C(6)     | -177(2)    |
| C(2)-C(1)-C(6)-C(5)     | -3(3)      |
| S(1)-C(1)-C(6)-C(5)     | -178.1(16) |
| C(4)-C(5)-C(6)-C(1)     | -4(3)      |
| C(13)-P(1)-C(7)-C(12)   | 53.7(11)   |
| C(19)-P(1)-C(7)-C(12)   | -55.5(11)  |
| Au(1)-P(1)-C(7)-C(12)   | 179.4(9)   |
| C(13)-P(1)-C(7)-C(8)    | -78.0(10)  |
| C(19)-P(1)-C(7)-C(8)    | 172.8(9)   |
| Au(1)-P(1)-C(7)-C(8)    | 47.7(10)   |
| C(12)-C(7)-C(8)-C(9)    | 49.2(19)   |
| P(1)-C(7)-C(8)-C(9)     | -175.8(13) |
| C(7)-C(8)-C(9)-C(10)    | -47(2)     |
| C(8)-C(9)-C(10)-C(11)   | 53(3)      |
| C(9)-C(10)-C(11)-C(12)  | -58(2)     |
| C(8)-C(7)-C(12)-C(11)   | -57.6(16)  |
| P(1)-C(7)-C(12)-C(11)   | 171.3(10)  |
| C(10)-C(11)-C(12)-C(7)  | 60.7(19)   |
| C(19)-P(1)-C(13)-C(14)  | -175.0(10) |
| C(7)-P(1)-C(13)-C(14)   | 76.4(11)   |
| Au(1)-P(1)-C(13)-C(14)  | -48.3(11)  |
| C(19)-P(1)-C(13)-C(18)  | -53.6(10)  |
| C(7)-P(1)-C(13)-C(18)   | -162.3(9)  |
| Au(1)-P(1)-C(13)-C(18)  | 73.0(9)    |
| C(18)-C(13)-C(14)-C(15) | 57.3(16)   |
| P(1)-C(13)-C(14)-C(15)  | -178.2(10) |
| C(13)-C(14)-C(15)-C(16) | -56.5(18)  |
| C(14)-C(15)-C(16)-C(17) | 53.1(17)   |
| C(15)-C(16)-C(17)-C(18) | -55.2(16)  |
| C(16)-C(17)-C(18)-C(13) | 59.0(15)   |
| C(14)-C(13)-C(18)-C(17) | -59.4(14)  |
| P(1)-C(13)-C(18)-C(17)  | 176.0(9)   |
| C(13)-P(1)-C(19)-C(24)  | 139.2(8)   |
| C(7)-P(1)-C(19)-C(24)   | -109.2(8)  |
| Au(1)-P(1)-C(19)-C(24)  | 13.6(9)    |
| C(13)-P(1)-C(19)-C(20)  | -38.7(9)   |

|                         |            |
|-------------------------|------------|
| C(7)-P(1)-C(19)-C(20)   | 72.9(8)    |
| Au(1)-P(1)-C(19)-C(20)  | -164.3(6)  |
| C(24)-C(19)-C(20)-C(21) | -0.1(14)   |
| P(1)-C(19)-C(20)-C(21)  | 178.0(8)   |
| C(19)-C(20)-C(21)-C(22) | -0.3(16)   |
| C(20)-C(21)-C(22)-C(23) | 0.5(16)    |
| C(21)-C(22)-C(23)-C(24) | -0.4(15)   |
| C(22)-C(23)-C(24)-C(19) | 0.1(14)    |
| C(22)-C(23)-C(24)-C(25) | -179.8(8)  |
| C(20)-C(19)-C(24)-C(23) | 0.2(13)    |
| P(1)-C(19)-C(24)-C(23)  | -177.8(7)  |
| C(20)-C(19)-C(24)-C(25) | -179.9(8)  |
| P(1)-C(19)-C(24)-C(25)  | 2.1(12)    |
| C(23)-C(24)-C(25)-C(30) | 85.0(10)   |
| C(19)-C(24)-C(25)-C(30) | -94.9(10)  |
| C(23)-C(24)-C(25)-C(26) | -89.6(10)  |
| C(19)-C(24)-C(25)-C(26) | 90.5(11)   |
| C(30)-C(25)-C(26)-C(27) | 1.9(12)    |
| C(24)-C(25)-C(26)-C(27) | 176.5(8)   |
| C(30)-C(25)-C(26)-C(31) | -176.7(8)  |
| C(24)-C(25)-C(26)-C(31) | -2.1(12)   |
| C(25)-C(26)-C(27)-C(28) | -1.5(13)   |
| C(31)-C(26)-C(27)-C(28) | 177.1(8)   |
| C(26)-C(27)-C(28)-C(29) | 0.6(13)    |
| C(26)-C(27)-C(28)-C(34) | 179.1(8)   |
| C(27)-C(28)-C(29)-C(30) | 0.0(13)    |
| C(34)-C(28)-C(29)-C(30) | -178.6(8)  |
| C(26)-C(25)-C(30)-C(29) | -1.4(12)   |
| C(24)-C(25)-C(30)-C(29) | -176.0(8)  |
| C(26)-C(25)-C(30)-C(37) | 177.4(8)   |
| C(24)-C(25)-C(30)-C(37) | 2.8(12)    |
| C(28)-C(29)-C(30)-C(25) | 0.4(13)    |
| C(28)-C(29)-C(30)-C(37) | -178.4(8)  |
| C(27)-C(26)-C(31)-C(32) | -76.9(12)  |
| C(25)-C(26)-C(31)-C(32) | 101.7(11)  |
| C(27)-C(26)-C(31)-C(33) | 48.5(13)   |
| C(25)-C(26)-C(31)-C(33) | -132.9(10) |
| C(27)-C(28)-C(34)-C(35) | -7.0(14)   |
| C(29)-C(28)-C(34)-C(35) | 171.5(9)   |
| C(27)-C(28)-C(34)-C(36) | 118.5(11)  |
| C(29)-C(28)-C(34)-C(36) | -63.0(12)  |
| C(25)-C(30)-C(37)-C(39) | -104.4(10) |
| C(29)-C(30)-C(37)-C(39) | 74.4(11)   |
| C(25)-C(30)-C(37)-C(38) | 132.8(9)   |
| C(29)-C(30)-C(37)-C(38) | -48.4(11)  |
| Au(2)-S(2)-C(1B)-C(2B)  | 176.1(9)   |
| Au(2)-S(2)-C(1B)-C(6B)  | -6.2(15)   |
| C(6B)-C(1B)-C(2B)-F(1B) | -179.6(13) |
| S(2)-C(1B)-C(2B)-F(1B)  | -1.6(17)   |

|                             |            |
|-----------------------------|------------|
| C(6B)-C(1B)-C(2B)-C(3B)     | 4(2)       |
| S(2)-C(1B)-C(2B)-C(3B)      | -178.2(10) |
| F(1B)-C(2B)-C(3B)-C(4B)     | 179.7(12)  |
| C(1B)-C(2B)-C(3B)-C(4B)     | -4(2)      |
| C(2B)-C(3B)-C(4B)-F(2B)     | -179.1(11) |
| C(2B)-C(3B)-C(4B)-C(5B)     | 2(2)       |
| C(3B)-C(4B)-C(5B)-C(6B)     | 0(2)       |
| F(2B)-C(4B)-C(5B)-C(6B)     | -179.4(14) |
| C(4B)-C(5B)-C(6B)-C(1B)     | 0(3)       |
| C(2B)-C(1B)-C(6B)-C(5B)     | -2(2)      |
| S(2)-C(1B)-C(6B)-C(5B)      | -179.9(14) |
| C(19B)-P(2)-C(7B)-C(12P)    | 178.8(13)  |
| C(13B)-P(2)-C(7B)-C(12P)    | -71.5(14)  |
| Au(2)-P(2)-C(7B)-C(12P)     | 52.5(14)   |
| C(19B)-P(2)-C(7B)-C(12B)    | -80.2(15)  |
| C(13B)-P(2)-C(7B)-C(12B)    | 29.4(16)   |
| Au(2)-P(2)-C(7B)-C(12B)     | 153.4(14)  |
| C(19B)-P(2)-C(7B)-C(8B)     | 63.7(17)   |
| C(13B)-P(2)-C(7B)-C(8B)     | 173.4(17)  |
| Au(2)-P(2)-C(7B)-C(8B)      | -62.6(17)  |
| C(19B)-P(2)-C(7B)-C(8P)     | 44.1(18)   |
| C(13B)-P(2)-C(7B)-C(8P)     | 153.8(17)  |
| Au(2)-P(2)-C(7B)-C(8P)      | -82.3(17)  |
| C(19B)-P(2)-C(13B)-C(14B)   | -179.8(13) |
| C(7B)-P(2)-C(13B)-C(14B)    | 69.1(14)   |
| Au(2)-P(2)-C(13B)-C(14B)    | -53.0(14)  |
| C(19B)-P(2)-C(13B)-C(18B)   | -54(2)     |
| C(7B)-P(2)-C(13B)-C(18B)    | -165.4(19) |
| Au(2)-P(2)-C(13B)-C(18B)    | 73(2)      |
| C(19B)-P(2)-C(13B)-C(18P)   | -42(7)     |
| C(7B)-P(2)-C(13B)-C(18P)    | -153(7)    |
| Au(2)-P(2)-C(13B)-C(18P)    | 85(7)      |
| C(19B)-P(2)-C(13B)-C(14P)   | -156(3)    |
| C(7B)-P(2)-C(13B)-C(14P)    | 93(3)      |
| Au(2)-P(2)-C(13B)-C(14P)    | -29(3)     |
| C(13B)-P(2)-C(19B)-C(24B)   | 119.3(9)   |
| C(7B)-P(2)-C(19B)-C(24B)    | -130.9(8)  |
| Au(2)-P(2)-C(19B)-C(24B)    | -7.0(9)    |
| C(13B)-P(2)-C(19B)-C(20B)   | -62.0(9)   |
| C(7B)-P(2)-C(19B)-C(20B)    | 47.8(8)    |
| Au(2)-P(2)-C(19B)-C(20B)    | 171.7(6)   |
| C(24B)-C(19B)-C(20B)-C(21B) | -0.1(14)   |
| P(2)-C(19B)-C(20B)-C(21B)   | -178.8(8)  |
| C(19B)-C(20B)-C(21B)-C(22B) | 1.3(15)    |
| C(20B)-C(21B)-C(22B)-C(23B) | -1.6(15)   |
| C(21B)-C(22B)-C(23B)-C(24B) | 0.8(15)    |
| C(20B)-C(19B)-C(24B)-C(23B) | -0.8(13)   |
| P(2)-C(19B)-C(24B)-C(23B)   | 177.9(7)   |
| C(20B)-C(19B)-C(24B)-C(25B) | 177.2(8)   |

|                             |            |
|-----------------------------|------------|
| P(2)-C(19B)-C(24B)-C(25B)   | -4.1(13)   |
| C(22B)-C(23B)-C(24B)-C(19B) | 0.4(14)    |
| C(22B)-C(23B)-C(24B)-C(25B) | -177.8(9)  |
| C(19B)-C(24B)-C(25B)-C(26B) | -93.5(11)  |
| C(23B)-C(24B)-C(25B)-C(26B) | 84.5(10)   |
| C(19B)-C(24B)-C(25B)-C(30B) | 93.0(11)   |
| C(23B)-C(24B)-C(25B)-C(30B) | -89.0(10)  |
| C(30B)-C(25B)-C(26B)-C(27B) | -3.5(12)   |
| C(24B)-C(25B)-C(26B)-C(27B) | -177.0(8)  |
| C(30B)-C(25B)-C(26B)-C(31B) | 173.8(8)   |
| C(24B)-C(25B)-C(26B)-C(31B) | 0.3(13)    |
| C(25B)-C(26B)-C(27B)-C(28B) | 1.0(13)    |
| C(31B)-C(26B)-C(27B)-C(28B) | -176.4(8)  |
| C(26B)-C(27B)-C(28B)-C(29B) | 2.0(13)    |
| C(26B)-C(27B)-C(28B)-C(34B) | -179.3(9)  |
| C(27B)-C(28B)-C(29B)-C(30B) | -2.5(13)   |
| C(34B)-C(28B)-C(29B)-C(30B) | 178.8(9)   |
| C(28B)-C(29B)-C(30B)-C(25B) | 0.1(13)    |
| C(28B)-C(29B)-C(30B)-C(37B) | 179.5(8)   |
| C(26B)-C(25B)-C(30B)-C(29B) | 3.0(12)    |
| C(24B)-C(25B)-C(30B)-C(29B) | 176.5(8)   |
| C(26B)-C(25B)-C(30B)-C(37B) | -176.4(8)  |
| C(24B)-C(25B)-C(30B)-C(37B) | -2.9(12)   |
| C(25B)-C(26B)-C(31B)-C(32B) | 139.4(9)   |
| C(27B)-C(26B)-C(31B)-C(32B) | -43.3(12)  |
| C(25B)-C(26B)-C(31B)-C(33B) | -97.4(10)  |
| C(27B)-C(26B)-C(31B)-C(33B) | 79.9(11)   |
| C(27B)-C(28B)-C(34B)-C(36B) | 44.3(14)   |
| C(29B)-C(28B)-C(34B)-C(36B) | -137.0(12) |
| C(27B)-C(28B)-C(34B)-C(35B) | -79.3(14)  |
| C(29B)-C(28B)-C(34B)-C(35B) | 99.4(13)   |
| C(29B)-C(30B)-C(37B)-C(39B) | 44.7(12)   |
| C(25B)-C(30B)-C(37B)-C(39B) | -135.9(9)  |
| C(29B)-C(30B)-C(37B)-C(38B) | -78.5(11)  |
| C(25B)-C(30B)-C(37B)-C(38B) | 100.9(10)  |
| C(12B)-C(7B)-C(8B)-C(9B)    | -50(3)     |
| P(2)-C(7B)-C(8B)-C(9B)      | 165(2)     |
| C(7B)-C(8B)-C(9B)-C(10B)    | 45(4)      |
| C(8B)-C(9B)-C(10B)-C(11B)   | -51(4)     |
| C(9B)-C(10B)-C(11B)-C(12B)  | 59(4)      |
| C(8B)-C(7B)-C(12B)-C(11B)   | 52(3)      |
| P(2)-C(7B)-C(12B)-C(11B)    | -167.0(14) |
| C(10B)-C(11B)-C(12B)-C(7B)  | -55(3)     |
| C(18B)-C(13B)-C(14B)-C(15B) | 57(2)      |
| P(2)-C(13B)-C(14B)-C(15B)   | -175.3(14) |
| C(13B)-C(14B)-C(15B)-C(16B) | -58(3)     |
| C(14B)-C(15B)-C(16B)-C(17B) | 57(3)      |
| C(15B)-C(16B)-C(17B)-C(18B) | -55(3)     |
| C(14B)-C(13B)-C(18B)-C(17B) | -57(3)     |

|                             |           |
|-----------------------------|-----------|
| P(2)-C(13B)-C(18B)-C(17B)   | 175.3(19) |
| C(16B)-C(17B)-C(18B)-C(13B) | 57(3)     |
| C(12P)-C(7B)-C(8P)-C(9P)    | 50(3)     |
| P(2)-C(7B)-C(8P)-C(9P)      | -174(2)   |
| C(7B)-C(8P)-C(9P)-C(10P)    | -48(4)    |
| C(8P)-C(9P)-C(10P)-C(11P)   | 48(4)     |
| C(9P)-C(10P)-C(11P)-C(12P)  | -52(4)    |
| C(8P)-C(7B)-C(12P)-C(11P)   | -50(3)    |
| P(2)-C(7B)-C(12P)-C(11P)    | 172.8(15) |
| C(10P)-C(11P)-C(12P)-C(7B)  | 53(3)     |
| C(18P)-C(13B)-C(14P)-C(15P) | 41(6)     |
| P(2)-C(13B)-C(14P)-C(15P)   | 165(4)    |
| C(13B)-C(14P)-C(15P)-C(16P) | 38(7)     |
| C(14P)-C(15P)-C(16P)-C(17P) | -71(6)    |
| C(15P)-C(16P)-C(17P)-C(18P) | 30(9)     |
| C(14P)-C(13B)-C(18P)-C(17P) | -75(8)    |
| P(2)-C(13B)-C(18P)-C(17P)   | 170(5)    |
| C(16P)-C(17P)-C(18P)-C(13B) | 38(12)    |

---

## Compound 8

Table S33. Crystal data and structure refinement for cldr03.

|                                   |                                                       |                 |
|-----------------------------------|-------------------------------------------------------|-----------------|
| Identification code               | cldr03                                                |                 |
| Empirical formula                 | C <sub>39</sub> H <sub>52</sub> Au F <sub>2</sub> P S |                 |
| Formula weight                    | 818.80                                                |                 |
| Temperature                       | 130(2) K                                              |                 |
| Wavelength                        | 0.71073 Å                                             |                 |
| Crystal system                    | Monoclinic                                            |                 |
| Space group                       | P 2 <sub>1</sub> /n                                   |                 |
| Unit cell dimensions              | a = 11.1506(3) Å                                      | α = 90°.        |
|                                   | b = 18.0770(7) Å                                      | β = 98.273(3)°. |
|                                   | c = 17.9759(5) Å                                      | γ = 90°.        |
| Volume                            | 3585.7(2) Å <sup>3</sup>                              |                 |
| Z                                 | 4                                                     |                 |
| Density (calculated)              | 1.517 Mg/m <sup>3</sup>                               |                 |
| Absorption coefficient            | 4.242 mm <sup>-1</sup>                                |                 |
| F(000)                            | 1656                                                  |                 |
| Crystal size                      | 0.540 x 0.430 x 0.320 mm <sup>3</sup>                 |                 |
| Theta range for data collection   | 3.538 to 29.517°.                                     |                 |
| Index ranges                      | -14 ≤ h ≤ 15, -24 ≤ k ≤ 24, -24 ≤ l ≤ 23              |                 |
| Reflections collected             | 24406                                                 |                 |
| Independent reflections           | 8582 [R(int) = 0.0463]                                |                 |
| Completeness to theta = 25.242°   | 99.8 %                                                |                 |
| Absorption correction             | Analytical                                            |                 |
| Max. and min. transmission        | 0.153 and 0.069                                       |                 |
| Refinement method                 | Full-matrix least-squares on F <sup>2</sup>           |                 |
| Data / restraints / parameters    | 8582 / 0 / 403                                        |                 |
| Goodness-of-fit on F <sup>2</sup> | 1.102                                                 |                 |
| Final R indices [I > 2σ(I)]       | R1 = 0.0348, wR2 = 0.0770                             |                 |
| R indices (all data)              | R1 = 0.0498, wR2 = 0.0876                             |                 |
| Extinction coefficient            | n/a                                                   |                 |
| Largest diff. peak and hole       | 2.507 and -1.068 e.Å <sup>-3</sup>                    |                 |



Table S34. Atomic coordinates ( $\times 10^4$ ) and equivalent isotropic displacement parameters ( $\text{\AA}^2 \times 10^3$ ) for cldr03. U(eq) is defined as one third of the trace of the orthogonalized  $U^{ij}$  tensor.

|       | x       | y       | z       | U(eq) |
|-------|---------|---------|---------|-------|
| Au(1) | 5469(1) | 4038(1) | 2432(1) | 20(1) |
| S(1)  | 4758(1) | 5131(1) | 1877(1) | 29(1) |
| P(1)  | 6140(1) | 2998(1) | 3065(1) | 19(1) |
| F(1)  | 5525(3) | 6934(2) | -135(2) | 53(1) |
| F(2)  | 7611(2) | 4682(2) | -76(2)  | 49(1) |
| C(1)  | 5531(4) | 5373(2) | 1128(2) | 23(1) |
| C(2)  | 5273(4) | 6065(2) | 801(2)  | 29(1) |
| C(3)  | 5814(4) | 6264(2) | 192(2)  | 33(1) |
| C(4)  | 6614(4) | 5822(3) | -125(2) | 33(1) |
| C(5)  | 6841(4) | 5149(3) | 217(2)  | 32(1) |
| C(6)  | 6348(3) | 4915(3) | 832(2)  | 27(1) |
| C(7)  | 6255(3) | 2200(2) | 2436(2) | 22(1) |
| C(8)  | 6641(4) | 2436(2) | 1683(2) | 29(1) |
| C(9)  | 6604(4) | 1778(3) | 1144(2) | 33(1) |
| C(10) | 7393(4) | 1141(3) | 1498(3) | 37(1) |
| C(11) | 6992(4) | 903(2)  | 2236(3) | 33(1) |
| C(12) | 7034(4) | 1553(2) | 2785(2) | 27(1) |
| C(13) | 7613(3) | 3149(2) | 3649(2) | 22(1) |
| C(14) | 8589(4) | 3404(3) | 3182(2) | 31(1) |
| C(15) | 9791(4) | 3550(3) | 3684(3) | 36(1) |
| C(16) | 9644(4) | 4105(3) | 4299(3) | 36(1) |
| C(17) | 8678(4) | 3856(3) | 4760(2) | 31(1) |
| C(18) | 7476(3) | 3723(2) | 4260(2) | 25(1) |
| C(19) | 5179(3) | 2656(2) | 3741(2) | 18(1) |
| C(20) | 5696(3) | 2182(2) | 4323(2) | 20(1) |
| C(21) | 5012(4) | 1891(2) | 4831(2) | 24(1) |
| C(22) | 3788(3) | 2056(2) | 4773(2) | 23(1) |
| C(23) | 3273(3) | 2520(2) | 4211(2) | 24(1) |
| C(24) | 3941(3) | 2836(2) | 3686(2) | 18(1) |
| C(25) | 3272(3) | 3352(2) | 3116(2) | 17(1) |
| C(26) | 3191(3) | 4106(2) | 3282(2) | 17(1) |
| C(27) | 2449(3) | 4557(2) | 2779(2) | 19(1) |
| C(28) | 1806(3) | 4282(2) | 2112(2) | 18(1) |
| C(29) | 1926(3) | 3540(2) | 1959(2) | 21(1) |
| C(30) | 2636(3) | 3063(2) | 2452(2) | 20(1) |
| C(31) | 3809(3) | 4433(2) | 4015(2) | 20(1) |
| C(32) | 2930(4) | 4428(3) | 4593(2) | 32(1) |
| C(33) | 4294(4) | 5211(2) | 3939(2) | 30(1) |
| C(34) | 963(3)  | 4759(2) | 1572(2) | 22(1) |
| C(35) | -357(4) | 4533(3) | 1595(3) | 33(1) |
| C(36) | 1120(4) | 5586(2) | 1705(3) | 32(1) |
| C(37) | 2625(4) | 2243(2) | 2266(2) | 24(1) |
| C(38) | 1408(4) | 1908(2) | 2385(3) | 36(1) |
| C(39) | 2897(4) | 2085(2) | 1472(2) | 29(1) |

Table S35. Bond lengths [Å] and angles [°] for cldr03.

---

|              |            |
|--------------|------------|
| Au(1)-P(1)   | 2.2698(10) |
| Au(1)-S(1)   | 2.3005(10) |
| S(1)-C(1)    | 1.755(4)   |
| P(1)-C(13)   | 1.838(4)   |
| P(1)-C(19)   | 1.839(4)   |
| P(1)-C(7)    | 1.847(4)   |
| F(1)-C(3)    | 1.363(5)   |
| F(2)-C(5)    | 1.364(5)   |
| C(1)-C(6)    | 1.392(6)   |
| C(1)-C(2)    | 1.394(6)   |
| C(2)-C(3)    | 1.371(6)   |
| C(2)-H(2)    | 0.9500     |
| C(3)-C(4)    | 1.381(7)   |
| C(4)-C(5)    | 1.369(7)   |
| C(4)-H(4)    | 0.9500     |
| C(5)-C(6)    | 1.370(6)   |
| C(6)-H(6)    | 0.9500     |
| C(7)-C(12)   | 1.537(6)   |
| C(7)-C(8)    | 1.539(5)   |
| C(7)-H(7)    | 1.0000     |
| C(8)-C(9)    | 1.531(6)   |
| C(8)-H(8A)   | 0.9900     |
| C(8)-H(8B)   | 0.9900     |
| C(9)-C(10)   | 1.531(6)   |
| C(9)-H(9A)   | 0.9900     |
| C(9)-H(9B)   | 0.9900     |
| C(10)-C(11)  | 1.521(6)   |
| C(10)-H(10A) | 0.9900     |
| C(10)-H(10B) | 0.9900     |
| C(11)-C(12)  | 1.531(6)   |
| C(11)-H(11A) | 0.9900     |
| C(11)-H(11B) | 0.9900     |
| C(12)-H(12A) | 0.9900     |
| C(12)-H(12B) | 0.9900     |
| C(13)-C(18)  | 1.534(5)   |
| C(13)-C(14)  | 1.538(5)   |
| C(13)-H(13)  | 1.0000     |
| C(14)-C(15)  | 1.528(6)   |
| C(14)-H(14A) | 0.9900     |
| C(14)-H(14B) | 0.9900     |
| C(15)-C(16)  | 1.521(7)   |
| C(15)-H(15A) | 0.9900     |
| C(15)-H(15B) | 0.9900     |
| C(16)-C(17)  | 1.518(6)   |
| C(16)-H(16A) | 0.9900     |
| C(16)-H(16B) | 0.9900     |
| C(17)-C(18)  | 1.521(6)   |

|              |          |
|--------------|----------|
| C(17)-H(17A) | 0.9900   |
| C(17)-H(17B) | 0.9900   |
| C(18)-H(18A) | 0.9900   |
| C(18)-H(18B) | 0.9900   |
| C(19)-C(24)  | 1.408(5) |
| C(19)-C(20)  | 1.411(5) |
| C(20)-C(21)  | 1.376(5) |
| C(20)-H(20)  | 0.9500   |
| C(21)-C(22)  | 1.386(5) |
| C(21)-H(21)  | 0.9500   |
| C(22)-C(23)  | 1.375(5) |
| C(22)-H(22)  | 0.9500   |
| C(23)-C(24)  | 1.405(5) |
| C(23)-H(23)  | 0.9500   |
| C(24)-C(25)  | 1.501(5) |
| C(25)-C(30)  | 1.400(5) |
| C(25)-C(26)  | 1.402(5) |
| C(26)-C(27)  | 1.397(5) |
| C(26)-C(31)  | 1.516(5) |
| C(27)-C(28)  | 1.397(5) |
| C(27)-H(27)  | 0.9500   |
| C(28)-C(29)  | 1.379(5) |
| C(28)-C(34)  | 1.519(5) |
| C(29)-C(30)  | 1.397(5) |
| C(29)-H(29)  | 0.9500   |
| C(30)-C(37)  | 1.520(5) |
| C(31)-C(33)  | 1.520(6) |
| C(31)-C(32)  | 1.527(5) |
| C(31)-H(31)  | 1.0000   |
| C(32)-H(32A) | 0.9800   |
| C(32)-H(32B) | 0.9800   |
| C(32)-H(32C) | 0.9800   |
| C(33)-H(33A) | 0.9800   |
| C(33)-H(33B) | 0.9800   |
| C(33)-H(33C) | 0.9800   |
| C(34)-C(36)  | 1.519(6) |
| C(34)-C(35)  | 1.533(6) |
| C(34)-H(34)  | 1.0000   |
| C(35)-H(35A) | 0.9800   |
| C(35)-H(35B) | 0.9800   |
| C(35)-H(35C) | 0.9800   |
| C(36)-H(36A) | 0.9800   |
| C(36)-H(36B) | 0.9800   |
| C(36)-H(36C) | 0.9800   |
| C(37)-C(38)  | 1.529(6) |
| C(37)-C(39)  | 1.529(5) |
| C(37)-H(37)  | 1.0000   |
| C(38)-H(38A) | 0.9800   |
| C(38)-H(38B) | 0.9800   |

|                  |            |
|------------------|------------|
| C(38)-H(38C)     | 0.9800     |
| C(39)-H(39A)     | 0.9800     |
| C(39)-H(39B)     | 0.9800     |
| C(39)-H(39C)     | 0.9800     |
| P(1)-Au(1)-S(1)  | 175.54(4)  |
| C(1)-S(1)-Au(1)  | 111.73(14) |
| C(13)-P(1)-C(19) | 103.35(17) |
| C(13)-P(1)-C(7)  | 109.33(17) |
| C(19)-P(1)-C(7)  | 103.92(17) |
| C(13)-P(1)-Au(1) | 111.48(13) |
| C(19)-P(1)-Au(1) | 115.35(12) |
| C(7)-P(1)-Au(1)  | 112.72(13) |
| C(6)-C(1)-C(2)   | 118.6(4)   |
| C(6)-C(1)-S(1)   | 124.4(3)   |
| C(2)-C(1)-S(1)   | 117.0(3)   |
| C(3)-C(2)-C(1)   | 119.0(4)   |
| C(3)-C(2)-H(2)   | 120.5      |
| C(1)-C(2)-H(2)   | 120.5      |
| F(1)-C(3)-C(2)   | 118.2(4)   |
| F(1)-C(3)-C(4)   | 117.6(4)   |
| C(2)-C(3)-C(4)   | 124.2(4)   |
| C(5)-C(4)-C(3)   | 114.7(4)   |
| C(5)-C(4)-H(4)   | 122.7      |
| C(3)-C(4)-H(4)   | 122.7      |
| F(2)-C(5)-C(4)   | 117.5(4)   |
| F(2)-C(5)-C(6)   | 117.9(4)   |
| C(4)-C(5)-C(6)   | 124.5(4)   |
| C(5)-C(6)-C(1)   | 119.1(4)   |
| C(5)-C(6)-H(6)   | 120.5      |
| C(1)-C(6)-H(6)   | 120.5      |
| C(12)-C(7)-C(8)  | 110.9(3)   |
| C(12)-C(7)-P(1)  | 115.4(3)   |
| C(8)-C(7)-P(1)   | 112.0(3)   |
| C(12)-C(7)-H(7)  | 105.9      |
| C(8)-C(7)-H(7)   | 105.9      |
| P(1)-C(7)-H(7)   | 105.9      |
| C(9)-C(8)-C(7)   | 110.8(4)   |
| C(9)-C(8)-H(8A)  | 109.5      |
| C(7)-C(8)-H(8A)  | 109.5      |
| C(9)-C(8)-H(8B)  | 109.5      |
| C(7)-C(8)-H(8B)  | 109.5      |
| H(8A)-C(8)-H(8B) | 108.1      |
| C(8)-C(9)-C(10)  | 111.1(4)   |
| C(8)-C(9)-H(9A)  | 109.4      |
| C(10)-C(9)-H(9A) | 109.4      |
| C(8)-C(9)-H(9B)  | 109.4      |
| C(10)-C(9)-H(9B) | 109.4      |
| H(9A)-C(9)-H(9B) | 108.0      |

|                     |          |
|---------------------|----------|
| C(11)-C(10)-C(9)    | 110.6(4) |
| C(11)-C(10)-H(10A)  | 109.5    |
| C(9)-C(10)-H(10A)   | 109.5    |
| C(11)-C(10)-H(10B)  | 109.5    |
| C(9)-C(10)-H(10B)   | 109.5    |
| H(10A)-C(10)-H(10B) | 108.1    |
| C(10)-C(11)-C(12)   | 111.1(4) |
| C(10)-C(11)-H(11A)  | 109.4    |
| C(12)-C(11)-H(11A)  | 109.4    |
| C(10)-C(11)-H(11B)  | 109.4    |
| C(12)-C(11)-H(11B)  | 109.4    |
| H(11A)-C(11)-H(11B) | 108.0    |
| C(11)-C(12)-C(7)    | 110.9(3) |
| C(11)-C(12)-H(12A)  | 109.5    |
| C(7)-C(12)-H(12A)   | 109.4    |
| C(11)-C(12)-H(12B)  | 109.4    |
| C(7)-C(12)-H(12B)   | 109.4    |
| H(12A)-C(12)-H(12B) | 108.0    |
| C(18)-C(13)-C(14)   | 109.8(3) |
| C(18)-C(13)-P(1)    | 109.7(3) |
| C(14)-C(13)-P(1)    | 112.1(3) |
| C(18)-C(13)-H(13)   | 108.4    |
| C(14)-C(13)-H(13)   | 108.4    |
| P(1)-C(13)-H(13)    | 108.4    |
| C(15)-C(14)-C(13)   | 111.0(3) |
| C(15)-C(14)-H(14A)  | 109.4    |
| C(13)-C(14)-H(14A)  | 109.4    |
| C(15)-C(14)-H(14B)  | 109.4    |
| C(13)-C(14)-H(14B)  | 109.4    |
| H(14A)-C(14)-H(14B) | 108.0    |
| C(16)-C(15)-C(14)   | 111.5(4) |
| C(16)-C(15)-H(15A)  | 109.3    |
| C(14)-C(15)-H(15A)  | 109.3    |
| C(16)-C(15)-H(15B)  | 109.3    |
| C(14)-C(15)-H(15B)  | 109.3    |
| H(15A)-C(15)-H(15B) | 108.0    |
| C(17)-C(16)-C(15)   | 111.1(4) |
| C(17)-C(16)-H(16A)  | 109.4    |
| C(15)-C(16)-H(16A)  | 109.4    |
| C(17)-C(16)-H(16B)  | 109.4    |
| C(15)-C(16)-H(16B)  | 109.4    |
| H(16A)-C(16)-H(16B) | 108.0    |
| C(16)-C(17)-C(18)   | 111.0(4) |
| C(16)-C(17)-H(17A)  | 109.4    |
| C(18)-C(17)-H(17A)  | 109.4    |
| C(16)-C(17)-H(17B)  | 109.4    |
| C(18)-C(17)-H(17B)  | 109.4    |
| H(17A)-C(17)-H(17B) | 108.0    |
| C(17)-C(18)-C(13)   | 111.1(3) |

|                     |          |
|---------------------|----------|
| C(17)-C(18)-H(18A)  | 109.4    |
| C(13)-C(18)-H(18A)  | 109.4    |
| C(17)-C(18)-H(18B)  | 109.4    |
| C(13)-C(18)-H(18B)  | 109.4    |
| H(18A)-C(18)-H(18B) | 108.0    |
| C(24)-C(19)-C(20)   | 119.0(3) |
| C(24)-C(19)-P(1)    | 122.4(3) |
| C(20)-C(19)-P(1)    | 118.6(3) |
| C(21)-C(20)-C(19)   | 121.2(3) |
| C(21)-C(20)-H(20)   | 119.4    |
| C(19)-C(20)-H(20)   | 119.4    |
| C(20)-C(21)-C(22)   | 120.2(4) |
| C(20)-C(21)-H(21)   | 119.9    |
| C(22)-C(21)-H(21)   | 119.9    |
| C(23)-C(22)-C(21)   | 119.3(3) |
| C(23)-C(22)-H(22)   | 120.4    |
| C(21)-C(22)-H(22)   | 120.4    |
| C(22)-C(23)-C(24)   | 122.4(4) |
| C(22)-C(23)-H(23)   | 118.8    |
| C(24)-C(23)-H(23)   | 118.8    |
| C(23)-C(24)-C(19)   | 117.9(3) |
| C(23)-C(24)-C(25)   | 116.8(3) |
| C(19)-C(24)-C(25)   | 125.2(3) |
| C(30)-C(25)-C(26)   | 120.3(3) |
| C(30)-C(25)-C(24)   | 119.5(3) |
| C(26)-C(25)-C(24)   | 120.0(3) |
| C(27)-C(26)-C(25)   | 118.7(3) |
| C(27)-C(26)-C(31)   | 119.3(3) |
| C(25)-C(26)-C(31)   | 121.9(3) |
| C(26)-C(27)-C(28)   | 122.1(4) |
| C(26)-C(27)-H(27)   | 119.0    |
| C(28)-C(27)-H(27)   | 119.0    |
| C(29)-C(28)-C(27)   | 117.7(3) |
| C(29)-C(28)-C(34)   | 119.6(3) |
| C(27)-C(28)-C(34)   | 122.7(4) |
| C(28)-C(29)-C(30)   | 122.4(4) |
| C(28)-C(29)-H(29)   | 118.8    |
| C(30)-C(29)-H(29)   | 118.8    |
| C(29)-C(30)-C(25)   | 118.9(4) |
| C(29)-C(30)-C(37)   | 118.5(3) |
| C(25)-C(30)-C(37)   | 122.6(3) |
| C(26)-C(31)-C(33)   | 113.9(3) |
| C(26)-C(31)-C(32)   | 109.4(3) |
| C(33)-C(31)-C(32)   | 109.8(3) |
| C(26)-C(31)-H(31)   | 107.9    |
| C(33)-C(31)-H(31)   | 107.9    |
| C(32)-C(31)-H(31)   | 107.9    |
| C(31)-C(32)-H(32A)  | 109.5    |
| C(31)-C(32)-H(32B)  | 109.5    |

|                     |          |
|---------------------|----------|
| H(32A)-C(32)-H(32B) | 109.5    |
| C(31)-C(32)-H(32C)  | 109.5    |
| H(32A)-C(32)-H(32C) | 109.5    |
| H(32B)-C(32)-H(32C) | 109.5    |
| C(31)-C(33)-H(33A)  | 109.5    |
| C(31)-C(33)-H(33B)  | 109.5    |
| H(33A)-C(33)-H(33B) | 109.5    |
| C(31)-C(33)-H(33C)  | 109.5    |
| H(33A)-C(33)-H(33C) | 109.5    |
| H(33B)-C(33)-H(33C) | 109.5    |
| C(28)-C(34)-C(36)   | 114.3(3) |
| C(28)-C(34)-C(35)   | 109.9(3) |
| C(36)-C(34)-C(35)   | 110.3(3) |
| C(28)-C(34)-H(34)   | 107.4    |
| C(36)-C(34)-H(34)   | 107.4    |
| C(35)-C(34)-H(34)   | 107.4    |
| C(34)-C(35)-H(35A)  | 109.5    |
| C(34)-C(35)-H(35B)  | 109.5    |
| H(35A)-C(35)-H(35B) | 109.5    |
| C(34)-C(35)-H(35C)  | 109.5    |
| H(35A)-C(35)-H(35C) | 109.5    |
| H(35B)-C(35)-H(35C) | 109.5    |
| C(34)-C(36)-H(36A)  | 109.5    |
| C(34)-C(36)-H(36B)  | 109.5    |
| H(36A)-C(36)-H(36B) | 109.5    |
| C(34)-C(36)-H(36C)  | 109.5    |
| H(36A)-C(36)-H(36C) | 109.5    |
| H(36B)-C(36)-H(36C) | 109.5    |
| C(30)-C(37)-C(38)   | 109.6(3) |
| C(30)-C(37)-C(39)   | 113.0(3) |
| C(38)-C(37)-C(39)   | 110.9(3) |
| C(30)-C(37)-H(37)   | 107.7    |
| C(38)-C(37)-H(37)   | 107.7    |
| C(39)-C(37)-H(37)   | 107.7    |
| C(37)-C(38)-H(38A)  | 109.5    |
| C(37)-C(38)-H(38B)  | 109.5    |
| H(38A)-C(38)-H(38B) | 109.5    |
| C(37)-C(38)-H(38C)  | 109.5    |
| H(38A)-C(38)-H(38C) | 109.5    |
| H(38B)-C(38)-H(38C) | 109.5    |
| C(37)-C(39)-H(39A)  | 109.5    |
| C(37)-C(39)-H(39B)  | 109.5    |
| H(39A)-C(39)-H(39B) | 109.5    |
| C(37)-C(39)-H(39C)  | 109.5    |
| H(39A)-C(39)-H(39C) | 109.5    |
| H(39B)-C(39)-H(39C) | 109.5    |

---

Table S36. Anisotropic displacement parameters ( $\text{\AA}^2 \times 10^3$ ) for cldr03. The anisotropic displacement factor exponent takes the form:  $-2\pi^2 [h^2 a^{*2} U^{11} + \dots + 2 h k a^* b^* U^{12}]$

|       | U <sup>11</sup> | U <sup>22</sup> | U <sup>33</sup> | U <sup>23</sup> | U <sup>13</sup> | U <sup>12</sup> |
|-------|-----------------|-----------------|-----------------|-----------------|-----------------|-----------------|
| Au(1) | 21(1)           | 19(1)           | 22(1)           | 5(1)            | 4(1)            | 2(1)            |
| S(1)  | 35(1)           | 23(1)           | 30(1)           | 9(1)            | 12(1)           | 11(1)           |
| P(1)  | 17(1)           | 18(1)           | 21(1)           | 3(1)            | 2(1)            | 1(1)            |
| F(1)  | 92(2)           | 26(2)           | 41(2)           | 16(1)           | 12(2)           | -3(2)           |
| F(2)  | 44(2)           | 68(2)           | 40(2)           | 9(2)            | 21(1)           | 15(2)           |
| C(1)  | 28(2)           | 22(2)           | 20(2)           | 2(2)            | 2(2)            | -6(2)           |
| C(2)  | 39(2)           | 22(2)           | 24(2)           | 2(2)            | 1(2)            | 0(2)            |
| C(3)  | 43(3)           | 22(2)           | 29(2)           | 5(2)            | -4(2)           | -9(2)           |
| C(4)  | 36(2)           | 37(3)           | 24(2)           | 4(2)            | 3(2)            | -14(2)          |
| C(5)  | 22(2)           | 47(3)           | 27(2)           | 0(2)            | 3(2)            | -2(2)           |
| C(6)  | 25(2)           | 28(2)           | 29(2)           | 3(2)            | 5(2)            | 1(2)            |
| C(7)  | 19(2)           | 20(2)           | 24(2)           | -1(2)           | 0(2)            | 0(2)            |
| C(8)  | 37(2)           | 25(2)           | 24(2)           | 4(2)            | 7(2)            | 2(2)            |
| C(9)  | 41(2)           | 35(3)           | 25(2)           | -6(2)           | 7(2)            | 3(2)            |
| C(10) | 42(3)           | 35(3)           | 35(3)           | -6(2)           | 11(2)           | 6(2)            |
| C(11) | 40(3)           | 24(2)           | 35(3)           | 0(2)            | 6(2)            | 9(2)            |
| C(12) | 32(2)           | 25(2)           | 25(2)           | 0(2)            | 3(2)            | 4(2)            |
| C(13) | 18(2)           | 20(2)           | 27(2)           | 2(2)            | 2(2)            | -1(2)           |
| C(14) | 26(2)           | 38(3)           | 30(2)           | 6(2)            | 4(2)            | -2(2)           |
| C(15) | 20(2)           | 45(3)           | 42(3)           | 8(2)            | 3(2)            | -4(2)           |
| C(16) | 24(2)           | 37(3)           | 45(3)           | 3(2)            | -3(2)           | -9(2)           |
| C(17) | 26(2)           | 31(2)           | 33(2)           | -5(2)           | -2(2)           | 0(2)            |
| C(18) | 23(2)           | 19(2)           | 33(2)           | -4(2)           | 2(2)            | 0(2)            |
| C(19) | 20(2)           | 13(2)           | 21(2)           | 2(2)            | 3(2)            | -1(2)           |
| C(20) | 22(2)           | 18(2)           | 19(2)           | 0(2)            | -3(2)           | 1(2)            |
| C(21) | 30(2)           | 20(2)           | 20(2)           | 2(2)            | -2(2)           | 1(2)            |
| C(22) | 30(2)           | 22(2)           | 19(2)           | 5(2)            | 7(2)            | -2(2)           |
| C(23) | 22(2)           | 23(2)           | 26(2)           | 4(2)            | 5(2)            | 0(2)            |
| C(24) | 21(2)           | 14(2)           | 18(2)           | -3(1)           | 3(1)            | 0(2)            |
| C(25) | 17(2)           | 18(2)           | 18(2)           | 2(2)            | 3(1)            | -2(2)           |
| C(26) | 15(2)           | 19(2)           | 18(2)           | -3(1)           | 5(1)            | -2(2)           |
| C(27) | 19(2)           | 13(2)           | 25(2)           | -1(2)           | 2(2)            | -1(2)           |
| C(28) | 18(2)           | 15(2)           | 22(2)           | 3(2)            | 3(2)            | -3(2)           |
| C(29) | 24(2)           | 20(2)           | 20(2)           | 1(2)            | 1(2)            | -2(2)           |
| C(30) | 22(2)           | 16(2)           | 22(2)           | 1(2)            | 3(2)            | -1(2)           |
| C(31) | 21(2)           | 14(2)           | 23(2)           | -2(2)           | 0(2)            | 1(2)            |
| C(32) | 30(2)           | 35(3)           | 32(2)           | -8(2)           | 9(2)            | -6(2)           |
| C(33) | 34(2)           | 29(2)           | 25(2)           | -1(2)           | -2(2)           | -6(2)           |
| C(34) | 21(2)           | 21(2)           | 24(2)           | 2(2)            | -1(2)           | 5(2)            |
| C(35) | 23(2)           | 31(3)           | 43(3)           | 2(2)            | -4(2)           | 4(2)            |
| C(36) | 33(2)           | 21(2)           | 40(3)           | 8(2)            | -3(2)           | 3(2)            |
| C(37) | 27(2)           | 17(2)           | 27(2)           | -4(2)           | 0(2)            | 1(2)            |
| C(38) | 44(3)           | 20(2)           | 46(3)           | -6(2)           | 14(2)           | -11(2)          |
| C(39) | 35(2)           | 24(2)           | 28(2)           | -2(2)           | 2(2)            | 2(2)            |



---

Table S37. Torsion angles [°] for cldr03.

|                         |           |
|-------------------------|-----------|
| Au(1)-S(1)-C(1)-C(6)    | 8.7(4)    |
| Au(1)-S(1)-C(1)-C(2)    | -173.1(3) |
| C(6)-C(1)-C(2)-C(3)     | 1.2(6)    |
| S(1)-C(1)-C(2)-C(3)     | -177.1(3) |
| C(1)-C(2)-C(3)-F(1)     | 178.2(4)  |
| C(1)-C(2)-C(3)-C(4)     | -0.2(7)   |
| F(1)-C(3)-C(4)-C(5)     | -178.4(4) |
| C(2)-C(3)-C(4)-C(5)     | 0.0(7)    |
| C(3)-C(4)-C(5)-F(2)     | 179.0(4)  |
| C(3)-C(4)-C(5)-C(6)     | -0.8(7)   |
| F(2)-C(5)-C(6)-C(1)     | -178.0(4) |
| C(4)-C(5)-C(6)-C(1)     | 1.8(7)    |
| C(2)-C(1)-C(6)-C(5)     | -1.9(6)   |
| S(1)-C(1)-C(6)-C(5)     | 176.2(3)  |
| C(13)-P(1)-C(7)-C(12)   | 38.4(3)   |
| C(19)-P(1)-C(7)-C(12)   | -71.4(3)  |
| Au(1)-P(1)-C(7)-C(12)   | 163.0(2)  |
| C(13)-P(1)-C(7)-C(8)    | -89.8(3)  |
| C(19)-P(1)-C(7)-C(8)    | 160.4(3)  |
| Au(1)-P(1)-C(7)-C(8)    | 34.8(3)   |
| C(12)-C(7)-C(8)-C(9)    | 55.2(4)   |
| P(1)-C(7)-C(8)-C(9)     | -174.3(3) |
| C(7)-C(8)-C(9)-C(10)    | -56.2(5)  |
| C(8)-C(9)-C(10)-C(11)   | 57.2(5)   |
| C(9)-C(10)-C(11)-C(12)  | -57.2(5)  |
| C(10)-C(11)-C(12)-C(7)  | 56.6(5)   |
| C(8)-C(7)-C(12)-C(11)   | -55.3(4)  |
| P(1)-C(7)-C(12)-C(11)   | 175.9(3)  |
| C(19)-P(1)-C(13)-C(18)  | -60.5(3)  |
| C(7)-P(1)-C(13)-C(18)   | -170.7(3) |
| Au(1)-P(1)-C(13)-C(18)  | 63.9(3)   |
| C(19)-P(1)-C(13)-C(14)  | 177.2(3)  |
| C(7)-P(1)-C(13)-C(14)   | 67.0(3)   |
| Au(1)-P(1)-C(13)-C(14)  | -58.3(3)  |
| C(18)-C(13)-C(14)-C(15) | 56.0(5)   |
| P(1)-C(13)-C(14)-C(15)  | 178.2(3)  |
| C(13)-C(14)-C(15)-C(16) | -55.7(5)  |
| C(14)-C(15)-C(16)-C(17) | 55.4(5)   |
| C(15)-C(16)-C(17)-C(18) | -56.2(5)  |
| C(16)-C(17)-C(18)-C(13) | 57.4(5)   |
| C(14)-C(13)-C(18)-C(17) | -57.0(4)  |
| P(1)-C(13)-C(18)-C(17)  | 179.4(3)  |
| C(13)-P(1)-C(19)-C(24)  | 144.4(3)  |
| C(7)-P(1)-C(19)-C(24)   | -101.4(3) |
| Au(1)-P(1)-C(19)-C(24)  | 22.5(4)   |
| C(13)-P(1)-C(19)-C(20)  | -37.2(3)  |
| C(7)-P(1)-C(19)-C(20)   | 77.0(3)   |

|                         |           |
|-------------------------|-----------|
| Au(1)-P(1)-C(19)-C(20)  | -159.1(3) |
| C(24)-C(19)-C(20)-C(21) | 0.4(6)    |
| P(1)-C(19)-C(20)-C(21)  | -178.0(3) |
| C(19)-C(20)-C(21)-C(22) | 0.7(6)    |
| C(20)-C(21)-C(22)-C(23) | -1.0(6)   |
| C(21)-C(22)-C(23)-C(24) | 0.3(6)    |
| C(22)-C(23)-C(24)-C(19) | 0.9(6)    |
| C(22)-C(23)-C(24)-C(25) | -178.2(4) |
| C(20)-C(19)-C(24)-C(23) | -1.2(5)   |
| P(1)-C(19)-C(24)-C(23)  | 177.2(3)  |
| C(20)-C(19)-C(24)-C(25) | 177.8(3)  |
| P(1)-C(19)-C(24)-C(25)  | -3.8(5)   |
| C(23)-C(24)-C(25)-C(30) | -86.1(4)  |
| C(19)-C(24)-C(25)-C(30) | 94.9(5)   |
| C(23)-C(24)-C(25)-C(26) | 87.8(4)   |
| C(19)-C(24)-C(25)-C(26) | -91.2(5)  |
| C(30)-C(25)-C(26)-C(27) | 1.1(5)    |
| C(24)-C(25)-C(26)-C(27) | -172.7(3) |
| C(30)-C(25)-C(26)-C(31) | 176.6(3)  |
| C(24)-C(25)-C(26)-C(31) | 2.8(5)    |
| C(25)-C(26)-C(27)-C(28) | -1.1(5)   |
| C(31)-C(26)-C(27)-C(28) | -176.8(3) |
| C(26)-C(27)-C(28)-C(29) | -0.2(5)   |
| C(26)-C(27)-C(28)-C(34) | 177.9(3)  |
| C(27)-C(28)-C(29)-C(30) | 1.6(5)    |
| C(34)-C(28)-C(29)-C(30) | -176.5(3) |
| C(28)-C(29)-C(30)-C(25) | -1.6(5)   |
| C(28)-C(29)-C(30)-C(37) | 174.7(3)  |
| C(26)-C(25)-C(30)-C(29) | 0.2(5)    |
| C(24)-C(25)-C(30)-C(29) | 174.1(3)  |
| C(26)-C(25)-C(30)-C(37) | -175.9(3) |
| C(24)-C(25)-C(30)-C(37) | -2.1(5)   |
| C(27)-C(26)-C(31)-C(33) | -40.0(5)  |
| C(25)-C(26)-C(31)-C(33) | 144.5(4)  |
| C(27)-C(26)-C(31)-C(32) | 83.2(4)   |
| C(25)-C(26)-C(31)-C(32) | -92.3(4)  |
| C(29)-C(28)-C(34)-C(36) | -166.9(3) |
| C(27)-C(28)-C(34)-C(36) | 15.1(5)   |
| C(29)-C(28)-C(34)-C(35) | 68.5(4)   |
| C(27)-C(28)-C(34)-C(35) | -109.5(4) |
| C(29)-C(30)-C(37)-C(38) | -71.7(5)  |
| C(25)-C(30)-C(37)-C(38) | 104.5(4)  |
| C(29)-C(30)-C(37)-C(39) | 52.5(5)   |
| C(25)-C(30)-C(37)-C(39) | -131.3(4) |

---

## Compound 12

Table S38. Crystal data and structure refinement for au601.

|                                   |                                                       |                              |
|-----------------------------------|-------------------------------------------------------|------------------------------|
| Identification code               | au601                                                 |                              |
| Empirical formula                 | C <sub>34</sub> H <sub>49</sub> Au F <sub>3</sub> P S |                              |
| Formula weight                    | 774.73                                                |                              |
| Temperature                       | 130(2) K                                              |                              |
| Wavelength                        | 0.71073 Å                                             |                              |
| Crystal system                    | Triclinic                                             |                              |
| Space group                       | P -1                                                  |                              |
| Unit cell dimensions              | a = 9.2691(5) Å                                       | $\alpha = 86.078(4)^\circ$ . |
|                                   | b = 19.1597(8) Å                                      | $\beta = 76.950(5)^\circ$ .  |
|                                   | c = 19.6184(10) Å                                     | $\gamma = 88.752(4)^\circ$ . |
| Volume                            | 3386.1(3) Å <sup>3</sup>                              |                              |
| Z                                 | 4                                                     |                              |
| Density (calculated)              | 1.520 Mg/m <sup>3</sup>                               |                              |
| Absorption coefficient            | 4.491 mm <sup>-1</sup>                                |                              |
| F(000)                            | 1560                                                  |                              |
| Crystal size                      | 0.552 x 0.218 x 0.163 mm <sup>3</sup>                 |                              |
| Theta range for data collection   | 3.373 to 29.544°.                                     |                              |
| Index ranges                      | -12 ≤ h ≤ 12, -23 ≤ k ≤ 24, -27 ≤ l ≤ 21              |                              |
| Reflections collected             | 30066                                                 |                              |
| Independent reflections           | 15838 [R(int) = 0.0332]                               |                              |
| Completeness to theta = 25.242°   | 99.7 %                                                |                              |
| Absorption correction             | Analytical                                            |                              |
| Max. and min. transmission        | 0.535 and 0.347                                       |                              |
| Refinement method                 | Full-matrix least-squares on F <sup>2</sup>           |                              |
| Data / restraints / parameters    | 15838 / 55 / 734                                      |                              |
| Goodness-of-fit on F <sup>2</sup> | 1.026                                                 |                              |
| Final R indices [I > 2σ(I)]       | R1 = 0.0373, wR2 = 0.0746                             |                              |
| R indices (all data)              | R1 = 0.0574, wR2 = 0.0845                             |                              |
| Extinction coefficient            | n/a                                                   |                              |
| Largest diff. peak and hole       | 1.973 and -1.623 e.Å <sup>-3</sup>                    |                              |

Table S39. Atomic coordinates ( $\times 10^4$ ) and equivalent isotropic displacement parameters ( $\text{\AA}^2 \times 10^3$ ) for au601. U(eq) is defined as one third of the trace of the orthogonalized  $U^{ij}$  tensor.

|        | x        | y       | z       | U(eq) |
|--------|----------|---------|---------|-------|
| Au(1)  | 8482(1)  | 2434(1) | 3012(1) | 26(1) |
| S(1)   | 8107(2)  | 2710(1) | 1900(1) | 44(1) |
| P(1)   | 8911(1)  | 2208(1) | 4093(1) | 23(1) |
| F(1)   | 7186(5)  | 3841(2) | 1368(2) | 85(1) |
| F(2)   | 8196(3)  | 4013(2) | 2215(2) | 57(1) |
| F(3)   | 6058(3)  | 3597(2) | 2432(2) | 76(1) |
| C(6)   | 9831(5)  | 2951(2) | 4380(2) | 30(1) |
| C(7)   | 9358(5)  | 3653(2) | 4071(3) | 40(1) |
| C(8)   | 10002(6) | 4265(3) | 4378(3) | 54(2) |
| C(9)   | 11615(6) | 4227(3) | 4238(3) | 52(1) |
| C(10)  | 12135(6) | 3532(3) | 4530(3) | 52(1) |
| C(11)  | 11497(5) | 2922(3) | 4226(3) | 47(1) |
| C(12)  | 7247(4)  | 2048(2) | 4802(2) | 28(1) |
| C(13)  | 6196(5)  | 2680(2) | 4894(3) | 36(1) |
| C(14)  | 4842(5)  | 2514(3) | 5494(3) | 45(1) |
| C(15)  | 4047(5)  | 1866(3) | 5372(3) | 43(1) |
| C(16)  | 5100(5)  | 1244(3) | 5278(3) | 45(1) |
| C(17)  | 6450(5)  | 1398(2) | 4681(3) | 36(1) |
| C(18)  | 10080(4) | 1440(2) | 4179(2) | 23(1) |
| C(19)  | 10365(5) | 1268(2) | 4846(2) | 32(1) |
| C(20)  | 11300(5) | 720(2)  | 4951(2) | 34(1) |
| C(21)  | 11970(5) | 338(2)  | 4395(3) | 36(1) |
| C(22)  | 11685(4) | 492(2)  | 3746(2) | 30(1) |
| C(23)  | 10736(4) | 1040(2) | 3619(2) | 22(1) |
| C(24)  | 10508(4) | 1144(2) | 2884(2) | 21(1) |
| C(25)  | 9423(4)  | 757(2)  | 2683(2) | 23(1) |
| C(26)  | 9324(4)  | 809(2)  | 1984(2) | 24(1) |
| C(27)  | 10270(4) | 1224(2) | 1477(2) | 25(1) |
| C(28)  | 11341(4) | 1593(2) | 1690(2) | 24(1) |
| C(29)  | 11492(4) | 1566(2) | 2377(2) | 23(1) |
| C(30)  | 8406(4)  | 256(2)  | 3205(2) | 28(1) |
| C(31)  | 8970(6)  | -492(2) | 3116(2) | 43(1) |
| C(32)  | 6790(5)  | 319(3)  | 3138(3) | 48(1) |
| C(33)  | 10202(5) | 1267(2) | 708(2)  | 31(1) |
| C(34)  | 8755(6)  | 1027(3) | 579(3)  | 54(2) |
| C(35)  | 11507(7) | 885(4)  | 276(3)  | 66(2) |
| C(36)  | 12694(4) | 1978(2) | 2570(2) | 31(1) |
| C(37)  | 14210(5) | 1630(3) | 2314(3) | 45(1) |
| C(38)  | 12706(5) | 2746(2) | 2293(3) | 40(1) |
| C(39)  | 7368(5)  | 3549(3) | 1989(3) | 40(1) |
| Au(1A) | 6168(1)  | 3051(1) | 7519(1) | 34(1) |
| S(5)   | 7671(2)  | 2185(1) | 6964(1) | 58(1) |
| P(1A)  | 4855(1)  | 3983(1) | 7959(1) | 26(1) |
| F(1B)  | 10264(4) | 2335(2) | 6201(2) | 85(1) |

|        |          |          |          |       |
|--------|----------|----------|----------|-------|
| F(2B)  | 8912(4)  | 3253(2)  | 6182(2)  | 92(1) |
| F(3B)  | 9819(4)  | 2997(2)  | 7067(2)  | 86(1) |
| C(10B) | 8262(6)  | 5463(3)  | 8606(3)  | 50(1) |
| C(11B) | 6676(5)  | 5467(3)  | 9024(3)  | 50(1) |
| C(13B) | 4005(5)  | 4455(2)  | 7300(2)  | 36(1) |
| C(14B) | 5166(6)  | 4740(3)  | 6664(3)  | 51(1) |
| C(15B) | 4437(7)  | 5123(3)  | 6120(3)  | 60(2) |
| C(16B) | 3371(6)  | 4670(3)  | 5893(3)  | 56(2) |
| C(17B) | 2211(6)  | 4399(4)  | 6519(3)  | 69(2) |
| C(18B) | 2907(6)  | 3997(3)  | 7063(3)  | 48(1) |
| C(19B) | 3318(4)  | 3797(2)  | 8703(2)  | 24(1) |
| C(20B) | 2296(5)  | 4335(2)  | 8920(2)  | 33(1) |
| C(21B) | 1135(5)  | 4234(3)  | 9490(3)  | 38(1) |
| C(22B) | 960(4)   | 3606(3)  | 9872(2)  | 35(1) |
| C(23B) | 1944(4)  | 3070(2)  | 9670(2)  | 29(1) |
| C(24B) | 3126(4)  | 3147(2)  | 9087(2)  | 21(1) |
| C(25B) | 4044(4)  | 2500(2)  | 8916(2)  | 24(1) |
| C(26B) | 3588(4)  | 2010(2)  | 8513(2)  | 27(1) |
| C(27B) | 4291(5)  | 1358(2)  | 8467(2)  | 37(1) |
| C(28B) | 5416(5)  | 1180(2)  | 8808(3)  | 35(1) |
| C(29B) | 5886(5)  | 1681(2)  | 9173(3)  | 35(1) |
| C(30B) | 5226(4)  | 2339(2)  | 9243(2)  | 28(1) |
| C(31B) | 2341(5)  | 2168(2)  | 8137(2)  | 32(1) |
| C(32B) | 923(5)   | 1767(3)  | 8485(2)  | 36(1) |
| C(33B) | 2836(6)  | 2017(3)  | 7365(2)  | 43(1) |
| C(34B) | 6124(6)  | 458(3)   | 8772(3)  | 46(1) |
| C(35B) | 5011(6)  | -119(3)  | 8996(3)  | 52(1) |
| C(36B) | 7115(7)  | 364(3)   | 8061(3)  | 72(2) |
| C(37B) | 5764(4)  | 2848(2)  | 9683(2)  | 33(1) |
| C(38B) | 5304(6)  | 2613(3)  | 10462(3) | 53(1) |
| C(39B) | 7428(5)  | 2956(3)  | 9464(3)  | 50(1) |
| C(40B) | 9170(6)  | 2703(4)  | 6605(3)  | 60(2) |
| C(7B)  | 5927(8)  | 4724(4)  | 8178(4)  | 25(2) |
| C(8B)  | 7552(11) | 4671(5)  | 7797(6)  | 40(1) |
| C(9B)  | 8385(8)  | 5334(4)  | 7883(4)  | 40(1) |
| C(12B) | 5794(9)  | 4824(5)  | 8954(5)  | 50(1) |
| C(7P)  | 6259(16) | 4426(9)  | 8336(8)  | 31(4) |
| C(8P)  | 7760(20) | 4447(10) | 7884(11) | 40(1) |
| C(9P)  | 8845(15) | 4752(8)  | 8281(8)  | 40(1) |
| C(12P) | 5735(17) | 5174(9)  | 8533(9)  | 50(1) |

---

Table S40. Bond lengths [Å] and angles [°] for au601.

---

|              |            |
|--------------|------------|
| Au(1)-P(1)   | 2.2557(10) |
| Au(1)-S(1)   | 2.3112(12) |
| S(1)-C(39)   | 1.739(5)   |
| P(1)-C(18)   | 1.829(4)   |
| P(1)-C(12)   | 1.844(4)   |
| P(1)-C(6)    | 1.857(4)   |
| F(1)-C(39)   | 1.349(6)   |
| F(2)-C(39)   | 1.347(6)   |
| F(3)-C(39)   | 1.330(6)   |
| C(6)-C(11)   | 1.505(6)   |
| C(6)-C(7)    | 1.533(6)   |
| C(6)-H(6)    | 1.0000     |
| C(7)-C(8)    | 1.544(7)   |
| C(7)-H(7A)   | 0.9900     |
| C(7)-H(7C)   | 0.9900     |
| C(8)-C(9)    | 1.459(7)   |
| C(8)-H(8A)   | 0.9900     |
| C(8)-H(8B)   | 0.9900     |
| C(9)-C(10)   | 1.526(7)   |
| C(9)-H(9A)   | 0.9900     |
| C(9)-H(9B)   | 0.9900     |
| C(10)-C(11)  | 1.535(7)   |
| C(10)-H(10C) | 0.9900     |
| C(10)-H(10D) | 0.9900     |
| C(11)-H(11C) | 0.9900     |
| C(11)-H(11D) | 0.9900     |
| C(12)-C(17)  | 1.519(6)   |
| C(12)-C(13)  | 1.533(6)   |
| C(12)-H(12)  | 1.0000     |
| C(13)-C(14)  | 1.536(6)   |
| C(13)-H(13A) | 0.9900     |
| C(13)-H(13C) | 0.9900     |
| C(14)-C(15)  | 1.516(7)   |
| C(14)-H(14C) | 0.9900     |
| C(14)-H(14D) | 0.9900     |
| C(15)-C(16)  | 1.518(7)   |
| C(15)-H(15C) | 0.9900     |
| C(15)-H(15D) | 0.9900     |
| C(16)-C(17)  | 1.526(6)   |
| C(16)-H(16C) | 0.9900     |
| C(16)-H(16D) | 0.9900     |
| C(17)-H(17C) | 0.9900     |
| C(17)-H(17D) | 0.9900     |
| C(18)-C(23)  | 1.400(6)   |
| C(18)-C(19)  | 1.409(6)   |
| C(19)-C(20)  | 1.381(6)   |
| C(19)-H(19)  | 0.9500     |

|              |            |
|--------------|------------|
| C(20)-C(21)  | 1.376(7)   |
| C(20)-H(20)  | 0.9500     |
| C(21)-C(22)  | 1.370(6)   |
| C(21)-H(21)  | 0.9500     |
| C(22)-C(23)  | 1.400(6)   |
| C(22)-H(22)  | 0.9500     |
| C(23)-C(24)  | 1.502(5)   |
| C(24)-C(25)  | 1.404(6)   |
| C(24)-C(29)  | 1.410(5)   |
| C(25)-C(26)  | 1.391(5)   |
| C(25)-C(30)  | 1.526(5)   |
| C(26)-C(27)  | 1.386(5)   |
| C(26)-H(26)  | 0.9500     |
| C(27)-C(28)  | 1.385(6)   |
| C(27)-C(33)  | 1.519(6)   |
| C(28)-C(29)  | 1.383(6)   |
| C(28)-H(28)  | 0.9500     |
| C(29)-C(36)  | 1.509(6)   |
| C(30)-C(31)  | 1.524(7)   |
| C(30)-C(32)  | 1.534(6)   |
| C(30)-H(30)  | 1.0000     |
| C(31)-H(31A) | 0.9800     |
| C(31)-H(31C) | 0.9800     |
| C(31)-H(31D) | 0.9800     |
| C(32)-H(32D) | 0.9800     |
| C(32)-H(32E) | 0.9800     |
| C(32)-H(32F) | 0.9800     |
| C(33)-C(34)  | 1.507(7)   |
| C(33)-C(35)  | 1.516(7)   |
| C(33)-H(33)  | 1.0000     |
| C(34)-H(34A) | 0.9800     |
| C(34)-H(34C) | 0.9800     |
| C(34)-H(34D) | 0.9800     |
| C(35)-H(35D) | 0.9800     |
| C(35)-H(35E) | 0.9800     |
| C(35)-H(35F) | 0.9800     |
| C(36)-C(38)  | 1.532(6)   |
| C(36)-C(37)  | 1.535(6)   |
| C(36)-H(36)  | 1.0000     |
| C(37)-H(37A) | 0.9800     |
| C(37)-H(37C) | 0.9800     |
| C(37)-H(37D) | 0.9800     |
| C(38)-H(38D) | 0.9800     |
| C(38)-H(38E) | 0.9800     |
| C(38)-H(38F) | 0.9800     |
| Au(1A)-P(1A) | 2.2497(12) |
| Au(1A)-S(5)  | 2.3102(13) |
| S(5)-C(40B)  | 1.713(7)   |
| P(1A)-C(19B) | 1.817(4)   |



|               |           |
|---------------|-----------|
| P(1A)-C(13B)  | 1.838(4)  |
| P(1A)-C(7B)   | 1.878(7)  |
| P(1A)-C(7P)   | 1.878(16) |
| F(1B)-C(40B)  | 1.354(6)  |
| F(2B)-C(40B)  | 1.347(7)  |
| F(3B)-C(40B)  | 1.354(7)  |
| C(10B)-C(9B)  | 1.436(9)  |
| C(10B)-C(11B) | 1.513(7)  |
| C(10B)-C(9P)  | 1.577(16) |
| C(10B)-H(10A) | 0.8529    |
| C(10B)-H(10B) | 0.8791    |
| C(11B)-C(12B) | 1.524(9)  |
| C(11B)-C(12P) | 1.574(16) |
| C(11B)-H(11A) | 0.8581    |
| C(11B)-H(11B) | 0.8646    |
| C(13B)-C(18B) | 1.526(7)  |
| C(13B)-C(14B) | 1.529(6)  |
| C(13B)-H(13B) | 1.0000    |
| C(14B)-C(15B) | 1.527(7)  |
| C(14B)-H(14A) | 0.9900    |
| C(14B)-H(14B) | 0.9900    |
| C(15B)-C(16B) | 1.490(9)  |
| C(15B)-H(15A) | 0.9900    |
| C(15B)-H(15B) | 0.9900    |
| C(16B)-C(17B) | 1.508(8)  |
| C(16B)-H(16A) | 0.9900    |
| C(16B)-H(16B) | 0.9900    |
| C(17B)-C(18B) | 1.525(7)  |
| C(17B)-H(17A) | 0.9900    |
| C(17B)-H(17B) | 0.9900    |
| C(18B)-H(18A) | 0.9900    |
| C(18B)-H(18B) | 0.9900    |
| C(19B)-C(24B) | 1.403(6)  |
| C(19B)-C(20B) | 1.405(6)  |
| C(20B)-C(21B) | 1.373(6)  |
| C(20B)-H(20B) | 0.9500    |
| C(21B)-C(22B) | 1.366(7)  |
| C(21B)-H(21B) | 0.9500    |
| C(22B)-C(23B) | 1.376(6)  |
| C(22B)-H(22B) | 0.9500    |
| C(23B)-C(24B) | 1.395(5)  |
| C(23B)-H(23B) | 0.9500    |
| C(24B)-C(25B) | 1.503(5)  |
| C(25B)-C(26B) | 1.399(6)  |
| C(25B)-C(30B) | 1.408(6)  |
| C(26B)-C(27B) | 1.395(6)  |
| C(26B)-C(31B) | 1.520(6)  |
| C(27B)-C(28B) | 1.385(7)  |
| C(27B)-H(27B) | 0.9500    |

|               |           |
|---------------|-----------|
| C(28B)-C(29B) | 1.372(7)  |
| C(28B)-C(34B) | 1.518(6)  |
| C(29B)-C(30B) | 1.391(6)  |
| C(29B)-H(29B) | 0.9500    |
| C(30B)-C(37B) | 1.508(6)  |
| C(31B)-C(33B) | 1.527(6)  |
| C(31B)-C(32B) | 1.532(6)  |
| C(31B)-H(31B) | 1.0000    |
| C(32B)-H(32A) | 0.9800    |
| C(32B)-H(32B) | 0.9800    |
| C(32B)-H(32C) | 0.9800    |
| C(33B)-H(33A) | 0.9800    |
| C(33B)-H(33B) | 0.9800    |
| C(33B)-H(33C) | 0.9800    |
| C(34B)-C(35B) | 1.502(7)  |
| C(34B)-C(36B) | 1.508(8)  |
| C(34B)-H(34B) | 1.0000    |
| C(35B)-H(35A) | 0.9800    |
| C(35B)-H(35B) | 0.9800    |
| C(35B)-H(35C) | 0.9800    |
| C(36B)-H(36A) | 0.9800    |
| C(36B)-H(36B) | 0.9800    |
| C(36B)-H(36C) | 0.9800    |
| C(37B)-C(39B) | 1.520(6)  |
| C(37B)-C(38B) | 1.528(7)  |
| C(37B)-H(37B) | 1.0000    |
| C(38B)-H(38A) | 0.9800    |
| C(38B)-H(38B) | 0.9800    |
| C(38B)-H(38C) | 0.9800    |
| C(39B)-H(39A) | 0.9800    |
| C(39B)-H(39B) | 0.9800    |
| C(39B)-H(39C) | 0.9800    |
| C(7B)-C(12B)  | 1.525(11) |
| C(7B)-C(8B)   | 1.527(13) |
| C(7B)-H(7B)   | 1.0000    |
| C(8B)-C(9B)   | 1.539(12) |
| C(8B)-H(8BA)  | 0.9899    |
| C(8B)-H(8BB)  | 0.9906    |
| C(9B)-H(9BA)  | 0.9376    |
| C(9B)-H(9BB)  | 0.8698    |
| C(12B)-H(12A) | 0.8437    |
| C(12B)-H(12B) | 0.8491    |
| C(7P)-C(8P)   | 1.47(3)   |
| C(7P)-C(12P)  | 1.55(2)   |
| C(7P)-H(7P)   | 0.9999    |
| C(8P)-C(9P)   | 1.55(3)   |
| C(8P)-H(8PA)  | 0.9899    |
| C(8P)-H(8PB)  | 0.9901    |
| C(9P)-H(10B)  | 1.1860    |

|                     |            |
|---------------------|------------|
| C(9P)-H(9PA)        | 0.8531     |
| C(9P)-H(9PB)        | 0.8793     |
| C(12P)-H(12C)       | 0.8475     |
| C(12P)-H(12D)       | 0.8504     |
| P(1)-Au(1)-S(1)     | 177.42(4)  |
| C(39)-S(1)-Au(1)    | 101.12(18) |
| C(18)-P(1)-C(12)    | 103.77(19) |
| C(18)-P(1)-C(6)     | 106.05(18) |
| C(12)-P(1)-C(6)     | 104.0(2)   |
| C(18)-P(1)-Au(1)    | 114.65(14) |
| C(12)-P(1)-Au(1)    | 115.32(14) |
| C(6)-P(1)-Au(1)     | 111.99(14) |
| C(11)-C(6)-C(7)     | 108.5(4)   |
| C(11)-C(6)-P(1)     | 115.9(3)   |
| C(7)-C(6)-P(1)      | 111.3(3)   |
| C(11)-C(6)-H(6)     | 106.9      |
| C(7)-C(6)-H(6)      | 106.9      |
| P(1)-C(6)-H(6)      | 106.9      |
| C(6)-C(7)-C(8)      | 110.4(4)   |
| C(6)-C(7)-H(7A)     | 109.6      |
| C(8)-C(7)-H(7A)     | 109.6      |
| C(6)-C(7)-H(7C)     | 109.6      |
| C(8)-C(7)-H(7C)     | 109.6      |
| H(7A)-C(7)-H(7C)    | 108.1      |
| C(9)-C(8)-C(7)      | 111.3(5)   |
| C(9)-C(8)-H(8A)     | 109.4      |
| C(7)-C(8)-H(8A)     | 109.4      |
| C(9)-C(8)-H(8B)     | 109.4      |
| C(7)-C(8)-H(8B)     | 109.4      |
| H(8A)-C(8)-H(8B)    | 108.0      |
| C(8)-C(9)-C(10)     | 111.1(5)   |
| C(8)-C(9)-H(9A)     | 109.4      |
| C(10)-C(9)-H(9A)    | 109.4      |
| C(8)-C(9)-H(9B)     | 109.4      |
| C(10)-C(9)-H(9B)    | 109.4      |
| H(9A)-C(9)-H(9B)    | 108.0      |
| C(9)-C(10)-C(11)    | 110.1(4)   |
| C(9)-C(10)-H(10C)   | 109.6      |
| C(11)-C(10)-H(10C)  | 109.6      |
| C(9)-C(10)-H(10D)   | 109.6      |
| C(11)-C(10)-H(10D)  | 109.6      |
| H(10C)-C(10)-H(10D) | 108.2      |
| C(6)-C(11)-C(10)    | 111.5(4)   |
| C(6)-C(11)-H(11C)   | 109.3      |
| C(10)-C(11)-H(11C)  | 109.3      |
| C(6)-C(11)-H(11D)   | 109.3      |
| C(10)-C(11)-H(11D)  | 109.3      |
| H(11C)-C(11)-H(11D) | 108.0      |

|                     |          |
|---------------------|----------|
| C(17)-C(12)-C(13)   | 111.0(4) |
| C(17)-C(12)-P(1)    | 110.4(3) |
| C(13)-C(12)-P(1)    | 112.7(3) |
| C(17)-C(12)-H(12)   | 107.5    |
| C(13)-C(12)-H(12)   | 107.5    |
| P(1)-C(12)-H(12)    | 107.5    |
| C(12)-C(13)-C(14)   | 110.1(4) |
| C(12)-C(13)-H(13A)  | 109.6    |
| C(14)-C(13)-H(13A)  | 109.6    |
| C(12)-C(13)-H(13C)  | 109.6    |
| C(14)-C(13)-H(13C)  | 109.6    |
| H(13A)-C(13)-H(13C) | 108.2    |
| C(15)-C(14)-C(13)   | 111.5(4) |
| C(15)-C(14)-H(14C)  | 109.3    |
| C(13)-C(14)-H(14C)  | 109.3    |
| C(15)-C(14)-H(14D)  | 109.3    |
| C(13)-C(14)-H(14D)  | 109.3    |
| H(14C)-C(14)-H(14D) | 108.0    |
| C(14)-C(15)-C(16)   | 110.6(4) |
| C(14)-C(15)-H(15C)  | 109.5    |
| C(16)-C(15)-H(15C)  | 109.5    |
| C(14)-C(15)-H(15D)  | 109.5    |
| C(16)-C(15)-H(15D)  | 109.5    |
| H(15C)-C(15)-H(15D) | 108.1    |
| C(15)-C(16)-C(17)   | 111.3(4) |
| C(15)-C(16)-H(16C)  | 109.4    |
| C(17)-C(16)-H(16C)  | 109.4    |
| C(15)-C(16)-H(16D)  | 109.4    |
| C(17)-C(16)-H(16D)  | 109.4    |
| H(16C)-C(16)-H(16D) | 108.0    |
| C(12)-C(17)-C(16)   | 111.0(4) |
| C(12)-C(17)-H(17C)  | 109.4    |
| C(16)-C(17)-H(17C)  | 109.4    |
| C(12)-C(17)-H(17D)  | 109.4    |
| C(16)-C(17)-H(17D)  | 109.4    |
| H(17C)-C(17)-H(17D) | 108.0    |
| C(23)-C(18)-C(19)   | 119.3(4) |
| C(23)-C(18)-P(1)    | 123.6(3) |
| C(19)-C(18)-P(1)    | 117.1(3) |
| C(20)-C(19)-C(18)   | 121.0(4) |
| C(20)-C(19)-H(19)   | 119.5    |
| C(18)-C(19)-H(19)   | 119.5    |
| C(21)-C(20)-C(19)   | 119.6(4) |
| C(21)-C(20)-H(20)   | 120.2    |
| C(19)-C(20)-H(20)   | 120.2    |
| C(22)-C(21)-C(20)   | 120.1(4) |
| C(22)-C(21)-H(21)   | 120.0    |
| C(20)-C(21)-H(21)   | 120.0    |
| C(21)-C(22)-C(23)   | 122.1(4) |

|                     |          |
|---------------------|----------|
| C(21)-C(22)-H(22)   | 118.9    |
| C(23)-C(22)-H(22)   | 118.9    |
| C(18)-C(23)-C(22)   | 118.0(4) |
| C(18)-C(23)-C(24)   | 125.6(3) |
| C(22)-C(23)-C(24)   | 116.4(4) |
| C(25)-C(24)-C(29)   | 119.8(4) |
| C(25)-C(24)-C(23)   | 119.8(3) |
| C(29)-C(24)-C(23)   | 120.1(3) |
| C(26)-C(25)-C(24)   | 119.0(4) |
| C(26)-C(25)-C(30)   | 119.5(4) |
| C(24)-C(25)-C(30)   | 121.4(4) |
| C(27)-C(26)-C(25)   | 122.4(4) |
| C(27)-C(26)-H(26)   | 118.8    |
| C(25)-C(26)-H(26)   | 118.8    |
| C(28)-C(27)-C(26)   | 117.3(4) |
| C(28)-C(27)-C(33)   | 119.9(4) |
| C(26)-C(27)-C(33)   | 122.8(4) |
| C(29)-C(28)-C(27)   | 123.1(4) |
| C(29)-C(28)-H(28)   | 118.4    |
| C(27)-C(28)-H(28)   | 118.4    |
| C(28)-C(29)-C(24)   | 118.5(4) |
| C(28)-C(29)-C(36)   | 120.2(4) |
| C(24)-C(29)-C(36)   | 121.4(4) |
| C(31)-C(30)-C(25)   | 109.9(3) |
| C(31)-C(30)-C(32)   | 110.8(4) |
| C(25)-C(30)-C(32)   | 112.3(4) |
| C(31)-C(30)-H(30)   | 107.9    |
| C(25)-C(30)-H(30)   | 107.9    |
| C(32)-C(30)-H(30)   | 107.9    |
| C(30)-C(31)-H(31A)  | 109.5    |
| C(30)-C(31)-H(31C)  | 109.5    |
| H(31A)-C(31)-H(31C) | 109.5    |
| C(30)-C(31)-H(31D)  | 109.5    |
| H(31A)-C(31)-H(31D) | 109.5    |
| H(31C)-C(31)-H(31D) | 109.5    |
| C(30)-C(32)-H(32D)  | 109.5    |
| C(30)-C(32)-H(32E)  | 109.5    |
| H(32D)-C(32)-H(32E) | 109.5    |
| C(30)-C(32)-H(32F)  | 109.5    |
| H(32D)-C(32)-H(32F) | 109.5    |
| H(32E)-C(32)-H(32F) | 109.5    |
| C(34)-C(33)-C(35)   | 111.4(5) |
| C(34)-C(33)-C(27)   | 114.1(4) |
| C(35)-C(33)-C(27)   | 110.8(4) |
| C(34)-C(33)-H(33)   | 106.7    |
| C(35)-C(33)-H(33)   | 106.7    |
| C(27)-C(33)-H(33)   | 106.7    |
| C(33)-C(34)-H(34A)  | 109.5    |
| C(33)-C(34)-H(34C)  | 109.5    |

|                      |            |
|----------------------|------------|
| H(34A)-C(34)-H(34C)  | 109.5      |
| C(33)-C(34)-H(34D)   | 109.5      |
| H(34A)-C(34)-H(34D)  | 109.5      |
| H(34C)-C(34)-H(34D)  | 109.5      |
| C(33)-C(35)-H(35D)   | 109.5      |
| C(33)-C(35)-H(35E)   | 109.5      |
| H(35D)-C(35)-H(35E)  | 109.5      |
| C(33)-C(35)-H(35F)   | 109.5      |
| H(35D)-C(35)-H(35F)  | 109.5      |
| H(35E)-C(35)-H(35F)  | 109.5      |
| C(29)-C(36)-C(38)    | 112.3(4)   |
| C(29)-C(36)-C(37)    | 110.4(4)   |
| C(38)-C(36)-C(37)    | 111.1(4)   |
| C(29)-C(36)-H(36)    | 107.6      |
| C(38)-C(36)-H(36)    | 107.6      |
| C(37)-C(36)-H(36)    | 107.6      |
| C(36)-C(37)-H(37A)   | 109.5      |
| C(36)-C(37)-H(37C)   | 109.5      |
| H(37A)-C(37)-H(37C)  | 109.5      |
| C(36)-C(37)-H(37D)   | 109.5      |
| H(37A)-C(37)-H(37D)  | 109.5      |
| H(37C)-C(37)-H(37D)  | 109.5      |
| C(36)-C(38)-H(38D)   | 109.5      |
| C(36)-C(38)-H(38E)   | 109.5      |
| H(38D)-C(38)-H(38E)  | 109.5      |
| C(36)-C(38)-H(38F)   | 109.5      |
| H(38D)-C(38)-H(38F)  | 109.5      |
| H(38E)-C(38)-H(38F)  | 109.5      |
| F(3)-C(39)-F(2)      | 103.0(4)   |
| F(3)-C(39)-F(1)      | 105.9(4)   |
| F(2)-C(39)-F(1)      | 104.4(4)   |
| F(3)-C(39)-S(1)      | 115.7(4)   |
| F(2)-C(39)-S(1)      | 115.7(3)   |
| F(1)-C(39)-S(1)      | 111.0(4)   |
| P(1A)-Au(1A)-S(5)    | 173.18(5)  |
| C(40B)-S(5)-Au(1A)   | 97.0(2)    |
| C(19B)-P(1A)-C(13B)  | 104.4(2)   |
| C(19B)-P(1A)-C(7B)   | 107.5(3)   |
| C(13B)-P(1A)-C(7B)   | 98.8(3)    |
| C(19B)-P(1A)-C(7P)   | 104.5(5)   |
| C(13B)-P(1A)-C(7P)   | 120.4(5)   |
| C(19B)-P(1A)-Au(1A)  | 115.98(14) |
| C(13B)-P(1A)-Au(1A)  | 111.27(16) |
| C(7B)-P(1A)-Au(1A)   | 116.9(2)   |
| C(7P)-P(1A)-Au(1A)   | 100.8(5)   |
| C(9B)-C(10B)-C(11B)  | 112.9(5)   |
| C(11B)-C(10B)-C(9P)  | 116.1(6)   |
| C(9B)-C(10B)-H(10A)  | 111.5      |
| C(11B)-C(10B)-H(10A) | 122.5      |

|                      |          |
|----------------------|----------|
| C(9P)-C(10B)-H(10A)  | 118.2    |
| C(9B)-C(10B)-H(10B)  | 104.0    |
| C(11B)-C(10B)-H(10B) | 93.2     |
| C(9P)-C(10B)-H(10B)  | 48.1     |
| H(10A)-C(10B)-H(10B) | 109.4    |
| C(10B)-C(11B)-C(12B) | 114.2(5) |
| C(10B)-C(11B)-C(12P) | 105.4(7) |
| C(10B)-C(11B)-H(11A) | 109.6    |
| C(12B)-C(11B)-H(11A) | 100.6    |
| C(12P)-C(11B)-H(11A) | 135.8    |
| C(10B)-C(11B)-H(11B) | 92.5     |
| C(12B)-C(11B)-H(11B) | 123.6    |
| C(12P)-C(11B)-H(11B) | 87.5     |
| H(11A)-C(11B)-H(11B) | 116.5    |
| C(18B)-C(13B)-C(14B) | 110.0(4) |
| C(18B)-C(13B)-P(1A)  | 111.6(3) |
| C(14B)-C(13B)-P(1A)  | 112.0(3) |
| C(18B)-C(13B)-H(13B) | 107.7    |
| C(14B)-C(13B)-H(13B) | 107.7    |
| P(1A)-C(13B)-H(13B)  | 107.7    |
| C(15B)-C(14B)-C(13B) | 111.2(4) |
| C(15B)-C(14B)-H(14A) | 109.4    |
| C(13B)-C(14B)-H(14A) | 109.4    |
| C(15B)-C(14B)-H(14B) | 109.4    |
| C(13B)-C(14B)-H(14B) | 109.4    |
| H(14A)-C(14B)-H(14B) | 108.0    |
| C(16B)-C(15B)-C(14B) | 111.9(5) |
| C(16B)-C(15B)-H(15A) | 109.2    |
| C(14B)-C(15B)-H(15A) | 109.2    |
| C(16B)-C(15B)-H(15B) | 109.2    |
| C(14B)-C(15B)-H(15B) | 109.2    |
| H(15A)-C(15B)-H(15B) | 107.9    |
| C(15B)-C(16B)-C(17B) | 110.1(5) |
| C(15B)-C(16B)-H(16A) | 109.6    |
| C(17B)-C(16B)-H(16A) | 109.6    |
| C(15B)-C(16B)-H(16B) | 109.6    |
| C(17B)-C(16B)-H(16B) | 109.6    |
| H(16A)-C(16B)-H(16B) | 108.2    |
| C(16B)-C(17B)-C(18B) | 111.6(5) |
| C(16B)-C(17B)-H(17A) | 109.3    |
| C(18B)-C(17B)-H(17A) | 109.3    |
| C(16B)-C(17B)-H(17B) | 109.3    |
| C(18B)-C(17B)-H(17B) | 109.3    |
| H(17A)-C(17B)-H(17B) | 108.0    |
| C(17B)-C(18B)-C(13B) | 110.7(5) |
| C(17B)-C(18B)-H(18A) | 109.5    |
| C(13B)-C(18B)-H(18A) | 109.5    |
| C(17B)-C(18B)-H(18B) | 109.5    |
| C(13B)-C(18B)-H(18B) | 109.5    |

|                      |          |
|----------------------|----------|
| H(18A)-C(18B)-H(18B) | 108.1    |
| C(24B)-C(19B)-C(20B) | 118.3(4) |
| C(24B)-C(19B)-P(1A)  | 123.1(3) |
| C(20B)-C(19B)-P(1A)  | 118.6(3) |
| C(21B)-C(20B)-C(19B) | 121.5(4) |
| C(21B)-C(20B)-H(20B) | 119.3    |
| C(19B)-C(20B)-H(20B) | 119.3    |
| C(22B)-C(21B)-C(20B) | 120.4(4) |
| C(22B)-C(21B)-H(21B) | 119.8    |
| C(20B)-C(21B)-H(21B) | 119.8    |
| C(21B)-C(22B)-C(23B) | 119.3(4) |
| C(21B)-C(22B)-H(22B) | 120.4    |
| C(23B)-C(22B)-H(22B) | 120.4    |
| C(22B)-C(23B)-C(24B) | 122.2(4) |
| C(22B)-C(23B)-H(23B) | 118.9    |
| C(24B)-C(23B)-H(23B) | 118.9    |
| C(23B)-C(24B)-C(19B) | 118.4(4) |
| C(23B)-C(24B)-C(25B) | 115.3(4) |
| C(19B)-C(24B)-C(25B) | 126.2(3) |
| C(26B)-C(25B)-C(30B) | 120.0(4) |
| C(26B)-C(25B)-C(24B) | 119.4(3) |
| C(30B)-C(25B)-C(24B) | 120.0(4) |
| C(27B)-C(26B)-C(25B) | 118.6(4) |
| C(27B)-C(26B)-C(31B) | 119.8(4) |
| C(25B)-C(26B)-C(31B) | 121.7(4) |
| C(28B)-C(27B)-C(26B) | 122.3(4) |
| C(28B)-C(27B)-H(27B) | 118.8    |
| C(26B)-C(27B)-H(27B) | 118.8    |
| C(29B)-C(28B)-C(27B) | 117.8(4) |
| C(29B)-C(28B)-C(34B) | 120.8(4) |
| C(27B)-C(28B)-C(34B) | 121.4(5) |
| C(28B)-C(29B)-C(30B) | 122.6(4) |
| C(28B)-C(29B)-H(29B) | 118.7    |
| C(30B)-C(29B)-H(29B) | 118.7    |
| C(29B)-C(30B)-C(25B) | 118.6(4) |
| C(29B)-C(30B)-C(37B) | 119.2(4) |
| C(25B)-C(30B)-C(37B) | 122.2(4) |
| C(26B)-C(31B)-C(33B) | 110.5(4) |
| C(26B)-C(31B)-C(32B) | 112.4(4) |
| C(33B)-C(31B)-C(32B) | 110.7(4) |
| C(26B)-C(31B)-H(31B) | 107.7    |
| C(33B)-C(31B)-H(31B) | 107.7    |
| C(32B)-C(31B)-H(31B) | 107.7    |
| C(31B)-C(32B)-H(32A) | 109.5    |
| C(31B)-C(32B)-H(32B) | 109.5    |
| H(32A)-C(32B)-H(32B) | 109.5    |
| C(31B)-C(32B)-H(32C) | 109.5    |
| H(32A)-C(32B)-H(32C) | 109.5    |
| H(32B)-C(32B)-H(32C) | 109.5    |



|                      |          |
|----------------------|----------|
| C(31B)-C(33B)-H(33A) | 109.5    |
| C(31B)-C(33B)-H(33B) | 109.5    |
| H(33A)-C(33B)-H(33B) | 109.5    |
| C(31B)-C(33B)-H(33C) | 109.5    |
| H(33A)-C(33B)-H(33C) | 109.5    |
| H(33B)-C(33B)-H(33C) | 109.5    |
| C(35B)-C(34B)-C(36B) | 112.4(5) |
| C(35B)-C(34B)-C(28B) | 112.7(4) |
| C(36B)-C(34B)-C(28B) | 111.3(4) |
| C(35B)-C(34B)-H(34B) | 106.7    |
| C(36B)-C(34B)-H(34B) | 106.7    |
| C(28B)-C(34B)-H(34B) | 106.7    |
| C(34B)-C(35B)-H(35A) | 109.5    |
| C(34B)-C(35B)-H(35B) | 109.5    |
| H(35A)-C(35B)-H(35B) | 109.5    |
| C(34B)-C(35B)-H(35C) | 109.5    |
| H(35A)-C(35B)-H(35C) | 109.5    |
| H(35B)-C(35B)-H(35C) | 109.5    |
| C(34B)-C(36B)-H(36A) | 109.5    |
| C(34B)-C(36B)-H(36B) | 109.5    |
| H(36A)-C(36B)-H(36B) | 109.5    |
| C(34B)-C(36B)-H(36C) | 109.5    |
| H(36A)-C(36B)-H(36C) | 109.5    |
| H(36B)-C(36B)-H(36C) | 109.5    |
| C(30B)-C(37B)-C(39B) | 112.4(4) |
| C(30B)-C(37B)-C(38B) | 110.8(4) |
| C(39B)-C(37B)-C(38B) | 110.6(4) |
| C(30B)-C(37B)-H(37B) | 107.6    |
| C(39B)-C(37B)-H(37B) | 107.6    |
| C(38B)-C(37B)-H(37B) | 107.6    |
| C(37B)-C(38B)-H(38A) | 109.5    |
| C(37B)-C(38B)-H(38B) | 109.5    |
| H(38A)-C(38B)-H(38B) | 109.5    |
| C(37B)-C(38B)-H(38C) | 109.5    |
| H(38A)-C(38B)-H(38C) | 109.5    |
| H(38B)-C(38B)-H(38C) | 109.5    |
| C(37B)-C(39B)-H(39A) | 109.5    |
| C(37B)-C(39B)-H(39B) | 109.5    |
| H(39A)-C(39B)-H(39B) | 109.5    |
| C(37B)-C(39B)-H(39C) | 109.5    |
| H(39A)-C(39B)-H(39C) | 109.5    |
| H(39B)-C(39B)-H(39C) | 109.5    |
| F(2B)-C(40B)-F(1B)   | 104.8(5) |
| F(2B)-C(40B)-F(3B)   | 103.3(6) |
| F(1B)-C(40B)-F(3B)   | 105.0(4) |
| F(2B)-C(40B)-S(5)    | 115.6(4) |
| F(1B)-C(40B)-S(5)    | 111.2(5) |
| F(3B)-C(40B)-S(5)    | 115.8(4) |
| C(12B)-C(7B)-C(8B)   | 110.6(7) |

|                      |           |
|----------------------|-----------|
| C(12B)-C(7B)-P(1A)   | 116.7(5)  |
| C(8B)-C(7B)-P(1A)    | 109.9(6)  |
| C(12B)-C(7B)-H(7B)   | 106.3     |
| C(8B)-C(7B)-H(7B)    | 106.3     |
| P(1A)-C(7B)-H(7B)    | 106.4     |
| C(7B)-C(8B)-C(9B)    | 110.1(7)  |
| C(7B)-C(8B)-H(8BA)   | 110.0     |
| C(9B)-C(8B)-H(8BA)   | 109.5     |
| C(7B)-C(8B)-H(8BB)   | 109.4     |
| C(9B)-C(8B)-H(8BB)   | 109.7     |
| H(8BA)-C(8B)-H(8BB)  | 108.1     |
| C(10B)-C(9B)-C(8B)   | 112.2(7)  |
| C(10B)-C(9B)-H(9BA)  | 83.0      |
| C(8B)-C(9B)-H(9BA)   | 88.9      |
| C(10B)-C(9B)-H(9BB)  | 121.9     |
| C(8B)-C(9B)-H(9BB)   | 111.7     |
| H(9BA)-C(9B)-H(9BB)  | 133.5     |
| C(11B)-C(12B)-C(7B)  | 108.8(6)  |
| C(11B)-C(12B)-H(12A) | 100.3     |
| C(7B)-C(12B)-H(12A)  | 114.3     |
| C(11B)-C(12B)-H(12B) | 139.0     |
| C(7B)-C(12B)-H(12B)  | 85.1      |
| H(12A)-C(12B)-H(12B) | 108.9     |
| C(8P)-C(7P)-C(12P)   | 110.2(14) |
| C(8P)-C(7P)-P(1A)    | 114.4(13) |
| C(12P)-C(7P)-P(1A)   | 110.7(10) |
| C(8P)-C(7P)-H(7P)    | 106.2     |
| C(12P)-C(7P)-H(7P)   | 107.6     |
| P(1A)-C(7P)-H(7P)    | 107.4     |
| C(7P)-C(8P)-C(9P)    | 109.6(16) |
| C(7P)-C(8P)-H(8PA)   | 108.6     |
| C(9P)-C(8P)-H(8PA)   | 110.6     |
| C(7P)-C(8P)-H(8PB)   | 109.9     |
| C(9P)-C(8P)-H(8PB)   | 109.9     |
| H(8PA)-C(8P)-H(8PB)  | 108.2     |
| C(8P)-C(9P)-C(10B)   | 112.1(11) |
| C(8P)-C(9P)-H(10B)   | 123.6     |
| C(10B)-C(9P)-H(10B)  | 33.5      |
| C(8P)-C(9P)-H(9PA)   | 91.6      |
| C(10B)-C(9P)-H(9PA)  | 124.3     |
| H(10B)-C(9P)-H(9PA)  | 91.2      |
| C(8P)-C(9P)-H(9PB)   | 116.7     |
| C(10B)-C(9P)-H(9PB)  | 107.9     |
| H(10B)-C(9P)-H(9PB)  | 117.0     |
| H(9PA)-C(9P)-H(9PB)  | 103.9     |
| C(7P)-C(12P)-C(11B)  | 110.5(12) |
| C(7P)-C(12P)-H(12C)  | 116.6     |
| C(11B)-C(12P)-H(12C) | 132.6     |
| C(7P)-C(12P)-H(12D)  | 83.0      |

|                      |       |
|----------------------|-------|
| C(11B)-C(12P)-H(12D) | 78.3  |
| H(12C)-C(12P)-H(12D) | 101.8 |

---

Table S41. Anisotropic displacement parameters ( $\text{\AA}^2 \times 10^3$ ) for au601. The anisotropic displacement factor exponent takes the form:  $-2\pi^2 [h^2 a^{*2} U^{11} + \dots + 2 h k a^* b^* U^{12}]$

|        | $U^{11}$ | $U^{22}$ | $U^{33}$ | $U^{23}$ | $U^{13}$ | $U^{12}$ |
|--------|----------|----------|----------|----------|----------|----------|
| Au(1)  | 30(1)    | 26(1)    | 26(1)    | -2(1)    | -12(1)   | 3(1)     |
| S(1)   | 75(1)    | 29(1)    | 37(1)    | -6(1)    | -32(1)   | 11(1)    |
| P(1)   | 24(1)    | 22(1)    | 24(1)    | -1(1)    | -8(1)    | 0(1)     |
| F(1)   | 155(4)   | 37(2)    | 85(3)    | 11(2)    | -80(3)   | 12(2)    |
| F(2)   | 61(2)    | 34(2)    | 83(2)    | -12(2)   | -30(2)   | -8(1)    |
| F(3)   | 39(2)    | 56(2)    | 130(3)   | 0(2)     | -16(2)   | 10(2)    |
| C(6)   | 38(2)    | 27(2)    | 27(2)    | -3(2)    | -13(2)   | -2(2)    |
| C(7)   | 45(3)    | 27(3)    | 55(3)    | 3(2)     | -25(2)   | -7(2)    |
| C(8)   | 66(4)    | 28(3)    | 74(4)    | -1(3)    | -32(3)   | -4(2)    |
| C(9)   | 65(4)    | 36(3)    | 56(3)    | 0(3)     | -18(3)   | -9(3)    |
| C(10)  | 52(3)    | 47(4)    | 65(4)    | -10(3)   | -29(3)   | -9(2)    |
| C(11)  | 46(3)    | 43(3)    | 57(3)    | -8(3)    | -19(3)   | -4(2)    |
| C(12)  | 28(2)    | 28(2)    | 28(2)    | 0(2)     | -6(2)    | 0(2)     |
| C(13)  | 35(2)    | 28(3)    | 41(3)    | -3(2)    | 1(2)     | 0(2)     |
| C(14)  | 36(3)    | 48(3)    | 44(3)    | -3(2)    | 3(2)     | 4(2)     |
| C(15)  | 25(2)    | 53(3)    | 47(3)    | 3(3)     | 2(2)     | -2(2)    |
| C(16)  | 39(3)    | 37(3)    | 54(3)    | 8(2)     | 0(2)     | -6(2)    |
| C(17)  | 35(2)    | 27(3)    | 46(3)    | -3(2)    | -9(2)    | -1(2)    |
| C(18)  | 22(2)    | 23(2)    | 26(2)    | -1(2)    | -10(2)   | -5(2)    |
| C(19)  | 35(2)    | 36(3)    | 27(2)    | -4(2)    | -14(2)   | -1(2)    |
| C(20)  | 40(2)    | 35(3)    | 34(2)    | 6(2)     | -22(2)   | -5(2)    |
| C(21)  | 39(3)    | 30(3)    | 43(3)    | 3(2)     | -20(2)   | 5(2)     |
| C(22)  | 31(2)    | 24(2)    | 35(2)    | -5(2)    | -9(2)    | 3(2)     |
| C(23)  | 21(2)    | 18(2)    | 28(2)    | 1(2)     | -6(2)    | -7(2)    |
| C(24)  | 24(2)    | 18(2)    | 19(2)    | -2(2)    | -4(2)    | 1(2)     |
| C(25)  | 29(2)    | 16(2)    | 23(2)    | 0(2)     | -5(2)    | -3(2)    |
| C(26)  | 29(2)    | 24(2)    | 21(2)    | -4(2)    | -4(2)    | -7(2)    |
| C(27)  | 33(2)    | 19(2)    | 24(2)    | -2(2)    | -7(2)    | 4(2)     |
| C(28)  | 25(2)    | 19(2)    | 25(2)    | 4(2)     | 1(2)     | -3(2)    |
| C(29)  | 20(2)    | 19(2)    | 31(2)    | -1(2)    | -6(2)    | 0(2)     |
| C(30)  | 36(2)    | 29(3)    | 20(2)    | 2(2)     | -6(2)    | -15(2)   |
| C(31)  | 71(3)    | 28(3)    | 28(2)    | -2(2)    | -5(2)    | -22(2)   |
| C(32)  | 36(3)    | 78(4)    | 32(3)    | 4(3)     | -7(2)    | -24(3)   |
| C(33)  | 42(2)    | 28(3)    | 21(2)    | 3(2)     | -7(2)    | -2(2)    |
| C(34)  | 53(3)    | 81(5)    | 29(3)    | 6(3)     | -15(2)   | -14(3)   |
| C(35)  | 75(4)    | 96(5)    | 28(3)    | -16(3)   | -11(3)   | 33(4)    |
| C(36)  | 27(2)    | 29(3)    | 37(2)    | 0(2)     | -7(2)    | -10(2)   |
| C(37)  | 32(3)    | 44(3)    | 62(3)    | -1(3)    | -17(2)   | -6(2)    |
| C(38)  | 41(3)    | 28(3)    | 49(3)    | -3(2)    | -7(2)    | -12(2)   |
| C(39)  | 41(3)    | 31(3)    | 54(3)    | 0(2)     | -26(2)   | 0(2)     |
| Au(1A) | 30(1)    | 31(1)    | 37(1)    | 0(1)     | -1(1)    | 2(1)     |
| S(5)   | 46(1)    | 43(1)    | 75(1)    | -10(1)   | 8(1)     | 11(1)    |
| P(1A)  | 31(1)    | 26(1)    | 23(1)    | -1(1)    | -7(1)    | -4(1)    |
| F(1B)  | 57(2)    | 127(4)   | 68(2)    | -36(2)   | 2(2)     | 28(2)    |

|        |       |        |       |        |        |        |
|--------|-------|--------|-------|--------|--------|--------|
| F(2B)  | 92(3) | 104(3) | 61(2) | 26(2)  | 11(2)  | 18(2)  |
| F(3B)  | 58(2) | 121(4) | 86(3) | -43(3) | -19(2) | 5(2)   |
| C(10B) | 57(2) | 43(2)  | 59(2) | -10(2) | -25(2) | -13(2) |
| C(11B) | 57(2) | 43(2)  | 59(2) | -10(2) | -25(2) | -13(2) |
| C(13B) | 54(3) | 27(3)  | 27(2) | 3(2)   | -9(2)  | 5(2)   |
| C(14B) | 65(3) | 52(4)  | 32(3) | 8(2)   | -8(3)  | -11(3) |
| C(15B) | 86(4) | 52(4)  | 33(3) | 16(3)  | -4(3)  | 7(3)   |
| C(16B) | 64(4) | 67(4)  | 37(3) | 3(3)   | -18(3) | 10(3)  |
| C(17B) | 59(4) | 109(6) | 39(3) | 23(3)  | -23(3) | -5(3)  |
| C(18B) | 53(3) | 58(4)  | 35(3) | 8(3)   | -18(2) | -10(3) |
| C(19B) | 30(2) | 21(2)  | 22(2) | -6(2)  | -10(2) | 1(2)   |
| C(20B) | 40(2) | 26(3)  | 39(3) | -8(2)  | -16(2) | 10(2)  |
| C(21B) | 36(3) | 41(3)  | 40(3) | -18(2) | -13(2) | 16(2)  |
| C(22B) | 20(2) | 52(3)  | 31(2) | -18(2) | 0(2)   | 4(2)   |
| C(23B) | 25(2) | 35(3)  | 26(2) | -6(2)  | -3(2)  | -3(2)  |
| C(24B) | 20(2) | 24(2)  | 22(2) | -6(2)  | -8(2)  | 1(2)   |
| C(25B) | 23(2) | 22(2)  | 23(2) | -3(2)  | 0(2)   | -2(2)  |
| C(26B) | 27(2) | 24(2)  | 28(2) | -3(2)  | 0(2)   | -2(2)  |
| C(27B) | 46(3) | 27(3)  | 34(2) | -10(2) | -2(2)  | -2(2)  |
| C(28B) | 32(2) | 27(3)  | 41(3) | -1(2)  | 1(2)   | 5(2)   |
| C(29B) | 27(2) | 31(3)  | 44(3) | -2(2)  | -4(2)  | 4(2)   |
| C(30B) | 22(2) | 26(2)  | 30(2) | 7(2)   | 2(2)   | -2(2)  |
| C(31B) | 39(2) | 29(3)  | 28(2) | -5(2)  | -8(2)  | -7(2)  |
| C(32B) | 33(2) | 41(3)  | 34(2) | -6(2)  | -5(2)  | -4(2)  |
| C(33B) | 54(3) | 43(3)  | 32(3) | -6(2)  | -10(2) | -14(2) |
| C(34B) | 48(3) | 31(3)  | 57(3) | -3(2)  | -7(3)  | 12(2)  |
| C(35B) | 65(3) | 26(3)  | 61(4) | 1(3)   | -8(3)  | 10(2)  |
| C(36B) | 84(4) | 45(4)  | 71(4) | -4(3)  | 15(4)  | 35(3)  |
| C(37B) | 28(2) | 32(3)  | 40(3) | -2(2)  | -12(2) | 3(2)   |
| C(38B) | 59(3) | 64(4)  | 39(3) | -5(3)  | -15(3) | -5(3)  |
| C(39B) | 32(3) | 52(4)  | 68(4) | -1(3)  | -17(3) | -5(2)  |
| C(40B) | 48(3) | 93(5)  | 37(3) | -15(3) | -5(3)  | 26(3)  |
| C(7B)  | 29(4) | 24(4)  | 24(4) | -2(3)  | -10(3) | -6(3)  |
| C(8B)  | 41(3) | 35(3)  | 45(3) | -4(3)  | -11(2) | -12(2) |
| C(9B)  | 41(3) | 35(3)  | 45(3) | -4(3)  | -11(2) | -12(2) |
| C(12B) | 57(2) | 43(2)  | 59(2) | -10(2) | -25(2) | -13(2) |
| C(7P)  | 32(8) | 31(10) | 34(8) | 7(7)   | -17(6) | 0(6)   |
| C(8P)  | 41(3) | 35(3)  | 45(3) | -4(3)  | -11(2) | -12(2) |
| C(9P)  | 41(3) | 35(3)  | 45(3) | -4(3)  | -11(2) | -12(2) |
| C(12P) | 57(2) | 43(2)  | 59(2) | -10(2) | -25(2) | -13(2) |

---

Table S42. Torsion angles [°] for au601.

|                         |           |
|-------------------------|-----------|
| C(18)-P(1)-C(6)-C(11)   | 32.8(4)   |
| C(12)-P(1)-C(6)-C(11)   | 141.9(4)  |
| Au(1)-P(1)-C(6)-C(11)   | -92.9(4)  |
| C(18)-P(1)-C(6)-C(7)    | 157.4(3)  |
| C(12)-P(1)-C(6)-C(7)    | -93.6(3)  |
| Au(1)-P(1)-C(6)-C(7)    | 31.6(4)   |
| C(11)-C(6)-C(7)-C(8)    | -57.4(6)  |
| P(1)-C(6)-C(7)-C(8)     | 174.0(4)  |
| C(6)-C(7)-C(8)-C(9)     | 58.3(6)   |
| C(7)-C(8)-C(9)-C(10)    | -57.1(6)  |
| C(8)-C(9)-C(10)-C(11)   | 56.3(7)   |
| C(7)-C(6)-C(11)-C(10)   | 58.0(6)   |
| P(1)-C(6)-C(11)-C(10)   | -176.0(4) |
| C(9)-C(10)-C(11)-C(6)   | -57.4(6)  |
| C(18)-P(1)-C(12)-C(17)  | -63.3(3)  |
| C(6)-P(1)-C(12)-C(17)   | -174.0(3) |
| Au(1)-P(1)-C(12)-C(17)  | 62.9(3)   |
| C(18)-P(1)-C(12)-C(13)  | 171.9(3)  |
| C(6)-P(1)-C(12)-C(13)   | 61.1(4)   |
| Au(1)-P(1)-C(12)-C(13)  | -61.9(4)  |
| C(17)-C(12)-C(13)-C(14) | 55.9(5)   |
| P(1)-C(12)-C(13)-C(14)  | -179.7(3) |
| C(12)-C(13)-C(14)-C(15) | -56.2(5)  |
| C(13)-C(14)-C(15)-C(16) | 56.5(6)   |
| C(14)-C(15)-C(16)-C(17) | -56.3(6)  |
| C(13)-C(12)-C(17)-C(16) | -56.3(5)  |
| P(1)-C(12)-C(17)-C(16)  | 178.0(3)  |
| C(15)-C(16)-C(17)-C(12) | 56.4(6)   |
| C(12)-P(1)-C(18)-C(23)  | 130.1(3)  |
| C(6)-P(1)-C(18)-C(23)   | -120.6(3) |
| Au(1)-P(1)-C(18)-C(23)  | 3.5(4)    |
| C(12)-P(1)-C(18)-C(19)  | -52.4(4)  |
| C(6)-P(1)-C(18)-C(19)   | 56.9(4)   |
| Au(1)-P(1)-C(18)-C(19)  | -179.0(3) |
| C(23)-C(18)-C(19)-C(20) | 1.1(6)    |
| P(1)-C(18)-C(19)-C(20)  | -176.5(3) |
| C(18)-C(19)-C(20)-C(21) | 0.3(7)    |
| C(19)-C(20)-C(21)-C(22) | -1.3(7)   |
| C(20)-C(21)-C(22)-C(23) | 0.9(7)    |
| C(19)-C(18)-C(23)-C(22) | -1.5(6)   |
| P(1)-C(18)-C(23)-C(22)  | 175.9(3)  |
| C(19)-C(18)-C(23)-C(24) | 178.2(4)  |
| P(1)-C(18)-C(23)-C(24)  | -4.4(6)   |
| C(21)-C(22)-C(23)-C(18) | 0.6(6)    |
| C(21)-C(22)-C(23)-C(24) | -179.2(4) |
| C(18)-C(23)-C(24)-C(25) | -94.2(5)  |
| C(22)-C(23)-C(24)-C(25) | 85.5(5)   |

|                             |           |
|-----------------------------|-----------|
| C(18)-C(23)-C(24)-C(29)     | 93.2(5)   |
| C(22)-C(23)-C(24)-C(29)     | -87.1(5)  |
| C(29)-C(24)-C(25)-C(26)     | -1.1(6)   |
| C(23)-C(24)-C(25)-C(26)     | -173.8(3) |
| C(29)-C(24)-C(25)-C(30)     | 175.8(4)  |
| C(23)-C(24)-C(25)-C(30)     | 3.1(6)    |
| C(24)-C(25)-C(26)-C(27)     | 0.7(6)    |
| C(30)-C(25)-C(26)-C(27)     | -176.3(4) |
| C(25)-C(26)-C(27)-C(28)     | 0.0(6)    |
| C(25)-C(26)-C(27)-C(33)     | 178.0(4)  |
| C(26)-C(27)-C(28)-C(29)     | -0.4(6)   |
| C(33)-C(27)-C(28)-C(29)     | -178.4(4) |
| C(27)-C(28)-C(29)-C(24)     | 0.0(6)    |
| C(27)-C(28)-C(29)-C(36)     | 179.5(4)  |
| C(25)-C(24)-C(29)-C(28)     | 0.8(6)    |
| C(23)-C(24)-C(29)-C(28)     | 173.5(4)  |
| C(25)-C(24)-C(29)-C(36)     | -178.7(4) |
| C(23)-C(24)-C(29)-C(36)     | -6.0(6)   |
| C(26)-C(25)-C(30)-C(31)     | 77.2(5)   |
| C(24)-C(25)-C(30)-C(31)     | -99.7(5)  |
| C(26)-C(25)-C(30)-C(32)     | -46.6(5)  |
| C(24)-C(25)-C(30)-C(32)     | 136.4(4)  |
| C(28)-C(27)-C(33)-C(34)     | -162.7(4) |
| C(26)-C(27)-C(33)-C(34)     | 19.4(6)   |
| C(28)-C(27)-C(33)-C(35)     | 70.6(6)   |
| C(26)-C(27)-C(33)-C(35)     | -107.3(5) |
| C(28)-C(29)-C(36)-C(38)     | 50.4(5)   |
| C(24)-C(29)-C(36)-C(38)     | -130.1(4) |
| C(28)-C(29)-C(36)-C(37)     | -74.2(5)  |
| C(24)-C(29)-C(36)-C(37)     | 105.3(5)  |
| Au(1)-S(1)-C(39)-F(3)       | -64.9(4)  |
| Au(1)-S(1)-C(39)-F(2)       | 55.6(4)   |
| Au(1)-S(1)-C(39)-F(1)       | 174.4(3)  |
| C(9B)-C(10B)-C(11B)-C(12B)  | 51.9(8)   |
| C(9P)-C(10B)-C(11B)-C(12P)  | -51.3(10) |
| C(19B)-P(1A)-C(13B)-C(18B)  | -63.6(4)  |
| C(7B)-P(1A)-C(13B)-C(18B)   | -174.3(4) |
| C(7P)-P(1A)-C(13B)-C(18B)   | 179.7(6)  |
| Au(1A)-P(1A)-C(13B)-C(18B)  | 62.3(4)   |
| C(19B)-P(1A)-C(13B)-C(14B)  | 172.7(4)  |
| C(7B)-P(1A)-C(13B)-C(14B)   | 62.0(4)   |
| C(7P)-P(1A)-C(13B)-C(14B)   | 55.9(7)   |
| Au(1A)-P(1A)-C(13B)-C(14B)  | -61.5(4)  |
| C(18B)-C(13B)-C(14B)-C(15B) | 54.8(6)   |
| P(1A)-C(13B)-C(14B)-C(15B)  | 179.5(4)  |
| C(13B)-C(14B)-C(15B)-C(16B) | -56.3(7)  |
| C(14B)-C(15B)-C(16B)-C(17B) | 56.8(7)   |
| C(15B)-C(16B)-C(17B)-C(18B) | -57.4(7)  |
| C(16B)-C(17B)-C(18B)-C(13B) | 57.2(7)   |

|                             |           |
|-----------------------------|-----------|
| C(14B)-C(13B)-C(18B)-C(17B) | -55.3(6)  |
| P(1A)-C(13B)-C(18B)-C(17B)  | 179.8(4)  |
| C(13B)-P(1A)-C(19B)-C(24B)  | 136.3(4)  |
| C(7B)-P(1A)-C(19B)-C(24B)   | -119.4(4) |
| C(7P)-P(1A)-C(19B)-C(24B)   | -96.4(6)  |
| Au(1A)-P(1A)-C(19B)-C(24B)  | 13.5(4)   |
| C(13B)-P(1A)-C(19B)-C(20B)  | -45.6(4)  |
| C(7B)-P(1A)-C(19B)-C(20B)   | 58.7(4)   |
| C(7P)-P(1A)-C(19B)-C(20B)   | 81.7(6)   |
| Au(1A)-P(1A)-C(19B)-C(20B)  | -168.4(3) |
| C(24B)-C(19B)-C(20B)-C(21B) | 0.1(6)    |
| P(1A)-C(19B)-C(20B)-C(21B)  | -178.1(4) |
| C(19B)-C(20B)-C(21B)-C(22B) | 1.0(7)    |
| C(20B)-C(21B)-C(22B)-C(23B) | -1.2(7)   |
| C(21B)-C(22B)-C(23B)-C(24B) | 0.2(7)    |
| C(22B)-C(23B)-C(24B)-C(19B) | 0.9(6)    |
| C(22B)-C(23B)-C(24B)-C(25B) | -176.7(4) |
| C(20B)-C(19B)-C(24B)-C(23B) | -1.0(6)   |
| P(1A)-C(19B)-C(24B)-C(23B)  | 177.1(3)  |
| C(20B)-C(19B)-C(24B)-C(25B) | 176.3(4)  |
| P(1A)-C(19B)-C(24B)-C(25B)  | -5.6(6)   |
| C(23B)-C(24B)-C(25B)-C(26B) | 84.3(5)   |
| C(19B)-C(24B)-C(25B)-C(26B) | -93.1(5)  |
| C(23B)-C(24B)-C(25B)-C(30B) | -86.4(5)  |
| C(19B)-C(24B)-C(25B)-C(30B) | 96.1(5)   |
| C(30B)-C(25B)-C(26B)-C(27B) | 2.3(6)    |
| C(24B)-C(25B)-C(26B)-C(27B) | -168.4(4) |
| C(30B)-C(25B)-C(26B)-C(31B) | -178.5(4) |
| C(24B)-C(25B)-C(26B)-C(31B) | 10.7(6)   |
| C(25B)-C(26B)-C(27B)-C(28B) | 0.3(6)    |
| C(31B)-C(26B)-C(27B)-C(28B) | -178.8(4) |
| C(26B)-C(27B)-C(28B)-C(29B) | -3.2(7)   |
| C(26B)-C(27B)-C(28B)-C(34B) | 177.6(4)  |
| C(27B)-C(28B)-C(29B)-C(30B) | 3.5(7)    |
| C(34B)-C(28B)-C(29B)-C(30B) | -177.3(4) |
| C(28B)-C(29B)-C(30B)-C(25B) | -1.0(6)   |
| C(28B)-C(29B)-C(30B)-C(37B) | 177.1(4)  |
| C(26B)-C(25B)-C(30B)-C(29B) | -2.0(6)   |
| C(24B)-C(25B)-C(30B)-C(29B) | 168.7(4)  |
| C(26B)-C(25B)-C(30B)-C(37B) | 180.0(4)  |
| C(24B)-C(25B)-C(30B)-C(37B) | -9.3(6)   |
| C(27B)-C(26B)-C(31B)-C(33B) | -52.7(5)  |
| C(25B)-C(26B)-C(31B)-C(33B) | 128.2(4)  |
| C(27B)-C(26B)-C(31B)-C(32B) | 71.5(5)   |
| C(25B)-C(26B)-C(31B)-C(32B) | -107.6(5) |
| C(29B)-C(28B)-C(34B)-C(35B) | 126.4(5)  |
| C(27B)-C(28B)-C(34B)-C(35B) | -54.4(6)  |
| C(29B)-C(28B)-C(34B)-C(36B) | -106.2(6) |
| C(27B)-C(28B)-C(34B)-C(36B) | 73.0(6)   |



|                             |            |
|-----------------------------|------------|
| C(29B)-C(30B)-C(37B)-C(39B) | 53.3(6)    |
| C(25B)-C(30B)-C(37B)-C(39B) | -128.7(4)  |
| C(29B)-C(30B)-C(37B)-C(38B) | -70.9(5)   |
| C(25B)-C(30B)-C(37B)-C(38B) | 107.1(5)   |
| Au(1A)-S(5)-C(40B)-F(2B)    | -57.7(5)   |
| Au(1A)-S(5)-C(40B)-F(1B)    | -177.1(4)  |
| Au(1A)-S(5)-C(40B)-F(3B)    | 63.2(4)    |
| C(19B)-P(1A)-C(7B)-C(12B)   | 24.3(7)    |
| C(13B)-P(1A)-C(7B)-C(12B)   | 132.5(6)   |
| Au(1A)-P(1A)-C(7B)-C(12B)   | -108.2(6)  |
| C(19B)-P(1A)-C(7B)-C(8B)    | 151.2(5)   |
| C(13B)-P(1A)-C(7B)-C(8B)    | -100.6(6)  |
| Au(1A)-P(1A)-C(7B)-C(8B)    | 18.8(6)    |
| C(12B)-C(7B)-C(8B)-C(9B)    | -58.3(9)   |
| P(1A)-C(7B)-C(8B)-C(9B)     | 171.4(6)   |
| C(11B)-C(10B)-C(9B)-C(8B)   | -52.4(8)   |
| C(7B)-C(8B)-C(9B)-C(10B)    | 56.4(9)    |
| C(10B)-C(11B)-C(12B)-C(7B)  | -52.6(8)   |
| C(8B)-C(7B)-C(12B)-C(11B)   | 56.1(9)    |
| P(1A)-C(7B)-C(12B)-C(11B)   | -177.3(5)  |
| C(19B)-P(1A)-C(7P)-C(8P)    | 163.2(11)  |
| C(13B)-P(1A)-C(7P)-C(8P)    | -80.0(13)  |
| Au(1A)-P(1A)-C(7P)-C(8P)    | 42.6(12)   |
| C(19B)-P(1A)-C(7P)-C(12P)   | -71.6(12)  |
| C(13B)-P(1A)-C(7P)-C(12P)   | 45.1(13)   |
| Au(1A)-P(1A)-C(7P)-C(12P)   | 167.8(10)  |
| C(12P)-C(7P)-C(8P)-C(9P)    | 60.5(17)   |
| P(1A)-C(7P)-C(8P)-C(9P)     | -174.1(11) |
| C(7P)-C(8P)-C(9P)-C(10B)    | -50.5(17)  |
| C(11B)-C(10B)-C(9P)-C(8P)   | 48.8(14)   |
| C(8P)-C(7P)-C(12P)-C(11B)   | -67.5(17)  |
| P(1A)-C(7P)-C(12P)-C(11B)   | 165.0(9)   |
| C(10B)-C(11B)-C(12P)-C(7P)  | 59.3(13)   |

---
